# Supplementary material for: Strong impact of natural-selection–free heterogeneity in genetics of age-related phenotypes
Source: Aging (Albany NY). 2018 Mar 29;10(3):492–514. doi: 10.18632/aging.101407 (PMC5892700; doi:10.18632/aging.101407)
Supplement: Supplementary Table 3 [file aging-10-101407-s002.xlsx]

## Sheet: Supplementary Table 3
Supplementary Table 3. SNPs attained genome-wide significance (p<5E-8) in univariate meta-analysis of individual phenotypes.
ID	Gene(s)1	SNP2	Chr	Location	SNP function	EA	EAF	Trait	β_meta	SE_meta	P_meta	P_Fisher	Ratio	I2 (%)	P_grasp	ES signs
1	MTHFR	rs17367504	1	11802721	intron	G	0.1469	DBP	-0.559879	0.0942985	2.9e-09	4.3e-08	1.15897	45.1	3.5e-19	-----
2	DOCK7/ANGPTL3-ATG4C*	rs12130333	1	62726106		A	0.1846	TG	-3.54094	0.629392	1.84e-08	2.15e-07	1.16012	0	7.31e-23	-?--?
3	GCKR	rs780094	2	27518370	intron	T	0.4253	BG	-0.690435	0.124147	2.68e-08	2.36e-11	0.712506	87.8	5.6e-38	-?---
3	GCKR	rs780094	2	27518370	intron	T	0.4253	TG	6.87612	0.509786	1.83e-41	1.18e-40	1.02027	68.9	7e-125	+?++?
3	GCKR	rs780094	2	27518370	intron	T	0.4253	TC	1.06564	0.145191	2.14e-13	8.36e-13	1.049	69.6	1e-24	+?+++
4	GCKR	rs780092	2	27520287	intron	G	0.1428	TG	-5.22179	0.706739	1.48e-13	4.21e-12	1.12782	0	6.33e-34	-?--?
5	TMEM163	rs6745983	2	134673139	intron	C	0.4955	HC	-0.0769764	0.0140435	4.22e-08	2.76e-07	1.12435	50.6	NA	-?--?
6	SLC39A8	rs13107325	4	102267552	missense	A	0.0818	DBP	-0.913692	0.149107	8.91e-10	1.07e-08	1.13544	23.3	2.3e-17	?----
7	LPL*	rs2410616	8	19971168		A	0.1734	TG	-4.10976	0.623879	4.47493e-11	4.02858e-09	1.23281	0	2.18e-15	----?
8	LPL*	rs17482753	8	19975135		T	0.1065	TG	-10.8303	0.829798	6.22e-39	2.51e-37	1.04388	0	1.06e-109	-?--?
8	LPL*	rs17482753	8	19975135		T	0.1065	HDL-C	4.97209	0.369095	2.32e-41	7.34e-40	1.03833	51.9	2.41e-94	+?+++
9	LPL*	rs17410962	8	19990569		A	0.1366	HDL-C	3.96622	0.33773	7.60508e-32	6.2456e-30	1.06555	17.8	4.46e-80	+?+++
9	LPL*	rs17410962	8	19990569		A	0.1366	TG	-8.335	0.759143	4.8e-28	9.92e-27	1.05058	14.9	3.82e-92	-?--?
10	LPL*	rs17489268	8	19994534		A	0.2874	HDL-C	3.51471	0.251131	1.66e-44	1.14e-43	1.01949	96.9	3.3e-87	+?++-
10	LPL*	rs17489268	8	19994534		A	0.2874	TG	-7.77692	0.569737	2.02e-42	1.34e-40	1.04569	0	1.16e-105	-?--?
11	ABCA1	rs3905000	9	104894789	intron	A	0.1354	HDL-C	-1.67619	0.302482	3e-08	2.31e-07	1.13358	43.3	5.85e-32	-----
12	TCF7L2	rs10885409	10	113048313	intron	G	0.4621	BG	0.671707	0.119419	1.8572e-08	2.50603e-09	0.898864	75.2	0.000273	+++++
13	FADS1	rs174547	11	61803311	intron	C	0.3261	TC	-0.900766	0.153041	3.96e-09	1.49e-08	1.07353	64	2e-20	-?--+
13	FADS1	rs174547	11	61803311	intron	C	0.3261	HDL-C	-1.85198	0.237862	6.92e-15	3.09e-13	1.13188	0.9	1e-21	-?---
14	BUD13-ZPR1/APOA5*	rs2155216	11	116661022		A	0.0308	TG	11.4599	1.53839	9.38e-14	2.07e-12	1.11501	0	1.63e-14	+?++?
15	ZPR1/APOA5-APOA4*	rs6589567	11	116799960		T	0.1178	TG	8.97113	0.787736	4.77e-30	2.55e-28	1.06262	0	2.34e-69	+?++?
15	ZPR1/APOA5-APOA4*	rs6589567	11	116799960		T	0.1178	TC	1.42762	0.225737	2.54437e-10	7.45742e-09	1.1805	12.9	1.31e-25	+?+++
16	SIK3	rs7115242	11	117037567	intron	T	0.1027	TG	7.77763	0.876208	6.9e-19	3.09e-17	1.10001	0	3.33e-45	+?++?
17	LIPC/LIPC-AS1	rs261332	15	58435126	intron	T	0.1955	HDL-C	2.58798	0.276714	8.56e-21	1.04e-19	1.05713	56.2	1.78e-76	+?+++
17	LIPC/LIPC-AS1	rs261332	15	58435126	intron	T	0.1955	TC	0.969949	0.178086	5.14e-08	2.74e-09	0.851299	82.2	3.37e-16	+?++-
18	LIPC/LIPC-AS1	rs261336	15	58450219	intron	C	0.1795	HDL-C	2.25117	0.297339	3.7e-14	2.18e-13	1.06083	60.6	3.71e-55	+?+++
Chr = chromosome; Location = location in base pairs; EA = effect allele; EAF = EA frequency.
Trait: phenotype with GW significance in the fixed-effects meta-analysis (β_meta and p_meta) and/or Fisher’s test (p_Fisher).
BG = blood glucose; DBP = diastolic systolic blood pressure; HC = hematocrit; HDL-C = high-density lipoprotein cholesterol; TC = total cholesterol; TG = triglycerides.
Ratio: log10(P_meta)/log10(P_Fisher).
I2 is the heterogeneity coefficient
P_grasp: the P-value from our pleiotropic meta-analysis of published results for the index SNPs available from GRASP (details in Online Methods, section “Significance and novelty”).
ES signs: signs of the effect sizes in the ARIC, CHS, FHS, MESA and HRS cohorts, respectively.
1 If an index SNP was not within protein coding gene, the closest gene was assigned. Multiple genes were assigned if they were at about the same distance up- and downstream from the index SNP or if the index SNP was within the region of overlapping genes.
2 Proxy SNPs with linkage disequilibrium (LD) r2>70% were excluded. LD with r2>1% for SNPs within ±1Mb flanking region retained in the table is given in Supplementary Table 2.
* Protein coding genes within ±100 Kb flanking region for the index SNP.
