# Supplementary material for: Strong impact of natural-selection–free heterogeneity in genetics of age-related phenotypes
Source: Aging (Albany NY). 2018 Mar 29;10(3):492–514. doi: 10.18632/aging.101407 (PMC5892700; doi:10.18632/aging.101407)
Supplement: Supplementary Table 4 [file aging-10-101407-s003.xlsx]

## Sheet: Supplementary Table 4A
Supplementary Table 4A. Replicated SNPs attained genome-wide significance in pleiotropic meta-analysis.
ID	Gene(s)1	SNP2	Chr	Location	SNP function	EA	EAF	Domain	NP	Pathway	Meta p-values				Group	Pathway	PGrasp	NG
										1	PMOp	PMOb	PMFp	PFcFp
										2	POpFc	PObFc		PFpFc
1	PABPC4	rs4660293	1	39562508	intron	C	0.235	12M	4	2	1.67e-14	1.18e-09		4.73e-08	HP	2	9.77e-15	6
2	MAPK10	rs17451111	4	86353021	intron	G	0.3411	12M	3	2	6.56e-09	1.47e-08		0.00829	HP/HB	2	9.53e-09	4
3	POC5*	rs7715806	5	75738562		G	0.3854	12M	4	2	3.49e-14	3.02e-10		2.94e-09	HP	2	5.67e-14	3
4	HCG23	rs17423649	6	32389356	nearGene-5, intron	A	0.1258	12M	3	1	3.34e-12	0.000104	6.86e-08	2.98e-07	HP	1	6.52e-11	3
5	DAXX*	rs3130267	6	33339017		T	0.4633	20P	5	2	4.37e-09	0.0144		0.00066	HP	2	8.29e-09	5
6		rs7004769	8	9330085	intron	A	0.1979	12M	2	2	1.48e-15	9.96e-12		7.73e-07	HP/HB	2	2.94e-13	3
7	CDKN2B*	rs564398	9	22029548	intron, ncRNA	G	0.3986	20P	3	1	3.64e-13	0.000105	6.92e-05	0.000656	HP	1	1.58e-42	6
8	ABCA1	rs4149311	9	104826496	intron	T	0.1314	12M	3	2	8.85e-11	8.27e-05		0.000384	HP	2	8.74e-15	3
9	SIK3	rs10502221	11	116956154	intron	T	0.3759	12M	8	2	7.18e-15	1.29e-10		1.43e-11	HP	2	7.62e-15	3
Chr = chromosome; Location = location in base pairs; EA = effect allele; EAF = EA frequency.
Domain: a domain of phenotypes in which a given SNP attained minimal genome-wide significant p-value in our pleiotropic meta-analysis. Minimal p-value was considered across domains of 12 quantitative markers (12M), domain of 7 diseases and death (8DD), and domain of all 20 phenotypes (20P). P-values are given for all pleiotropic meta-tests in a given pathway (Fig. 1).
Group: the type of association defined in the “Antagonistic genetic heterogeneity in pleiotropic meta-analysis” section.
PGRASP: p-values from the pleiotropic meta-analysis of results for the index SNPs reported in GRASP for phenotypes used in 12M or 20P domain reported in column “Domain”.
NP and NG show the number of phenotypes that attained a minimal p-value (p<0.05) in the meta- or Fisher test in a given phenotypic domain in pathway 1 and Fisher test of GRASP results, respectively.
1 If an index SNP was not within protein coding gene, the closest gene was assigned. Multiple genes were assigned if they were at about the same distance up- and downstream from the index SNP or if the index SNP was within the region of overlapping genes.
2 Proxy SNPs with linkage disequilibrium (LD) r2>70% were excluded. LD with r2>1% for SNPs within ±1Mb flanking region retained in the table is given in Supplementary Table 2.
* Protein coding genes within ±100 Kb flanking region for the index SNP.
PMOp, PMOb, PMFp, PFcFp, POpFc, PObFc, and PFpFc: p-values for meta-tests (subscripts) defined in Fig. 1.

## Sheet: Supplementary Table 4B
Supplementary Table 4B. Effect sizes and p-values from the univariate meta-analysis of the associations of SNPs from Table S4A with 20 phenotypes in pathway 1a using fixed-effects meta-test.
									BMI			BG			TC			HDL-C			TG			SBP			DBP			HR			HC			CRP			Creatinine			FVC			CHD			HF
ID	Gene(s)1	SNP2	Chr	Location	SNP function	EA	EAF	Pathway	β	p-value	Direction	β	p-value	Direction	β	p-value	Direction	β	p-value	Direction	β	p-value	Direction	β	p-value	Direction	β	p-value	Direction	β	p-value	Direction	β	p-value	Direction	β	p-value	Direction	β	p-value	Direction	β	p-value	Direction	β	p-value	Direction	β	p-value
1	PABPC4	rs4660293	1	39562508	intron	C	0.235	2	0.1828	0.2406	++++-	0.5009	0.0003237	+++++	-0.1063	0.5031	-+++-	-1.1936	1.24e-06	-----	1.3083	0.01447	++++?	0.2036	0.1521	++++-	0.1406	0.07318	++++-	0.2739	0.05147	++-+?	-0.0331	0.046	-+--?	0.0167	0.2246	+++++	-0.001	0.6573	-++-?	-0.0167	0.04531	--+-?	0.023	0.2999	-+-++	0.0212	0.4627
2	MAPK10	rs17451111	4	86353021	intron	G	0.3411	2	-0.2559	0.08016	-?--+	-0.0986	0.4421	-?-++	0.1007	0.5011	+?-+-	0.741	0.001486	+?+-+	-1.2873	0.01439	-?-+?	-0.161	0.2232	-?+--	0.0095	0.898	+?+-+	-0.1172	0.3968	-?-+?	-0.0057	0.7003	+?-+?	-0.0294	0.03309	+?---	-0.0039	0.06888	-?--?	-0.0076	0.3707	-?--?	-0.0037	0.8653	+?+--	0.0035	0.9042
3	POC5*	rs7715806	5	75738562		G	0.3854	2	0.6861	1.976e-06	+?+++	0.1184	0.3497	+?---	-0.7488	3.729e-07	-?---	-0.3845	0.0932	-?+--	0.4654	0.3688	+?--?	0.0913	0.4837	+?-++	-0.1496	0.04023	-?---	0.0199	0.8838	+?-+?	0.0103	0.4789	+?+-?	-0.0122	0.3659	-?-+-	0.0028	0.192	+?-+?	-0.0091	0.2772	-?-+?	0.0284	0.1901	+?--+	0.0275	0.3395
4	HCG23	rs17423649	6	32389356	nearGene-5, intron	A	0.1258	1	0.1888	0.3334	+-++-	0.0403	0.818	+++--	0.6645	0.0008688	++++-	-0.6075	0.04938	--+--	2.9624	1.048e-05	++++?	0.3398	0.05674	+-+++	0.3082	0.001768	+-+++	0.2613	0.1405	++-+?	0.0355	0.08967	++++?	0.0239	0.1702	+-++-	-0.0032	0.2665	---+?	0.0039	0.7147	-+++?	0.0524	0.05938	++-++	-0.0013	0.9729
5	DAXX*	rs3130267	6	33339017		T	0.4633	2	-0.0521	0.6956	-++--	0.1211	0.3105	++++-	-0.4697	0.0005349	---+-	-0.1985	0.3455	--+--	-0.4075	0.3735	-+-+?	0.1735	0.1534	+-+-+	-0.0077	0.9086	++--+	0.003	0.98	+--+?	-0.0036	0.7946	+---?	0.0032	0.7857	++--+	-0.0005	0.801	-+--?	0.0006	0.9311	-+++?	-0.0192	0.3136	-+--+	0.0465	0.06024
6		rs7004769	8	9330085	intron	A	0.1979	2	0.0226	0.8913	+---+	0.167	0.2622	++++-	-0.4463	0.0083	----+	-1.062	5.178e-05	----+	0.8595	0.1326	++-+?	0.161	0.2876	++--+	0.0931	0.2654	+--++	-0.271	0.07089	----?	0.0271	0.1209	+-++?	-0.0283	0.0533	----+	0.0002	0.9403	+---?	0.0083	0.3533	++++?	-0.0003	0.9916	+---+	0.0304	0.3271
7	CDKN2B*	rs564398	9	22029548	intron, ncRNA	G	0.3986	1	0.0506	0.7094	++-+-	0.1824	0.1324	--++-	0.4157	0.002717	+++-+	0.1524	0.4776	+-+++	0.7413	0.1123	++++?	0.2025	0.1022	++-++	0.1198	0.08049	+--++	-0.1307	0.2889	---+?	0.0096	0.5064	+++-?	0.0033	0.7832	-+-++	-0.0006	0.7635	-+--?	-0.0033	0.656	-++-?	-0.1026	1.677e-07	---+-	-0.0326	0.1979
8	ABCA1	rs4149311	9	104826496	intron	T	0.1314	2	-0.1312	0.5082	+---+	-0.1047	0.558	+++--	0.7298	0.0002988	+-++-	0.6872	0.0282	+-++-	-0.0036	0.9957	-++-?	0.1433	0.4282	-++-+	0.0165	0.8689	-+--+	-0.187	0.2947	-+--?	-0.0392	0.05896	++-+?	0.0028	0.8699	+++--	0.0012	0.6836	++-+?	0.0079	0.4569	++-+?	0.0244	0.3873	-+++-	-0.002	0.9566
9	SIK3	rs10502221	11	116956154	intron	T	0.3759	2	-0.2537	0.11	-+-+?	0.0654	0.6789	-+++?	-0.641	1.494e-05	----?	-0.648	0.006223	----?	-1.4169	0.002328	-+--?	-0.2713	0.05411	--++?	-0.2623	0.0006664	---+?	-0.1378	0.2593	-+-+?	0.0088	0.5314	-+++?	-0.0337	0.01078	-+--?	0.0001	0.9747	++--?	0.0191	0.008455	+++-?	-0.0303	0.2127	----?	-0.0192	0.5406
Chr = chromosome; Location = location in base pairs; EA = effect allele; EAF = EA frequency.
Quantitative markers: blood glucose (BG); body mass index (BMI); C-reactive protein (CRP); creatinine; diastolic blood pressure (DBP); forced vital capacity (FVC); heart rate (HR); hematocrit (HC); high-density lipoprotein cholesterol (HDL-C); systolic blood pressure (SBP); total cholesterol (TC); and triglycerides (TG).
Risk outcomes: Alzheimer’s disease and related dementias (AD), atrial fibrillation (AF); cancer; coronary heart disease (CHD); diabetes mellitus (DM); death; heart failure (HF); and stroke.
1 If an index SNP was not within protein coding gene, the closest gene was assigned. Multiple genes were assigned if they were at about the same distance up- and downstream from the index SNP or if the index SNP was within the region of overlapping genes.
2 Proxy SNPs with linkage disequilibrium (LD) r2>70% were excluded. LD with r2>1% for SNPs within ±1Mb flanking region retained in the table is given in Supplementary Table 2.
* Protein coding genes within ±100 Kb flanking region for the index SNP.
[truncated: 19 more columns]

## Sheet: Supplementary Table 4C
Supplementary Table 4C. P-values from the univariate meta-analysis of the associations of SNPs from Table S4A with 20 phenotypes in pathway 1a using Fisher's test.
ID	Gene(s)1	SNP2	Chr	Location	SNP function	EA	EAF	Domain	Pathway	P_BMI	P_BG	P_TC	P_HDL-C	P_TG	P_SBP	P_DBP	P_HR	P_HC	P_CRP	P_Creatinine	P_FVC	P_CHD	P_HF	P_stroke	P_DM	P_cancer	P_death	P_AF	P_AD
1	PABPC4	rs4660293	1	39562508	intron	C	0.235	12M	2	0.38692	0.000217351	0.407561	8.19e-05	0.0662829	0.00222503	0.00510624	0.0707923	0.148165	0.857785	0.360495	0.147216	0.216749	0.237614	0.291078	0.0766927	0.276043	0.728628	0.21153	0.259475
2	MAPK10	rs17451111	4	86353021	intron	G	0.3411	12M	2	0.0400575	0.162522	0.0684227	0.00352237	0.0215057	0.471205	0.585774	0.73513	0.981828	0.274078	0.290779	0.505331	0.275468	0.590057	0.305097	0.975892	0.39998	0.329417	0.191087	0.916395
3	POC5*	rs7715806	5	75738562		G	0.3854	12M	2	9.14e-06	0.00412606	1.35e-05	0.0174909	0.107993	0.42604	0.230276	0.347119	0.167126	0.844857	0.0618454	0.394901	0.22372	0.242253	0.045882	0.771548	0.238385	0.791441	0.0242453	0.0268194
4	HCG23	rs17423649	6	32389356	nearGene-5, intron	A	0.1258	12M	1	0.383083	0.08646	0.00621183	0.0707663	0.000138817	0.159318	0.000518261	0.0628006	0.167805	0.0866839	0.666054	0.373492	0.11236	0.415568	0.706422	0.00240586	0.656586	0.276486	0.554541	0.587268
5	DAXX*	rs3130267	6	33339017		T	0.4633	20P	2	0.709433	0.369258	0.00513315	0.397206	0.376359	0.286506	0.243195	0.086704	0.0622161	0.395458	0.845515	0.990432	0.3099	0.0274133	0.176824	0.76197	0.0162723	0.00079627	0.0182188	0.978785
6		rs7004769	8	9330085	intron	A	0.1979	12M	2	0.0194704	0.542597	0.0560112	5.43e-06	0.128222	0.358263	0.0981692	0.319386	0.114621	0.0833539	0.573496	0.82005	0.439841	0.250158	0.195174	0.367949	0.90214	0.617512	0.678858	0.986127
7	CDKN2B*	rs564398	9	22029548	intron, ncRNA	G	0.3986	20P	1	0.309503	0.636401	0.0154227	0.148474	0.371916	0.0856063	0.0193109	0.612334	0.750274	0.739038	0.411446	0.214692	4.41e-06	0.517643	0.322079	0.144672	0.61424	0.775858	0.984158	0.121612
8	ABCA1	rs4149311	9	104826496	intron	T	0.1314	12M	2	0.94696	0.816884	0.000332017	0.000150187	0.338878	0.050482	0.145718	0.0927116	0.0070271	0.621382	0.871496	0.359607	0.297921	0.606034	0.0892465	0.262451	0.559131	0.537565	0.114682	0.995272
9	SIK3	rs10502221	11	116956154	intron	T	0.3759	12M	2	0.00216781	0.601541	0.000203109	0.0128926	0.00826007	0.00630398	0.000395244	0.242986	0.667375	0.00143411	0.670797	0.0353163	0.724976	0.194948	0.00745695	0.404326	0.137027	0.847467	0.874081	0.689003
Chr = chromosome; Location = location in base pairs; EA = effect allele; EAF = EA frequency.
Quantitative markers: blood glucose (BG); body mass index (BMI); C-reactive protein (CRP); creatinine; diastolic blood pressure (DBP); forced vital capacity (FVC); heart rate (HR); hematocrit (HC); high-density lipoprotein cholesterol (HDL-C); systolic blood pressure (SBP); total cholesterol (TC); and triglycerides (TG).
Risk outcomes: Alzheimer’s disease and related dementias (AD), atrial fibrillation (AF); cancer; coronary heart disease (CHD); diabetes mellitus (DM); death; heart failure (HF); and stroke.
1 If an index SNP was not within protein coding gene, the closest gene was assigned. Multiple genes were assigned if they were at about the same distance up- and downstream from the index SNP or if the index SNP was within the region of overlapping genes.
2 Proxy SNPs with linkage disequilibrium (LD) r2>70% were excluded. LD with r2>1% for SNPs within ±1Mb flanking region retained in the table is given in Supplementary Table 2.
* Protein coding genes within ±100 Kb flanking region for the index SNP.

## Sheet: Supplementary Table 4D
Supplementary Table 4D. The results of pleiotropic meta-analysis for SNPs from Supplementary Table 4A in each phenotypic domain.
								Pathway	Meta p-values for 12M domain				Meta p-values for 8DD domain				Meta p-values for 20P domain
ID	Gene(s)1	SNP2	Chr	Location	SNP function	EA	EAF	1	PMOp	PMOb	PMFp	PFcFp	PMOp	PMOb	PMFp	PFcFp	PMOp	PMOb	PMFp	PFcFp
								2	POpFc	PObFc		PFpFc	POpFc	PObFc		PFpFc	POpFc	PObFc		PFpFc
1	PABPC4	rs4660293	1	39562508	intron	C	0.235	2	1.67e-14	1.18e-09		4.73e-08	0.471	0.359		0.0816	3.51e-11	2.09e-08		3.6e-07
2	MAPK10	rs17451111	4	86353021	intron	G	0.3411	2	6.56e-09	1.47e-08		0.00829	0.921	0.789		0.572	0.0139	1.5e-06		0.0333
3	POC5*	rs7715806	5	75738562		G	0.3854	2	3.49e-14	3.02e-10		2.94e-09	0.184	0.106		0.0336	5.92e-11	3.76e-10		1.17e-09
4	HCG23	rs17423649	6	32389356	nearGene-5, intron	A	0.1258	1	3.34e-12	0.000104	6.86e-08	2.98e-07	0.419	0.198	0.242	0.0784	4.45e-06	0.000269	6.16e-07	4.55e-07
5	DAXX*	rs3130267	6	33339017		T	0.4633	2	0.00309	0.231		0.137	0.00162	0.0165		0.000205	4.37e-09	0.0144		0.00066
6		rs7004769	8	9330085	intron	A	0.1979	2	1.48e-15	9.96e-12		7.73e-07	0.933	0.935		0.726	4.46e-06	1.64e-10		3.91e-05
7	CDKN2B*	rs564398	9	22029548	intron, ncRNA	G	0.3986	1	0.0286	0.0842	0.0371	0.0417	0.000106	6.02e-05	0.000109	0.00159	3.64e-13	0.000105	6.92e-05	0.000656
8	ABCA1	rs4149311	9	104826496	intron	T	0.1314	2	8.85e-11	8.27e-05		0.000384	0.554	0.491		0.287	9.31e-11	6.46e-05		0.000254
9	SIK3	rs10502221	11	116956154	intron	T	0.3759	2	7.18e-15	1.29e-10		1.43e-11	0.518	0.413		0.322	2.49e-10	1.25e-08		4.71e-09
Chr = chromosome; Location = location in base pairs; EA = effect allele; EAF = EA frequency.
12M domain: BG, BMI, CRP, creatinine, DBP, FVC, HC, HDL-C, HR, SBP, TC, TG
8DD domain: AD, AF, cancer, CHD, DM, death, HF, stroke
20P domain: BG, BMI, CRP, Creatinine, DBP, FVC, HC, HDL-C, HR, SBP, TC, TG, CHD, HF, stroke, DM, cancer, death, AF, ND
Quantitative markers: blood glucose (BG); body mass index (BMI); C-reactive protein (CRP); creatinine; diastolic blood pressure (DBP); forced vital capacity (FVC); heart rate (HR); hematocrit (HC); high-density lipoprotein cholesterol (HDL-C); systolic blood pressure (SBP); total cholesterol (TC); and triglycerides (TG).
Risk outcomes: Alzheimer’s disease and related dementias (AD), atrial fibrillation (AF); cancer; coronary heart disease (CHD); diabetes mellitus (DM); death; heart failure (HF); and stroke.
1 If an index SNP was not within protein coding gene, the closest gene was assigned. Multiple genes were assigned if they were at about the same distance up- and downstream from the index SNP or if the index SNP was within the region of overlapping genes.
2 Proxy SNPs with linkage disequilibrium (LD) r2>70% were excluded. LD with r2>1% for SNPs within ±1Mb flanking region retained in the table is given in Supplementary Table 2.
* Protein coding genes within ±100 Kb flanking region for the index SNP.
PMOp, PMOb, PMFp, PFcFp, POpFc, PObFc, and PFpFc: p-values for meta-tests (subscripts) defined in Fig. 1.
