# Supplementary material for: Strong impact of natural-selection–free heterogeneity in genetics of age-related phenotypes
Source: Aging (Albany NY). 2018 Mar 29;10(3):492–514. doi: 10.18632/aging.101407 (PMC5892700; doi:10.18632/aging.101407)
Supplement: Supplementary Table 5 [file aging-10-101407-s004.xlsx]

## Sheet: Supplementary Table 5A
Supplementary Table 5A. Effect sizes and p-values from the univariate meta-analysis of the associations of SNPs from Table 2 with 20 phenotypes in pathway 1a using fixed-effects meta-test.
									BMI			BG			TC			HDL-C			TG			SBP			DBP			HR			HC			CRP			Creatinine			FVC			CHD			HF
ID	Gene(s)1	SNP2	Chr	Location	SNP function	EA	EAF	Pathway	β	p-value	Direction	β	p-value	Direction	β	p-value	Direction	β	p-value	Direction	β	p-value	Direction	β	p-value	Direction	β	p-value	Direction	β	p-value	Direction	β	p-value	Direction	β	p-value	Direction	β	p-value	Direction	β	p-value	Direction	β	p-value	Direction	β	p-value
1	CLCN6	rs17376328	1	11816605	intron	A	0.051	2	-0.653545	0.0871	?--?-	-0.494899	0.1216	?--?-	0.259319	0.538	?-+?+	1.58828	0.01058	?++?-	-2.93767	0.09099	?--??	-1.56601	7.473e-06	?--?-	-0.92681	2.806e-06	?--?-	0.26847	0.5002	?+-??	0.00202435	0.9562	?++??	-0.0235245	0.4318	?+-?-	-0.00739934	0.2556	?+-??	0.0460595	0.1098	?++??	0.0113183	0.8255	?+-?+	0.0103305	0.8757
2	NKAIN1-SNRNP40/ZCCHC17*	rs7549339	1	31249319		A	0.218	2	0.769802	8.832e-06	+?+++	0.452941	0.00281	+?+++	0.028755	0.8713	+?-+-	-0.558408	0.04298	-?--+	2.11051	0.000711	+?++?	0.084164	0.5914	-?+++	0.0346206	0.693	+?++-	0.200692	0.2216	+?--?	-0.0120931	0.4902	+?--?	0.0225847	0.1615	+?++-	0.00277551	0.2789	+?-+?	-0.0193549	0.05547	-?--?	0.0373307	0.1469	+?-++	-0.00580221	0.8666
3	TINAGL1-SERINC2*	rs16834550	1	31530916		A	0.125	2	0.797096	0.0008119	++++?	0.607074	0.01073	+-++?	0.0025102	0.991	-++-?	-0.892802	0.01207	-+--?	1.28742	0.06317	+-++?	0.627093	0.003134	+-++?	0.0885735	0.4447	--++?	0.0723272	0.6934	+--+?	-0.0204519	0.3438	+---?	0.0318614	0.1061	-+++?	-0.00173525	0.5612	---+?	-0.0135892	0.2124	--++?	0.0120236	0.7413	++-+?	-0.027171	0.5623
4	CSMD2	rs10914845	1	34022514	intron	C	0.499	1	0.227367	0.08883	++-++	0.164711	0.1687	++--+	0.331221	0.01511	+-+-+	-0.0112937	0.9574	--+++	0.559211	0.2254	+++-?	0.00157377	0.9897	++---	-0.0487157	0.4698	-----	-0.0956306	0.4308	-+-+?	-0.00580035	0.6781	--++?	0.01176	0.3214	+++-+	0.00194831	0.3245	++-+?	-0.013887	0.05525	----?	0.0331081	0.08469	++--+	0.0333028	0.1815
5		rs7551194	1	38680229		A	0.249	1	0.437633	0.004801	+++++	0.31209	0.02478	+-+-+	0.2193	0.1664	--+++	-0.428047	0.08139	-+---	0.699989	0.1879	+-++?	0.23052	0.1043	+++++	0.128497	0.1001	+++++	0.173998	0.2145	+-++?	0.0182637	0.2773	+-++?	0.0381608	0.005629	++++-	-0.000753444	0.7452	-+--?	-0.0021193	0.7977	-+--?	-0.0135233	0.5397	--+-+	-0.0144344	0.613
6	AKIRIN1/NDUFS5-MACF1*	rs7554809	1	39038206	intron	A	0.168	2	0.0169967	0.9367	-++-?	-0.139454	0.5132	-+--?	0.584276	0.003455	++++?	0.669491	0.03577	--++?	-0.198069	0.7524	++--?	-0.249657	0.1902	-+--?	0.110558	0.288	++--?	0.0888374	0.5893	-++-?	0.00329659	0.8644	+---?	0.0123671	0.4765	+-+-?	0.000188142	0.9444	--++?	-0.0101024	0.3068	---+?	-0.0611284	0.06763	-+-+?	-0.0234087	0.5857
7		rs778405	1	56237741		A	0.493	2	-0.106053	0.4244	++-++	-0.0395169	0.739	----+	-0.103826	0.4444	----+	-0.186189	0.3759	-+++-	-0.0888999	0.8466	++--?	-0.170388	0.1596	---++	-0.000657553	0.9922	+--++	0.0761819	0.5277	+--+?	0.0268479	0.05529	++++?	-0.00597016	0.611	-+-+-	-0.00303177	0.1249	++--?	-0.000909286	0.8996	--+-?	0.00937001	0.6214	---++	-0.0251151	0.3081
8	PTGER3	rs1327464	1	70900555	intron	A	0.339	1	0.244685	0.08683	+++++	0.106147	0.409	+-+-+	0.0884835	0.5416	+--+-	-0.295476	0.1886	-+---	1.47971	0.002302	+-++?	0.33128	0.01084	+-++-	0.224307	0.001803	++++-	0.256601	0.04508	+-++?	0.0256596	0.08658	-+++?	0.0411936	0.001108	+++++	-0.0021419	0.3081	----?	0.00378413	0.6196	-+++?	0.00423567	0.8366	+---+	0.0199974	0.452
9		rs17105569	1	80872915		A	0.136	1	-0.434245	0.8334	--+-?	-0.14975	0.7877	-++-?	-0.0772388	0.8423	+---?	0.133632	0.4775	+--+?	-0.402213	0.4367	-++-?	-0.253158	0.3184	-++-?	-0.27031	0.1751	+-+-?	-0.489753	0.05091	+-+-?	-0.0516016	0.05089	+-+-?	-0.048746	0.8512	+-+-?	-0.000913111	0.6325	++--?	-0.0189715	0.4081	+-++?	0.0696433	0.2106	-+-+?	-0.00811488	0.08269
10	RNPC3/AMY2B-AMY2A*	rs4847151	1	103581040		T	0.365	2	-0.472664	0.0007892	-----	-0.128763	0.3054	--+-+	-0.074136	0.6056	-+-++	0.650452	0.003491	+-+-+	-0.242148	0.6198	-+-+?	-0.0580135	0.6508	---+-	-0.139756	0.04882	---+-	-0.053828	0.675	-+++?	0.00899047	0.5412	--++?	0.00686812	0.5862	--+++	-0.00147792	0.4787	-+--?	0.00995988	0.1951	++--?	0.00612254	0.7642	-++--	0.0268615	0.3118
11	NTNG1	rs7542677	1	107319431	intron	T	0.1	2	-0.0964889	0.6765	----+	-0.113654	0.5829	----+	0.0598618	0.7997	+-+-+	0.175615	0.6315	-+++-	-0.466647	0.5586	+---?	0.515272	0.01468	+++-+	0.202986	0.08188	+++-+	-0.366267	0.08075	-++-?	0.0181341	0.4609	-++-?	-0.0469685	0.02115	+----	0.00491752	0.151	+++-?	0.00800227	0.5247	++--?	0.0182081	0.581	--+-+	0.000842234	0.9846
12	FCRL4-FCRL3*	rs1969742	1	157643547		C	0.317	2	0.073059	0.6597	++-+?	0.00945946	0.9543	+--+?	0.160731	0.2988	++--?	0.0663164	0.7886	--+-?	-0.0722191	0.882	+--+?	0.0880436	0.5504	+--+?	-0.0656886	0.4152	+--+?	-0.0426059	0.7388	+--+?	0.00935015	0.5286	-+++?	-0.0153548	0.262	+--+?	0.00150861	0.4699	+++-?	-0.00635698	0.4061	----?	0.00486354	0.8483	+--+?	0.0419719	0.203
13	OLFML2B	rs2490420	1	161994746	UTR-3	G	0.31	2	0.236697	0.09599	+++--	0.168003	0.1884	+++--	-0.0117568	0.9354	--+++	0.0938284	0.6765	+--++	0.87039	0.07564	+-++?	0.291116	0.02478	++++-	0.171381	0.01682	+++++	0.162439	0.2066	+-++?	-0.00314608	0.8332	++-+?	-0.0142592	0.2536	-++--	-0.00211909	0.3137	---+?	-0.00218808	0.776	---+?	0.00704802	0.7302	++++-	0.0343097	0.1948
14	PRRX1	rs9426908	1	170674846	intron	C	0.069	2	-0.186608	0.5017	-?+--	0.251247	0.3088	+?--+	-0.126647	0.6529	+?-+-	-1.2697	0.003906	-?-+-	3.06436	0.001667	+?+-?	0.0861327	0.7313	+?+-+	-0.106643	0.4466	-?+-+	-0.0629135	0.8064	+?+-?	0.0246571	0.3701	+?++?	0.0258115	0.3266	-?+-+	0.0020269	0.6158	-?++?	-0.00588519	0.7053	-?-+?	0.101652	0.01231	+?---	0.123743	0.02365
15	KCNH1	rs1934628	1	210739125	intron	G	0.164	2	-0.317797	0.07384	----+	-0.378877	0.01735	+---+	-0.208854	0.2495	-+++-	0.708164	0.01171	-++++	-1.32743	0.02981	--+-?	-0.240042	0.1394	----+	-0.134891	0.1327	----+	-0.0572677	0.7221	++-+?	0.0197731	0.2961	+-++?	-0.0349189	0.02675	-+---	0.000560434	0.8318	+--+?	-0.00607561	0.5255	---+?	-0.023709	0.3576	+----	-0.0567682	0.09078
16	ESRRG	rs1436879	1	216909043	intron	A	0.041	2	0.31945	0.362	++-++	0.48553	0.1231	++-++	-0.40774	0.2525	---++	-1.19681	0.02983	--+--	3.03152	0.01138	++-+?	-0.114284	0.721	++-+-	-0.194322	0.2708	---+-	0.135158	0.6685	-+++?	-0.0314434	0.3918	++-+?	0.0170699	0.5731	++++-	0.00494583	0.3371	-+++?	-0.0571943	0.00256	----?	0.0748084	0.1423	++-+-	0.0749272	0.2807
17	GREB1	rs7596162	2	11604106	intron	C	0.196	1	-0.293616	0.07941	-----	-0.0678679	0.6505	++-+-	0.0589697	0.7294	--++-	0.379789	0.1511	+-+++	0.585428	0.312	++++?	-0.43264	0.004507	-+---	-0.180931	0.03202	-+--+	-0.531927	0.0004552	----?	-0.0349955	0.04092	-+--?	-0.0284357	0.05438	+----	-0.00521972	0.03392	----?	-0.0144021	0.1137	----?	0.0374611	0.1184	+++--	-0.0188629	0.5497
18	SDC1-LAPTM4A*	rs11685359	2	20149672		T	0.137	1	0.233024	0.2206	+-+-+	0.105619	0.5382	++++-	-0.171228	0.376	---++	-0.479144	0.111	-----	1.07171	0.09765	++++?	0.746672	1.662e-05	+++++	0.312138	0.001109	+++++	0.201017	0.2407	-++-?	0.0550168	0.00659	+-++?	-0.00471599	0.7823	++--+	-0.00126607	0.6514	+-+-?	-0.00757706	0.456	--+-?	0.0264021	0.339	-++++	-0.00996006	0.7838
19	ADCY3-DNAJC27*	rs10182181	2	24927427		C	0.472	2	0.101978	0.4428	++++-	0.198561	0.09486	-++++	0.0200706	0.8826	++--+	0.0161304	0.9389	+-+-+	0.211573	0.6454	-+-+?	-0.0492719	0.6847	-+-++	-0.0995977	0.1376	---++	0.0368197	0.7606	++-+?	-0.00674639	0.6299	-+++?	0.0215948	0.06582	++++-	-0.0017931	0.3633	+---?	-0.00302549	0.6749	--+-?	0.0154168	0.4175	-+-++	0.00794653	0.7479
20	CAPN13	rs10173959	2	30806079	intron	A	0.297	2	-0.0340721	0.8164	-++--	0.0400951	0.7607	+-+--	0.170419	0.2538	+-+++	-0.286415	0.2163	++--+	0.507669	0.3135	--++?	0.118173	0.3772	-+++-	0.0957485	0.1954	+-++-	0.27794	0.03581	+++-?	-0.0245221	0.1097	----?	-0.00037394	0.9768	+-++-	0.000896674	0.6781	+---?	-0.00825603	0.2975	-+--?	0.0183836	0.3807	+-+-+	0.00288158	0.9165
21	CAPN13	rs10176484	2	30806230	UTR-5	A	0.304	2	0.0187737	0.2532	++---	0.254732	0.0005623	-----	0.11872	0.5578	---++	-0.2848	0.2783	-++-+	0.571137	0.5671	+--+?	0.183491	0.2952	++-+-	0.124022	0.09001	---+-	0.273538	0.02021	-+--?	-0.018444	0.3509	+-+-?	0.00454197	0.1316	---+-	0.000709593	0.2015	--+-?	-0.00775929	0.1658	+++-?	0.0164222	0.01702	----+	-0.0173372	0.9691
22		rs10495824	2	34525478		C	0.247	2	0.171374	0.2603	+++--	0.349297	0.0104	+-+++	0.0954516	0.5388	--+-+	-0.870834	0.0002932	---+-	1.59592	0.002298	++++?	0.103125	0.4583	+--++	0.07463	0.3312	+-+++	0.219594	0.1111	-+++?	0.014271	0.3766	+-+-?	0.00562636	0.6764	-+-++	-0.00129379	0.5665	+---?	-0.0123074	0.1335	-+--?	0.00310535	0.8867	--++-	-0.0343319	0.2274
23	THADA	rs17334919	2	43480246	intron	A	0.1	2	0.0945461	0.6764	++-+-	0.119911	0.557	-+--+	-0.315662	0.1739	-+--+	-0.124949	0.7285	+-+-+	0.0307666	0.9683	++-+?	-0.0103304	0.9604	--+-+	0.0567092	0.6207	-++-+	0.219618	0.2857	++--?	0.0485941	0.0543	+-++?	-0.0117404	0.5619	-+---	0.00417823	0.2186	+-++?	0.00042352	0.9719	-+++?	0.0314335	0.3267	+-+-+	0.0755417	0.07116
24	EPAS1	rs10191091	2	46346071	intron	G	0.498	2	0.0665227	0.6336	-?++-	0.0620118	0.6113	-?--+	-0.368024	0.009972	-?---	0.0610398	0.7831	+?---	-0.937042	0.06241	-?+-?	-0.171927	0.1727	-?+++	-0.0370736	0.5988	-?+++	0.0763305	0.5635	-?++?	0.00146728	0.9178	-?+-?	0.0109925	0.4017	+?+--	-0.000765958	0.7115	-?+-?	0.0125457	0.121	+?++?	-0.0212611	0.3055	-?++-	-0.0225698	0.4109
25	ANTXR1	rs4255990	2	69046532	intron	C	0.062	2	0.938363	0.0008478	+?+++	0.613801	0.01293	+?+-+	0.136817	0.6369	-?+--	-1.04247	0.02038	-?---	0.343206	0.7383	+?++?	0.531946	0.03712	+?-+-	0.0605897	0.6715	+?-+-	-0.0875653	0.7447	+?--?	-0.0215689	0.4473	+?-+?	0.0403446	0.1228	+?+++	0.00250247	0.5536	-?+-?	-0.04198	0.01167	-?-+?	0.0752958	0.06879	+?-++	0.0890626	0.1026
26	DNAH6	rs11889456	2	84619559	intron	C	0.077	1	0.192041	0.4425	++++-	-0.428087	0.05552	--+--	0.272452	0.2851	-+++-	-0.238552	0.5446	+----	0.135624	0.8763	-+++?	-0.644925	0.004559	-----	-0.385355	0.002211	----+	-0.739001	0.001067	----?	-0.00497119	0.8464	+-+-?	-0.0206794	0.3408	---++	0.00558984	0.1259	++++?	0.0395501	0.003893	++++?	-0.0980872	0.007634	-----	-0.0861553	0.07109
27	MGAT5	rs755503	2	134386883	intron	A	0.427	2	-0.298943	0.02705	----+	0.0442595	0.7148	+---+	0.12774	0.3543	-++-+	0.151986	0.4767	+-++-	-0.147668	0.751	-+--?	0.0117196	0.9242	++--+	0.00290768	0.9669	+---+	-0.303904	0.01296	+---?	-0.0066788	0.6361	-+--?	-0.00961476	0.4192	+-+-+	0.00544327	0.006409	-+++?	0.0100176	0.1696	++-+?	0.027821	0.1496	+++-+	0.0403295	0.1092
28	TMEM163	rs503562	2	134502500	intron	G	0.474	2	-0.196375	0.1413	+--+-	0.174036	0.1425	+-+++	-0.273914	0.04488	-+-++	-0.161704	0.4449	-+-+-	0.356634	0.4444	+-++?	0.171914	0.1573	+++++	0.051705	0.4419	-++++	0.143067	0.2425	++-+?	0.0142259	0.3088	+-+-?	0.000565284	0.9622	---++	-0.00272418	0.1693	+---?	-0.0149708	0.04172	-+++?	-0.012513	0.5152	---++	0.0100578	0.6881
29	TMEM163	rs666614	2	134532882	intron	G	0.416	1	0.0746874	0.593	+?-+-	0.0359925	0.768	-?-++	-0.468077	0.001102	-?--+	-0.107031	0.6312	-?-++	0.124691	0.8045	+?--?	0.318965	0.0116	+?++-	0.11816	0.09448	+?+++	0.348805	0.00861	+?++?	0.062732	1.207e-05	+?++?	-0.00388079	0.7688	-?-+-	-0.00358196	0.08492	-?--?	-0.0205518	0.01093	-?++?	-0.00356142	0.8637	-?++-	-0.0167872	0.542
30	UBXN4	rs6430585	2	135749357	intron	A	0.253	2	-0.328381	0.03758	--+--	-0.230625	0.1014	----+	0.574802	0.0003419	+++-+	0.493326	0.04749	+++++	-0.691145	0.2075	--+-?	-0.240214	0.09356	-+---	0.0424211	0.5933	-++-+	-0.321375	0.02391	++--?	-0.05421	0.0006363	----?	-0.0123645	0.365	-+---	0.00132683	0.564	++++?	0.00719536	0.4036	+---?	-0.0599133	0.008704	----+	-0.0425874	0.1502
31	CCDC141	rs12693171	2	178883720	intron	A	0.132	2	0.0178768	0.926	--++-	0.0250033	0.8843	-++-+	0.162683	0.4084	+-+-+	0.213036	0.4846	++-+-	-1.57648	0.01791	----?	0.477232	0.006636	-++++	0.244471	0.01178	+-++-	0.77048	1.043e-05	+-++?	0.0151551	0.4615	-+++?	0.0149726	0.3821	--++-	-0.00131398	0.6481	++--?	0.00873059	0.3977	+--+?	0.0249903	0.3564	-++--	-0.00600811	0.8674
32		rs6781156	3	5811612		T	0.394	1	0.0186364	0.8898	++-+-	0.189006	0.1165	++++-	0.0449454	0.743	+-++-	-0.476412	0.02482	-----	0.887324	0.05526	++++?	0.115005	0.3484	++-+-	0.0621493	0.3585	++-+-	0.0159965	0.8952	-+-+?	0.0150867	0.2895	++++?	0.0197007	0.09808	+++-+	0.00104095	0.6015	--++?	0.00593606	0.4114	+-++?	0.0610143	0.001468	+++++	0.0499474	0.04511
33	CCK*	rs11129950	3	42273095		C	0.15	2	-0.0684001	0.7227	--+--	-0.119311	0.4943	+-++-	-0.0247601	0.8993	-+++-	-0.174277	0.5659	-+-++	-0.639825	0.3321	--+-?	0.268254	0.127	--+--	0.135428	0.1633	+++--	-0.0412762	0.811	--+-?	0.00521899	0.7932	--+-?	0.0138597	0.4067	--+-+	0.00214567	0.4464	+-++?	-0.00515614	0.6209	-+-+?	-0.0254021	0.3618	--+--	-0.00605625	0.8668
34	WNT5A/ERC2*	rs751194	3	55453400		T	0.46	2	0.119833	0.3675	+--+-	-0.122957	0.3009	+--+-	0.181525	0.1815	-+++-	-0.183117	0.3845	-++-+	0.774057	0.09106	+--+?	-0.0881846	0.4674	+--+-	0.0557848	0.4047	+-++-	-0.074703	0.536	+---?	0.00840612	0.5514	++++?	0.00375745	0.7507	++--+	-6.92e-05	0.9721	-++-?	-0.000658338	0.9262	-+--?	0.000418854	0.9825	+-+-+	-0.013997	0.5713
35	FHIT	rs1716721	3	60696259	intron	A	0.126	2	0.268128	0.1867	+-+--	0.0042244	0.9814	+-+--	0.378115	0.06795	++--+	-0.31612	0.3248	---++	1.19516	0.08827	+-+-?	0.203517	0.272	+-+-+	0.0699288	0.4948	-++--	0.224697	0.2226	+-+-?	0.0373909	0.08049	+-++?	-0.0130631	0.4633	-+-+-	0.00242592	0.4191	-+++?	-0.0104746	0.3421	----?	0.109545	0.0001688	+++++	0.0868401	0.02035
36	COL6A5	rs16827675	3	130428488	intron	C	0.027	2	1.55092	0.0003128	+?+++	1.01126	0.008338	+?-++	-0.344083	0.4301	+?--+	-1.24396	0.06785	-?--+	2.90167	0.05135	+?++?	1.26066	0.001201	+?+++	0.661287	0.002273	+?+++	0.66741	0.09246	+?-+?	0.00327286	0.941	+?-+?	0.0444538	0.2856	-?++-	0.000327455	0.9586	+?-+?	-0.0552804	0.02033	-?+-?	0.123996	0.0453	+?++-	0.111577	0.1857
37	GFM1	rs16829273	3	158664831	intron	C	0.155	2	-0.0718512	0.7095	+?-+-	0.149141	0.3806	+?-+-	-0.0253214	0.8975	+?+--	-0.086445	0.7785	-?+--	1.39421	0.04113	+?+-?	0.263961	0.1285	+?+++	0.0309165	0.7499	+?-+-	-0.153512	0.3951	+?--?	0.0158424	0.4165	-?+-?	-0.00815782	0.6535	+?-++	0.00574847	0.04177	+?++?	-0.0277134	0.01134	-?--?	-0.0124807	0.6628	+?++-	0.0234095	0.5304
38		rs7676659	4	26055991		T	0.414	2	-0.225554	0.09141	----+	-0.0869793	0.4688	+++--	-0.216572	0.1124	-+---	0.297703	0.1589	+-++-	-1.3618	0.003055	----?	-0.105321	0.3875	++---	-0.108322	0.1077	-+---	-0.149361	0.2166	--+-?	-0.00784455	0.5772	-+-+?	0.000133275	0.991	++--+	0.00117546	0.5528	--+-?	0.00174619	0.8091	-+++?	0.00323732	0.8657	-++-+	-0.0113655	0.6483
39		rs6827919	4	38389984		A	0.459	1	0.309682	0.02026	+-+++	0.164029	0.1687	+-++-	0.424557	0.001878	+++++	0.0692908	0.7431	-++--	0.467858	0.3114	+-+-?	0.345397	0.004582	+++--	0.127431	0.05857	+++--	0.140495	0.248	+-++?	0.0174692	0.2193	++++?	0.0266879	0.02404	+-+-+	0.00149345	0.453	+-+-?	-0.00177561	0.8068	-+++?	0.0214379	0.261	+--++	0.0311789	0.2096
40	DCK-SLC4A4*	rs10012631	4	71093574		G	0.054	2	-0.44518	0.1157	----+	-0.0784117	0.7572	-++++	-0.444005	0.1249	-+-++	0.657989	0.1438	++++-	-3.20612	0.001001	----?	-0.533615	0.03862	-+--+	-0.155741	0.2745	+---+	-0.25232	0.3257	---+?	0.0358611	0.2339	-++-?	0.0127778	0.6122	-+-++	-0.00227303	0.5907	-++-?	0.00295665	0.8454	+-+-?	-0.0590839	0.1557	-+-++	-0.0774211	0.1371
41	SLC4A4	rs6846301	4	71481774	intron	G	0.092	2	0.516541	0.02555	+++--	0.164813	0.4244	+++--	0.517906	0.0281	+-+-+	-0.711455	0.0512	---++	2.37903	0.002978	++++?	-0.00541271	0.9795	+---+	0.104819	0.3689	+-+-+	0.222571	0.2889	+-+-?	-0.0291455	0.2297	++--?	0.0170668	0.3993	+++-+	-0.00903495	0.008258	-+--?	0.00126431	0.9201	++--?	0.0720506	0.02659	+++++	0.074271	0.07783
42	CCSER1	rs13103126	4	90340833	intron	T	0.448	2	-0.234104	0.08081	-+-++	-0.225755	0.05883	-+---	-0.264116	0.05448	----+	0.308326	0.1462	++-++	-1.0064	0.03087	-+--?	-0.260308	0.03333	-+---	-0.0967981	0.1527	-+---	-0.0948146	0.4387	-+--?	0.0249625	0.07576	-+++?	-0.0016896	0.8861	++---	0.00233115	0.243	-++-?	0.00417482	0.5694	--++?	0.0314617	0.101	+++-+	-0.00431419	0.8623
43	CCSER1*	rs2176312	4	91608453		C	0.478	2	0.115032	0.389	++++-	-0.0579938	0.626	---+-	0.0387692	0.7763	+-+--	0.0221657	0.9165	--+-+	0.794877	0.08668	--++?	0.0537736	0.6584	--++-	0.00443519	0.9475	+-+++	-0.0336257	0.7823	+--+?	0.00621073	0.6572	--++?	0.017226	0.1478	-+++-	2.35e-05	0.9906	-+-+?	-0.000107912	0.9878	--+-?	0.0210976	0.2719	-++++	0.0117372	0.638
44		rs1460770	4	114484189		A	0.365	2	0.116229	0.3985	--++-	-0.133951	0.2786	--++-	0.109132	0.437	-+-++	0.16783	0.4404	++-++	-0.75882	0.1083	--++?	0.130995	0.2978	--+++	0.127981	0.06565	--+++	-0.159268	0.2011	--+-?	-0.00170404	0.9072	--+-?	0.0109706	0.3666	-++-+	0.00105091	0.6062	++-+?	0.0046002	0.5352	+-++?	0.00704128	0.7218	--+-+	-0.0104769	0.6831
45	USP38-GAB1*	rs300934	4	143250595		T	0.334	1	0.382811	0.007238	+++--	0.325017	0.01108	+++-+	0.134216	0.3554	++++-	-0.324866	0.1488	---++	0.979697	0.04597	+++-?	0.420021	0.001225	+-+++	0.146207	0.04186	+-+++	0.202867	0.1156	-+++?	-0.00854767	0.5673	++--?	0.0201984	0.1075	+++-+	0.000928031	0.6591	--++?	-0.014109	0.06761	----?	0.0471159	0.02101	+++-+	0.00653733	0.8073
46	FSTL5*	rs7438099	4	161343620		T	0.323	2	-0.0815028	0.5642	----+	-0.0771969	0.541	+-+--	-0.408308	0.004659	---+-	0.407152	0.0683	+-++-	-0.976334	0.04529	-+--?	-0.330969	0.01033	-+---	-0.167755	0.01873	----+	-0.323253	0.01169	----?	0.0158537	0.2887	--++?	-0.00739343	0.5535	+---+	-0.00542943	0.009645	----?	0.00434489	0.57	+-++?	-0.0313487	0.1224	+----	-0.000430083	0.9871
47	CMYA5	rs259130	5	79763725	intron	T	0.326	2	0.08681	0.5603	+?++-	0.0896173	0.4921	-?+++	-0.236505	0.1214	-?--+	-0.145719	0.5392	+?+--	0.258179	0.6301	-?++?	-0.207024	0.1238	-?-++	-0.0526431	0.4844	-?-++	-0.269266	0.05611	-?-+?	-0.0180402	0.2329	-?--?	0.000512837	0.971	+?++-	7.13e-05	0.9743	-?+-?	-0.00470641	0.5835	-?+-?	-0.00140573	0.9494	-?-++	-0.0636733	0.03103
48		rs980831	5	101415163		T	0.022	1	0.734978	0.1103	+?+-+	0.525791	0.2009	+?+--	0.602552	0.2012	+?+++	-0.0454108	0.9508	-?-++	-0.798741	0.6236	+?--?	0.0461497	0.9117	+?++-	-0.277882	0.2322	-?++-	0.868815	0.04429	+?+-?	0.0352964	0.4499	-?+-?	0.0622122	0.1529	+?++-	-0.000127932	0.9849	-?+-?	-0.0163103	0.534	-?-+?	0.292239	6.44e-06	+?+--	0.0908835	0.3139
49	EFNA5	rs152608	5	107435508	intron	A	0.247	2	0.256615	0.1034	++-+-	-0.0395788	0.7787	++---	0.337753	0.03545	+++++	-0.317162	0.2021	-++++	0.511171	0.3463	+-+-?	-0.268347	0.06198	-+---	-0.0511653	0.5187	++-+-	0.0363545	0.7985	+--+?	-0.0120995	0.4643	++--?	-0.0218924	0.1123	+----	-0.00226421	0.3309	+---?	-0.0169547	0.04636	---+?	-0.0179395	0.4301	-+--+	0.00414186	0.8879
50	ADRB2*	rs6580586	5	148863160		C	0.116	1	1.00791	9.621e-06	+?+++	0.805882	5.467e-05	+?+++	-0.533946	0.02166	-?---	0.0746468	0.837	-?+++	0.650136	0.425	+?--?	0.911878	9.412e-06	+?+++	0.494902	1.685e-05	+?+++	0.142603	0.5065	+?++?	0.0512463	0.02705	+?++?	0.0270402	0.2036	-?+--	-0.00199283	0.5523	-?+-?	-0.00653546	0.619	-?++?	0.0740557	0.02842	+?+-+	-0.00159416	0.9722
51	GLRA1*	rs10053232	5	152123786	intron	T	0.224	2	-0.209022	0.1934	--+--	-0.0119424	0.9337	++-+-	-0.117237	0.4743	-+---	-0.701185	0.005762	-+---	0.130766	0.8136	--++?	0.267682	0.06783	-++++	0.0230495	0.7752	--+++	0.0707442	0.6272	+--+?	0.0273499	0.1055	++++?	-0.0112918	0.4231	---+-	-0.0020953	0.3788	+---?	0.00275604	0.7523	-++-?	0.0326589	0.1523	--+++	0.0442916	0.1304
52	EBF1*	rs2434612	5	158595033		C	0.207	2	0.0677538	0.679	-+++-	0.252127	0.08672	++++-	-0.126727	0.4487	--+-+	-0.999667	0.0001168	----+	1.73777	0.001991	+-++?	0.0288994	0.8471	+-+-+	-0.0777339	0.3472	+-+--	0.25715	0.08298	+++-?	0.0142705	0.4182	-+++?	0.0114865	0.4295	-++--	0.000956897	0.6944	++-+?	0.00466979	0.5956	++--?	0.0681879	0.003593	+++++	0.0594883	0.05227
53	HLA-E-GNL1/PRR3	rs2844720	6	30507940		T	0.312	2	0.092908	0.5113	-+++-	0.0611512	0.6286	++++-	-0.36457	0.01152	-----	-0.212709	0.3412	+--+-	-0.713409	0.1437	-+--?	0.109653	0.3954	--+-+	0.151353	0.03369	+++-+	0.457697	0.0003538	++++?	0.0357529	0.0171	++++?	0.00588303	0.6396	--++-	-0.000552542	0.7918	+---?	0.00968351	0.2036	++++?	-0.0338985	0.09521	--++-	-0.0224545	0.3945
54	C6orf10	rs6907322	6	32357168	intron	A	0.184	1	0.189336	0.2698	+-+++	-0.210069	0.172	++---	0.46406	0.00797	+++++	0.109443	0.6865	++-+-	1.61392	0.006067	++++?	0.4194	0.007397	+-+++	0.30774	0.0003729	+-+++	0.00161855	0.9917	--++?	-0.0364505	0.04629	+---?	0.0167633	0.2735	++++-	-0.00311165	0.2209	+---?	0.0102458	0.2651	++--?	0.0117725	0.6333	++-++	0.0166271	0.6038
55	HLA-DOA-HLA-DPA1/HLA-DPB1	rs6936620	6	33016674		T	0.363	2	0.150967	0.2619	++-++	0.224694	0.06249	+++++	-0.179394	0.1914	-+--+	-0.0855104	0.6878	-++-+	-0.585326	0.2052	---+?	0.292746	0.01725	+++++	0.111063	0.1021	+++++	0.240223	0.04861	-+++?	0.0127467	0.3723	-++-?	0.0133349	0.262	++-++	-0.00582122	0.003536	---+?	0.00520182	0.4738	+-+-?	-0.0407735	0.03468	---+-	-0.0237563	0.3421
56	COL19A1	rs17690160	6	70197672	intron	A	0.055	1	-0.0115161	0.9701	++-++	0.306305	0.2658	+-+-+	-0.169966	0.5859	-+---	-0.194568	0.6883	--++-	0.0887675	0.9337	+++-?	-0.82652	0.003065	-----	-0.396227	0.01049	-+---	0.280447	0.314	+++-?	0.0691722	0.0258	+-++?	0.0516982	0.05349	+++++	-0.000971453	0.8285	+-+-?	0.0108247	0.5237	++--?	0.012112	0.7838	+-++-	0.0865284	0.1373
57	VGLL2*	rs783199	6	117229431		T	0.151	2	0.165812	0.3678	-+-++	-0.13493	0.4129	-+-+-	-0.0405165	0.8302	--++-	0.631012	0.03067	+-+++	-1.37615	0.03122	-+--?	-0.118769	0.4797	---++	-0.0765272	0.4107	----+	-0.19952	0.2355	-+-+?	0.0172189	0.3793	-++-?	-0.0120287	0.464	-+--+	-0.00289201	0.2946	---+?	-0.00222267	0.8244	---+?	0.00444654	0.8667	-++-+	-0.0172218	0.6164
58		rs9482188	6	121700736		A	0.031	2	-0.864534	0.02862	-?---	0.153643	0.6551	+?++-	-0.33311	0.4114	-?+--	1.73094	0.006032	+?++-	-2.59326	0.06702	-?--?	0.176226	0.623	+?-+-	0.338276	0.09087	+?++-	1.74152	3.734e-06	+?++?	-0.106255	0.01075	-?--?	-0.063486	0.09772	+?---	-0.000631196	0.9158	-?+-?	0.00772114	0.7307	+?+-?	-0.0604278	0.295	-?++-	0.0927369	0.204
59	HDAC9	rs1178348	7	18176753	intron	C	0.257	2	-0.00999376	0.9475	-+-+-	0.275448	0.04318	-++-+	-0.103298	0.5053	----+	-0.361845	0.1323	-----	0.0357014	0.9458	--++?	0.338208	0.01455	-++++	0.156975	0.04041	-++++	0.282606	0.04068	++-+?	0.0345263	0.03032	--+-?	0.0174298	0.1967	---++	0.00276048	0.2199	+++-?	-0.00315233	0.7029	+---?	-0.000888987	0.9673	+-+--	0.0100679	0.7235
60	CPVL	rs7785072	7	29097886	intron	A	0.497	2	-0.274585	0.04045	-+---	0.140728	0.2399	++-++	0.0841872	0.5384	++-++	0.217921	0.3046	--+++	-0.0302178	0.9481	++--?	0.0651238	0.5943	+++--	-0.0498844	0.4608	-+---	-0.0610579	0.6166	++--?	0.0349826	0.01327	+++-?	-0.0159781	0.1798	++---	-0.00204439	0.3037	+---?	0.00160236	0.827	+-++?	0.0363765	0.05985	+-+++	0.00645152	0.7979
61	TMEM248*	rs4717331	7	66913899		T	0.304	2	-0.333307	0.02489	-+--+	-0.242105	0.06958	-+---	-0.234253	0.1212	-+---	0.525622	0.02487	+-+-+	-0.565603	0.265	-+-+?	-0.252992	0.06169	----+	-0.151753	0.04227	-+--+	-0.186356	0.1626	-+-+?	-0.0216621	0.1676	-+-+?	-0.0130112	0.3158	-+--+	0.000979771	0.6523	+-+-?	-0.00675852	0.3967	--++?	-0.0402407	0.05825	---+-	-0.0154206	0.5791
62	CALCR	rs6966283	7	93539572	intron	T	0.108	2	0.150103	0.5033	-++++	0.0428976	0.8307	--++-	0.371426	0.1037	-++-+	-1.31307	0.0001938	+----	1.67632	0.03101	-+++?	-0.312407	0.1251	--+++	0.0324347	0.7737	-++-+	-0.0673384	0.7396	+-++?	-0.00773777	0.7371	-+--?	-0.00791554	0.6805	+-+--	-0.000175808	0.9573	+--+?	-0.00203437	0.8687	++--?	-0.0581323	0.07287	---++	0.00651412	0.8786
63	VGF	rs10953325	7	101162227	nearGene-3	C	0.401	2	-0.118299	0.3805	++-+-	-0.149173	0.2177	-+-+-	-0.259438	0.05897	--+-+	-0.022854	0.9145	-++-+	0.0694458	0.8809	--++?	-0.0422429	0.7314	-+-++	-0.0585748	0.389	-+-++	-0.0837952	0.4912	-+--?	0.00218468	0.8779	+++-?	-0.00688905	0.5628	---++	0.000972113	0.6255	--++?	-0.00482203	0.5075	-+-+?	-0.0105541	0.587	-+-+-	-0.00930864	0.7126
64		rs7807451	7	115825666		A	0.134	1	-0.480062	0.04792	-?-+?	-0.284257	0.23	+?-+?	0.0522197	0.8161	-?+-?	0.606972	0.09411	+?+-?	-0.454609	0.532	-?++?	-0.0951824	0.6529	+?-+?	-0.165495	0.1589	-?--?	-0.48632	0.01084	-?--?	-0.0597049	0.003555	-?--?	-0.00712348	0.7444	+?-+?	0.00193247	0.5203	+?+-?	-0.0255181	0.02766	-?+-?	0.140936	0.0002934	+?++?	0.100707	0.05454
65		rs6466686	7	118996763		G	0.356	1	0.192811	0.1667	+++++	0.0768773	0.5389	+--++	-0.29793	0.03606	-----	-0.276497	0.2096	-+---	0.248639	0.6035	-+++?	0.383988	0.002552	+++++	0.214966	0.002231	+++++	0.189391	0.1335	++-+?	0.000420689	0.9772	+---?	0.0276236	0.02435	+++++	0.0021474	0.2992	+++-?	0.0116531	0.1215	++++?	-0.00838597	0.6754	--+++	-0.0391451	0.1328
66	TSGA13	rs1038638	7	130676252	intron	C	0.461	1	-0.00638586	0.9617	+-+--	0.422205	0.0004025	+-+++	0.00154611	0.9909	+--+-	-0.172344	0.4121	-+---	3.4e-05	0.9999	+---?	0.165419	0.173	+-+-+	0.0410932	0.5401	+-+++	-0.0119291	0.921	--++?	0.00208884	0.8815	-++-?	0.00208778	0.8592	--+++	0.000676215	0.731	-++-?	0.00561005	0.4346	-+++?	0.0524013	0.006126	+++++	0.0660266	0.007939
67	CNTNAP2	rs700278	7	146492560	intron	T	0.458	2	-0.137559	0.3033	--+--	-0.00536125	0.9643	-++-+	0.144929	0.2883	++--+	-0.01736	0.9345	+--+-	-0.103997	0.8213	-+--?	0.0207002	0.8652	-+-++	0.0207092	0.7586	-+-++	-0.148864	0.2188	----?	-0.00137422	0.9225	--+-?	0.000219616	0.9852	+++--	-0.00164209	0.4083	+--+?	0.0163881	0.02304	++++?	-0.0196412	0.3055	----+	0.00767215	0.7575
68	BIN3-EGR3*	rs3893402	8	22679688		G	0.321	2	-0.0275772	0.846	++-++	-0.134925	0.2887	+--+-	0.0760408	0.5998	+---+	0.0335758	0.881	-+-++	-0.352084	0.4738	++--?	0.0348653	0.7877	++--+	0.0276255	0.6998	++--+	0.0827102	0.5212	+-++?	-0.00126728	0.9312	+--+?	-0.0431448	0.0005739	+----	-0.00131896	0.5305	+---?	0.00172306	0.824	-+++?	0.00174975	0.9316	+--++	0.0147996	0.5754
69	RP1	rs10103201	8	54530554	intron	A	0.377	1	-0.134855	0.3199	-----	0.199172	0.1006	+-+++	-0.378922	0.006095	-+---	-0.221265	0.3017	-+-+-	-0.277345	0.5527	++-+?	-0.367402	0.002977	---+-	-0.226809	0.0009071	-----	-0.0868603	0.4792	---+?	-0.0125005	0.3815	----?	-0.030876	0.009955	+----	-0.00193412	0.3353	--+-?	-0.0135318	0.06448	--++?	0.0112077	0.5645	-+--+	0.0116816	0.6423
70	XKR9	rs2732091	8	71006188	intron	T	0.493	1	0.059239	0.6549	-+++-	0.133779	0.261	++-++	0.304503	0.02436	+++++	-0.237919	0.2565	-+---	1.97443	1.553e-05	++++?	0.266695	0.02738	++++-	0.187272	0.005063	+-+++	0.0695669	0.5621	-+++?	0.00541526	0.6974	++++?	0.0291276	0.01298	+-+++	0.00209842	0.2858	++++?	0.00521385	0.4669	+-++?	0.00329596	0.8633	--+-+	0.0579489	0.01956
71	SLC24A2	rs7851478	9	19653532	intron	G	0.294	1	0.143544	0.3206	-++++	-0.30535	0.01829	-----	-0.176323	0.2314	-+--+	0.384663	0.09226	++-++	-1.69819	0.0006434	----?	-0.0786642	0.5504	-++-+	0.0251542	0.73	+-+-+	-0.219543	0.09377	---+?	-0.00320796	0.8335	--++?	0.0143317	0.2628	+++-+	0.00146049	0.4948	++++?	0.000949046	0.9031	--++?	-0.0650177	0.001834	-----	-0.0506782	0.06067
72		rs3928808	9	32278893		A	0.345	2	0.320996	0.02294	+++-+	-0.139429	0.2701	+-+--	0.0959502	0.5051	++-++	-0.839727	0.0001637	---+-	1.06628	0.02816	+++-?	0.094724	0.4628	--++-	-0.0167287	0.8143	--+++	-0.0750318	0.557	-++-?	-0.00303565	0.8403	--++?	0.00965275	0.441	--+-+	-0.00107764	0.6078	-+-+?	-0.0059361	0.4349	-+--?	0.0272082	0.1776	+-+++	0.0569424	0.02931
73	FBP2	rs2987900	9	94593188	intron	G	0.057	2	0.136782	0.6215	+-+--	0.0368271	0.8832	--+-+	-0.289879	0.3041	-+--+	0.302065	0.4909	++-+-	-1.43601	0.1259	----?	0.326903	0.1963	-++--	0.187202	0.1803	+++--	-0.00465821	0.9851	-+++?	-0.0601614	0.04068	-+-+?	-0.0170223	0.4893	+++--	-0.00921415	0.02456	-+--?	0.0301672	0.03907	++++?	-0.0156056	0.7002	-+-+-	0.101474	0.04479
74	ABCA1	rs4149313	9	103022369	missense, ncRNA	C	0.141	2	-0.115955	0.6286	++-??	0.035078	0.8846	+-+??	0.95126	2.412e-05	+++??	1.44208	6.276e-05	+++??	0.0199809	0.9777	--+??	-0.163748	0.4377	--+??	-0.0831092	0.4757	+--??	-0.150775	0.4117	---??	-0.0436676	0.03121	+--??	-0.00845919	0.6813	+-+??	0.00164597	0.5944	++-??	0.00163086	0.8813	++-??	0.0512093	0.1465	+-+??	0.0458889	0.3126
75	ABCA1	rs10820738	9	104828835	intron	G	0.068	2	0.122323	0.6734	-?+-+	-0.178361	0.4877	+?+--	0.723318	0.01462	+?++-	1.26001	0.006343	+?++-	-0.70151	0.5015	-?+-?	0.431997	0.09879	-?+-+	-0.00860996	0.9531	-?--+	-0.211931	0.4372	-?+-?	-0.0834715	0.003675	-?-+?	0.0125751	0.6363	+?+-+	-0.000768659	0.8558	+?-+?	0.0165506	0.3308	+?-+?	0.0205407	0.6393	-?+++	-0.0111026	0.8464
76	LPAR1	rs1476946	9	111102469		C	0.332	1	0.231796	0.1019	+-++-	0.397513	0.001712	+++-+	0.118764	0.4108	++++-	-0.222653	0.3198	----+	1.21184	0.0132	++++?	0.184	0.1542	+-++-	0.090994	0.2025	++++-	0.270499	0.03466	++++?	0.0239866	0.1043	-++-?	0.0357845	0.004004	-++++	0.00167555	0.4235	-+++?	-0.0172689	0.02441	----?	0.0146194	0.4708	-++--	-0.0307573	0.2451
77		rs1340131	10	16261811		T	0.028	2	0.60378	0.1337	+?++-	0.323893	0.3536	+?++-	0.39659	0.3361	-?+++	-1.54758	0.01555	-?---	0.672094	0.6539	+?+-?	1.09448	0.002473	+?+-+	0.576673	0.004611	-?+-+	-0.145486	0.7052	-?++?	0.0295621	0.4364	-?++?	0.0123196	0.7363	+?-+-	-7.39e-05	0.99	+?--?	-0.0381968	0.119	-?--?	0.109729	0.054	+?++-	-0.0784998	0.2949
78		rs7127823	11	28939160	intron	T	0.382	2	-0.259133	0.05918	++-+-	-0.148857	0.2262	-+-+-	-0.176721	0.2078	-+---	0.518339	0.0172	+-++-	-1.19055	0.01205	-+--?	-0.312193	0.01277	---++	-0.125494	0.07009	---+-	-0.0806401	0.5171	+---?	-0.0287002	0.04879	+---?	-0.0240066	0.0475	+----	-3.63e-05	0.9858	+--+?	-0.0121842	0.1004	----?	-0.00893048	0.6485	-+-+-	-0.0208568	0.4129
79	ARL14EP-MPPED2*	rs1222210	11	30340578		A	0.201	1	-0.414875	0.01031	-+-+-	-0.232884	0.1079	---+-	-0.359055	0.02971	-+---	0.209455	0.4137	+-+--	-1.32562	0.01786	----?	-0.212752	0.1491	-+--+	-0.152127	0.06218	----+	-0.244545	0.09667	----?	-0.029613	0.08057	----?	-0.0445428	0.001907	-----	-0.00225566	0.3475	----?	0.0134679	0.126	+-++?	0.00899212	0.7021	-+--+	-0.024564	0.4227
80	SHANK2	rs10459038	11	71135915	intron	C	0.485	2	0.112085	0.3994	-++-+	-0.179364	0.1301	-+---	0.116873	0.3898	+++++	0.22364	0.2878	+-+--	-0.76458	0.09726	-+--?	0.0168897	0.8893	-+++-	0.0695084	0.3002	+++--	-0.0407385	0.7364	--+-?	0.013458	0.338	+-++?	0.0166023	0.1586	+++-+	0.000469081	0.8126	-++-?	0.0122886	0.08856	+++-?	0.00572966	0.7634	---++	-0.0165336	0.5038
81	NTM	rs2442100	11	131429821	intron	C	0.047	2	-0.0175762	0.004022	-?---	0.292789	0.825	-?+-+	0.564405	0.1971	-?-++	-0.0623558	0.04558	+?-++	0.991595	0.01731	-?+-?	-0.23244	0.3903	-?+-+	0.0388917	0.02105	-?---	-0.0271654	0.4194	-?+-?	-0.0735214	0.02587	-?+-?	-0.0269013	0.1478	-?---	0.00472301	0.04189	-?--?	-0.00785177	0.7228	+?--?	0.0876595	0.9755	-?--+	0.0364038	0.02028
82	SLCO1B7	rs11045743	12	21089365	intron	G	0.045	2	0.14692	0.6909	+?-++	0.543453	0.09396	+?-++	-0.00357099	0.9924	-?+++	-0.935728	0.1085	-?+--	-0.040644	0.9754	+?-+?	0.367292	0.2709	+?-+-	-0.0420547	0.8215	+?-+-	-0.283208	0.4136	+?-+?	0.0173206	0.64	-?+-?	-0.0326805	0.3316	-?-++	0.0017056	0.7504	+?--?	-0.033993	0.112	-?++?	0.123996	0.02186	+?+++	0.202615	0.004629
83	FGD4	rs7315682	12	32533023	nearGene-5	A	0.144	2	0.222792	0.2369	+++--	0.14428	0.3924	+++--	-0.106366	0.5794	---++	-0.616687	0.03796	---++	-1.03546	0.1117	-+--?	0.40135	0.01934	++++-	0.155224	0.1022	+-++-	0.192666	0.2577	++++?	-0.0459859	0.01959	+---?	0.0169516	0.3055	+++++	-9.69e-05	0.9722	+-+-?	-0.0124097	0.2259	---+?	0.00721287	0.7908	+----	-0.00550008	0.8763
84	RBM19*	rs11066861	12	113982465		A	0.057	2	-1.27352	3.093e-06	-----	-0.78547	0.001339	+----	0.506056	0.06988	+++++	1.15804	0.007477	-++++	-0.996611	0.2922	--+-?	-0.289026	0.2451	++--+	-0.221164	0.1078	-+---	-0.139198	0.573	+---?	-0.033195	0.245	-+-+?	-0.0311279	0.1962	++--+	-0.000107616	0.9788	++-+?	0.0234983	0.112	++-+?	-0.0158558	0.688	+---+	-0.00278815	0.9565
85	CDK2AP1	rs1109559	12	123273314	nearGene-5	C	0.324	1	0.0733241	0.6298	-?+-+	-0.293077	0.02765	-?---	0.726616	3.15e-06	+?+++	0.923011	0.0001437	+?+++	-0.558541	0.3084	-?--?	-0.0958505	0.4861	-?--+	-0.0472935	0.5384	+?--+	-0.0380498	0.7918	+?--?	0.0273952	0.08001	+?+-?	0.0217831	0.1291	-?+++	0.0033013	0.1438	+?+-?	0.00469545	0.5947	+?--?	-0.0105682	0.6431	-?-++	0.0104208	0.7295
86		rs9506931	13	22814989		G	0.267	1	0.130482	0.3862	++++-	0.101531	0.4519	+-++-	0.0604659	0.6943	--+++	-0.609224	0.01058	-----	1.5682	0.002629	++++?	0.31919	0.01996	+++++	0.237882	0.001732	+++++	0.342163	0.01228	+-++?	0.00518327	0.741	--++?	-0.0195809	0.141	----+	-0.00234785	0.2922	---+?	0.00163408	0.8415	-++-?	0.0255293	0.2392	-++++	0.0159717	0.5697
87	PDX1-CDX2*	rs2504220	13	27945217		T	0.114	2	-0.314693	0.1218	----+	-0.177508	0.3292	-+---	-0.361232	0.08186	---+-	0.452284	0.1599	++++-	-1.73154	0.01362	----?	-0.408354	0.02773	+---+	-0.0961097	0.3486	++---	0.123609	0.5021	+++-?	-0.03779	0.07681	++--?	-0.0537728	0.002736	-----	0.00163466	0.5891	--++?	-0.00977787	0.3722	--++?	-0.0123663	0.671	---++	-0.0904961	0.02048
88	DGKH	rs9315885	13	42068674	intron	G	0.365	2	-0.41166	0.003384	-----	-0.0986526	0.4346	-+--+	-0.010238	0.9431	++-++	0.408577	0.06568	++++-	-1.10573	0.02241	-+--?	-0.372792	0.003615	-+--+	-0.186471	0.008412	----+	0.0610669	0.6301	++--?	-0.0377986	0.01108	+---?	-0.0123567	0.3158	+---+	0.000345237	0.8681	++--?	-0.00677741	0.3712	-+--?	-0.00648976	0.7459	--+++	-0.0286373	0.2734
89	DGKH	rs670676	13	42127603	intron	T	0.208	2	-0.27644	0.4427	-++--	-0.0115589	0.5168	--+--	0.0232628	0.9698	--+++	0.0204883	0.2728	++++-	-0.448761	0.134	--+-?	-0.141938	0.9533	+-+--	-0.125412	0.9222	--+--	0.0376694	0.2263	--+-?	-0.0514867	0.003391	-+++?	-0.0189819	0.7414	-++--	-0.000173985	0.2541	--+-?	-0.0175876	0.3389	++--?	0.0285482	0.2827	--++-	-0.00877323	0.871
90		rs359412	13	64653337		C	0.495	2	-0.127899	0.3363	+--+-	-0.0480095	0.6868	-++--	-0.0461347	0.7345	--+-+	0.159912	0.4473	+--+-	-0.0307646	0.9467	-++-?	-0.0754048	0.5343	+----	-0.077085	0.2511	-+---	-0.172981	0.1526	-++-?	-0.0339536	0.01572	---+?	0.0111232	0.3439	++--+	-0.000933359	0.6367	---+?	-0.00315425	0.6627	-++-?	-0.0365422	0.05579	-++--	-0.0585058	0.01859
91		rs4903274	14	40055761		C	0.296	2	0.118615	0.4149	-+++-	0.241109	0.06382	-++-+	-0.184376	0.2128	---++	-0.230295	0.3159	+---+	0.145853	0.7716	-+++?	0.270857	0.04061	--+++	0.0730025	0.3187	-++++	-0.0574985	0.6624	--++?	-0.00229532	0.8792	-+++?	0.00794664	0.5395	+-+--	0.00198031	0.3559	--++?	-0.0198023	0.01198	----?	0.00598792	0.7759	-+-++	-0.00507132	0.8535
92	FUT8*	rs4899173	14	65326450		T	0.227	2	0.101376	0.5266	+----	-0.0304124	0.8311	+---+	0.237856	0.1454	-++++	0.0969983	0.7016	-++++	0.132308	0.8129	--+-?	0.119255	0.4129	++-++	0.0434885	0.5903	++---	0.153981	0.2921	+-+-?	-0.0317553	0.05423	-+-+?	0.00808125	0.5674	+-+--	0.000984884	0.6775	+-+-?	-0.0225153	0.01087	----?	0.0273174	0.2288	+-++-	0.109536	0.000219
93		rs7151718	14	86428552		T	0.068	2	0.24999	0.01892	??+++	0.0462451	0.5808	??-++	0.265484	0.8031	??-+-	0.378401	0.1158	??+-+	2.21619	0.1564	??++?	0.150075	0.6988	??++-	-0.308751	0.9121	??-++	0.0956459	0.7936	??-+?	-0.0736725	0.01266	??-+?	0.0187317	0.9883	??-+-	0.0082432	0.1095	??++?	-0.0170143	0.5903	??+-?	0.0440472	0.5307	??++-	-0.0257289	0.1696
94	RYR3	rs2217807	15	33491010	intron	G	0.427	1	-0.317479	0.01878	+----	-0.137732	0.2564	+----	0.283749	0.03903	+++++	0.485408	0.02283	-++++	-0.553187	0.232	+---?	-0.151715	0.2184	----+	-0.118171	0.0827	-+--+	0.0344191	0.7777	+++-?	0.0258313	0.06951	+-++?	-0.0354329	0.003052	-----	-0.0010275	0.6069	-+--?	0.00524477	0.469	-+++?	-0.0298422	0.126	-----	-0.0120528	0.6359
95	SHF	rs3959644	15	45195934	intron	A	0.35	2	0.428674	0.002038	+++-+	0.290531	0.01964	+++-+	-0.0980691	0.4892	--+--	-0.459431	0.03645	+----	0.756044	0.1147	+++-?	0.0739089	0.5598	+-+--	0.0615639	0.3804	+-++-	0.213041	0.0909	-++-?	-0.00102402	0.9439	++-+?	0.0136433	0.2666	--+++	-0.000798157	0.6985	-+-+?	0.0129481	0.08518	+-++?	-0.00393602	0.8435	+-++-	0.0199934	0.4378
96	ATP8B4*	rs626744	15	49760008		C	0.026	2	-0.815281	0.04052	---+-	0.883527	0.01347	+-+++	-0.022863	0.9551	+--+-	-0.578155	0.359	-++--	-0.262937	0.8475	+--+?	-0.0664361	0.8548	--+--	-0.0402516	0.8411	--+-+	0.468708	0.1953	+-++?	0.0226799	0.5983	+-++?	0.0162247	0.6534	+-+++	0.00606296	0.305	++++?	-0.0155604	0.47	-+--?	0.069924	0.2102	+--+-	-0.0280647	0.7146
97	SALL1*	rs7499584	16	51205506		A	0.297	1	-0.132111	0.4434	+--+?	0.431142	0.01164	+-++?	0.133292	0.4064	++++?	-0.0740598	0.7736	--+-?	0.127018	0.8024	++-+?	0.0908122	0.5517	-++-?	0.0331926	0.6916	-+--?	0.051359	0.7002	+++-?	0.0224608	0.1392	-++-?	-0.0328657	0.02321	+---?	-0.00190709	0.3779	-+--?	0.0144954	0.06999	++++?	0.0513733	0.05406	-+++?	0.0341633	0.3254
98	MT3-MT2A*	rs12444489	16	56597022		A	0.223	2	0.102076	0.5255	+--++	0.205231	0.1559	+--++	-0.0907576	0.5798	+--+-	-0.349302	0.1696	-++--	0.288828	0.6024	++--?	-0.352228	0.01624	+---+	-0.221193	0.006364	-----	-0.0977217	0.5013	++--?	0.00324302	0.8459	+++-?	-0.0191454	0.1729	++-+-	0.00427031	0.07147	++++?	0.012283	0.1598	++++?	0.0100869	0.6622	+---+	-0.0129986	0.6662
99		rs2057827	16	66235992		C	0.165	2	0.583058	0.00138	+++++	0.275463	0.09229	+-+-+	0.23344	0.2097	-++++	-0.425373	0.1401	---++	1.62711	0.009059	+++-?	0.470735	0.004751	+-+-+	0.145148	0.1148	+-+++	-0.110463	0.5023	+-+-?	-0.0412432	0.03404	+--+?	0.0440733	0.005973	+++++	0.00266967	0.3194	--+-?	-0.0235824	0.01567	----?	0.0279289	0.2817	-++-+	0.0237016	0.4791
100	CYB5B	rs246134	16	69440614	intron	T	0.416	2	-0.0841039	0.5315	++---	-0.225867	0.06034	++---	0.174827	0.2025	-++++	0.127018	0.5504	--++-	-0.513815	0.268	-+--?	-0.327387	0.007617	-+---	-0.0529778	0.4346	++---	-0.245725	0.04372	+--+?	-0.0464159	0.001171	---+?	-0.0304804	0.01043	++--+	-0.00335594	0.09318	--+-?	-0.00979412	0.1767	---+?	0.0018177	0.9249	-+-++	0.0167086	0.5045
101	GLP2R-RCVRN*	rs874307	17	9894757		G	0.271	1	0.386626	0.07054	---++	0.46443	0.0316	-+-++	0.18135	0.3709	-+-+-	-0.0529186	0.7952	++--+	0.756258	0.7182	-+-+?	0.382327	0.03098	---++	0.188288	0.09561	---++	0.441874	0.005006	-+-+?	-0.0063336	0.5557	++++?	0.0163866	0.9788	-+-+-	0.000579571	0.2612	-+++?	0.0192338	0.1668	-+-+?	-0.00581782	0.3543	-+---	-0.0187228	0.3336
102	MAPT	rs11079727	17	45899447	intron	T	0.167	2	-0.186137	0.3101	-?-+-	0.0161905	0.9196	-?++-	0.117636	0.5307	+?-++	-0.0940421	0.747	+?---	0.611307	0.3555	-?++?	0.399972	0.01552	+?+++	0.0284352	0.7587	-?-++	-0.0406085	0.8146	-?++?	0.0151445	0.4146	-?++?	0.0106918	0.5356	-?+--	-0.0035518	0.1915	-?--?	0.0256604	0.01556	+?++?	-0.00610192	0.8222	+?-+-	-0.0248815	0.4957
103		rs7213039	17	51433911	nearGene-5	T	0.221	2	0.0214437	0.6337	-+++-	-0.0491182	0.1352	+-+++	-0.0560031	0.1414	+++++	0.232312	0.1832	-+-+-	-1.09633	0.00146	++++?	0.0127321	0.01343	--+++	0.00478863	0.005362	-++++	0.0800706	0.2265	+-++?	0.00386319	0.7816	+---?	0.00552265	0.06418	-+++-	0.00676109	0.8415	-+-+?	-0.000301639	0.393	+---?	0.0164614	0.6564	-++++	-0.0208306	0.7309
104		rs312750	17	70347398		C	0.498	2	-0.315602	0.04296	-+-+?	-0.0185125	0.9049	++-+?	0.275211	0.05821	++++?	0.193318	0.4052	+-+-?	0.534623	0.2418	++-+?	0.0329525	0.8117	-+-+?	0.0534741	0.4798	-+-+?	0.195934	0.1022	++++?	-0.0206644	0.1384	++--?	-0.0106668	0.408	+--+?	0.00302811	0.1226	+--+?	0.00720728	0.3132	+++-?	-0.0304915	0.199	-+-+?	-0.0298736	0.3312
105	RNF157	rs11539879	17	76166467	missense,nc transcript variant	A	0.043	2	-0.156972	0.6192	-?-+-	-0.72056	0.009859	-?-+-	0.0736765	0.8208	-?+++	-0.946335	0.06103	-?---	1.11923	0.321	-?++?	0.102045	0.7222	-?+++	0.234751	0.1429	+?-++	-0.249807	0.4052	-?++?	-0.023276	0.4812	+?-+?	-0.0164122	0.5892	-?+-+	-0.00700806	0.139	-?--?	0.051902	0.004262	+?++?	-0.0351765	0.4646	-?-++	-0.0125767	0.843
106	PTPRM	rs1031116	18	7861458	intron	T	0.047	2	0.347554	0.3302	+?-++	0.394698	0.2069	+?-++	-0.460382	0.2069	-?--+	-0.753559	0.1854	-?+--	2.36013	0.06771	+?-+?	-0.29078	0.3684	-?---	-0.196756	0.2769	-?---	-0.141029	0.6769	+?--?	-0.048194	0.1762	-?--?	-0.0116533	0.7214	-?+--	0.00293034	0.577	+?++?	-0.0194062	0.3566	+?--?	0.0904139	0.07448	+?-++	0.0179054	0.7932
107	MPPE1/GNAL-IMPA2*	rs4797589	18	11917411	intron	A	0.45	2	-0.402631	0.00275	-----	0.0423819	0.7244	--+++	0.0930805	0.4979	-++++	0.578003	0.006546	+++++	-0.684621	0.1413	----?	-0.165587	0.1771	-+--+	-0.0258762	0.7022	--+-+	-0.237446	0.05192	-+--?	-0.0173166	0.2235	-+--?	-0.0198115	0.09389	+--+-	0.00135218	0.4978	+++-?	0.0076712	0.2954	+++-?	-0.0283269	0.1443	-+--+	-0.0251637	0.3178
108	LDLRAD4	rs7231732	18	13554311	intron	C	0.224	2	0.0296985	0.86	+?+--	0.275358	0.06228	+?+--	-0.303045	0.0786	-?--+	-0.651199	0.01525	-?-++	1.00763	0.09519	+?--?	-0.140328	0.3564	+?---	0.0380269	0.6547	+?++-	0.340502	0.03211	+?++?	0.018184	0.2861	+?++?	-0.00945688	0.5526	-?+--	0.003235	0.1949	+?++?	-0.00329004	0.7339	-?++?	0.00263384	0.9166	+?-+-	0.0323982	0.3293
109		rs10048286	18	44454280	intron	A	0.192	2	-0.252753	0.1355	-+---	-0.320118	0.03503	-++--	-0.412301	0.01704	-----	0.236354	0.3777	+--++	-1.36689	0.01845	--+-?	-0.180334	0.2434	-+---	0.00712685	0.9342	-+--+	-0.27078	0.07708	-+--?	0.0315285	0.08015	--+-?	-0.0339174	0.02361	+----	-0.000260293	0.9173	+-++?	0.0118133	0.1928	+-++?	-0.0260192	0.2864	-++--	-0.0132572	0.6752
110		rs4433895	18	76663057	nearGene-5	C	0.435	2	0.0825693	0.5408	-+++-	0.206982	0.0883	-+++-	-0.393929	0.004275	-+---	-0.267383	0.2115	++--+	-0.595362	0.1994	-+-+?	0.0136624	0.9117	--++-	-0.00307776	0.9639	--++-	-0.109273	0.3716	--++?	-0.00859929	0.5478	--++?	0.0212685	0.07641	+++-+	-0.00160768	0.4212	+---?	0.00736551	0.3119	++++?	0.000355845	0.9854	--+--	-0.0303124	0.2314
111	UQCRFS1*	rs10408404	19	29248822		A	0.342	2	-0.0728819	0.6036	-+-++	-0.280312	0.02553	-+---	0.096519	0.5006	-++--	0.875249	8e-05	+++++	-1.11329	0.02138	-++-?	-0.150692	0.2396	--+--	-0.0613482	0.3853	+-+--	-0.210311	0.09859	----?	-0.00511398	0.7325	-+--?	0.00868155	0.4862	--+++	-0.00185387	0.3752	----?	0.00875015	0.2463	+++-?	0.0079272	0.6932	-++-+	0.0037631	0.8852
112	ZNF283	rs11673332	19	43835290	intron	G	0.12	2	-0.649743	0.0009792	---+-	-0.329013	0.06349	--++-	0.123537	0.5393	--++-	0.752524	0.01584	-++++	-1.0133	0.1375	-+--?	-0.232867	0.1949	-+++-	0.0260812	0.7929	-+++-	0.118233	0.5072	-+++?	0.0415277	0.04389	++++?	-0.0240833	0.17	-+-+-	0.00130603	0.6562	+--+?	-0.00957117	0.3678	+---?	-0.00428743	0.8776	+--+-	0.015359	0.6771
113	MICAL3	rs9605473	22	17980500	intron, nearGene-3	C	0.243	2	0.0687726	0.6507	+--+-	-0.048361	0.7225	+--+-	0.162447	0.2946	--+-+	-0.0908062	0.7053	-+-++	-0.322514	0.5377	-++-?	0.111063	0.4232	--+++	0.0692863	0.3657	--+++	-0.322343	0.01933	----?	0.00367888	0.8186	+--+?	-0.0123216	0.3604	+----	0.000291681	0.8973	+++-?	0.00950332	0.247	++++?	0.00297706	0.8912	+----	0.0238149	0.4009
114		rs8136986	22	47891569		A	0.198	2	-0.196544	0.2288	-+---	-0.0578314	0.6918	--+++	-0.280993	0.09168	---++	0.462049	0.07314	+-++-	-1.45796	0.009984	---+?	0.0402264	0.7869	-++-+	-0.0652261	0.4278	----+	-0.436866	0.003163	----?	-0.0137885	0.4218	-++-?	-0.0132001	0.3581	+----	0.00373194	0.1238	+-+-?	0.00848397	0.3384	+--+?	-0.0364155	0.121	--++-	-0.0686037	0.02671
115		rs11090806	22	48002740		T	0.057	1	0.764124	0.005477	+++++	0.354151	0.153	++++-	0.314434	0.2625	+-++-	-0.000313363	0.9994	-++--	2.05826	0.02854	++++?	0.977492	9.712e-05	+++-+	0.566161	4.316e-05	+++-+	0.305548	0.2181	+++-?	0.00700084	0.8104	+--+?	0.0196294	0.4223	+++-+	0.00972209	0.01719	++++?	0.00545291	0.7101	+++-?	0.00724951	0.8525	++-+-	0.0213877	0.6804
Chr = chromosome; Location = location in base pairs; EA = effect allele; EAF = EA frequency.
Quantitative markers: blood glucose (BG); body mass index (BMI); C-reactive protein (CRP); creatinine; diastolic blood pressure (DBP); forced vital capacity (FVC); heart rate (HR); hematocrit (HC); high-density lipoprotein cholesterol (HDL-C); systolic blood pressure (SBP); total cholesterol (TC); and triglycerides (TG).
Risk outcomes: Alzheimer’s disease and related dementias (AD), atrial fibrillation (AF); cancer; coronary heart disease (CHD); diabetes mellitus (DM); death; heart failure (HF); and stroke.
1 If an index SNP was not within protein coding gene, the closest gene was assigned. Multiple genes were assigned if they were at about the same distance up- and downstream from the index SNP or if the index SNP was within the region of overlapping genes.
2 Proxy SNPs with linkage disequilibrium (LD) r2>70% were excluded. LD with r2>1% for SNPs within ±1Mb flanking region retained in the table is given in Supplementary Table 2.
* Protein coding genes within ±100 Kb flanking region for the index SNP.
[truncated: 19 more columns]

## Sheet: Supplementary Table 5B
Supplementary Table 5B. P-values from the univariate meta-analysis of the associations of SNPs from Table 2 with 20 phenotypes in pathway 1a using Fisher's test.
ID	Gene(s)1	SNP2	Chr	Location	SNP function	EA	EAF	Pathway	P_BMI	P_BG	P_TC	P_HDL-C	P_TG	P_SBP	P_DBP	P_HR	P_HC	P_CRP	P_Creatinine	P_FVC	P_CHD	P_HF	P_stroke	P_DM	P_cancer	P_death	P_AF	P_AD
1	CLCN6	rs17376328	1	11816605	intron	A	0.051	2	0.246313	0.106525	0.637457	0.00478889	0.191811	7.34e-05	2.01e-05	0.638474	0.993822	0.815398	0.145899	0.113252	0.0409059	0.188331	0.761246	0.951598	0.416401	0.0265773	0.0230443	0.700366
2	NKAIN1-SNRNP40/ZCCHC17*	rs7549339	1	31249319		A	0.218	2	0.000248221	0.0112659	0.78852	0.00743375	0.00699796	0.765412	0.894189	0.291017	0.0013555	0.230638	0.338373	0.183466	0.0440381	0.307882	0.339093	0.60912	0.693937	0.0618836	0.136606	0.100909
3	TINAGL1-SERINC2*	rs16834550	1	31530916		A	0.125	2	0.00373883	0.00953328	0.449487	0.0152974	0.0455017	0.000570622	0.00180293	0.0212612	0.475378	0.273766	0.622256	0.0388901	0.609414	0.859549	0.494764	0.770364	0.303176	0.764898	0.0968959	0.2558
4	CSMD2	rs10914845	1	34022514	intron	C	0.499	1	0.173412	0.342537	0.0419831	0.0592786	0.104576	0.24832	0.97343	0.554132	0.921789	0.91648	0.432575	0.207197	0.103657	0.0876382	0.38472	0.000801937	0.406251	0.12763	0.110792	0.76708
5		rs7551194	1	38680229		A	0.249	1	0.0912669	0.0595326	0.137023	0.496783	0.0425125	0.506612	0.510361	0.207635	0.721394	0.0674221	0.199251	0.888002	0.810424	0.768882	0.444481	0.0260544	0.383559	0.600794	0.0379857	0.503184
6	AKIRIN1/NDUFS5-MACF1*	rs7554809	1	39038206	intron	A	0.168	2	0.0327735	0.463017	0.0500727	0.000761206	0.373778	0.13283	0.16393	0.178601	0.30416	0.0728188	0.829915	0.525278	0.029211	0.381055	0.772501	0.532066	0.467584	0.807141	0.195182	0.992603
7		rs778405	1	56237741		A	0.493	2	0.000827802	0.133516	0.968613	0.166274	0.300526	0.000331136	0.102641	0.383958	0.076793	0.373046	0.153496	0.987882	0.826417	0.508582	0.0779491	0.306827	0.671949	0.86913	0.32345	0.941876
8	PTGER3	rs1327464	1	70900555	intron	A	0.339	1	0.446723	0.465045	0.169793	0.75807	0.00090078	0.0210907	0.00172578	0.173353	0.0910291	0.00765059	0.735413	0.213236	0.106084	0.584021	0.971351	0.00711499	0.432992	0.911837	0.287194	0.224353
9		rs17105569	1	80872915		A	0.136	1	0.0662674	0.86118	0.926716	0.592273	0.467612	0.0680072	0.0544036	0.0180646	0.0381306	0.0885059	0.884925	0.287408	0.212471	0.399085	0.704769	0.308104	0.32283	0.336168	0.447727	0.91007
10	RNPC3/AMY2B-AMY2A*	rs4847151	1	103581040		T	0.365	2	0.0295284	0.0463148	0.707455	0.000807019	0.623828	0.655237	0.331077	0.511592	0.102661	0.95452	0.788924	0.779794	0.919946	0.0304826	0.203317	0.566872	0.229937	0.140487	0.767827	0.614223
11	NTNG1	rs7542677	1	107319431	intron	T	0.1	2	0.942376	0.676501	0.523184	0.0239635	0.192621	0.0850749	0.326662	0.00129931	0.074619	0.103494	0.246467	0.000870566	0.685081	0.501895	0.842777	0.726856	0.3973	0.283742	0.459419	0.3302
12	FCRL4-FCRL3*	rs1969742	1	157643547		C	0.317	2	0.00194383	0.0421488	0.0536788	0.00726586	0.0517044	0.131005	0.132055	0.202485	0.0127248	0.572381	0.798397	0.799057	0.661238	0.653447	0.032574	0.00139337	0.567916	0.837778	0.0588303	0.964759
13	OLFML2B	rs2490420	1	161994746	UTR-3	G	0.31	2	0.0706977	0.481232	0.902223	0.476561	0.126531	0.174609	0.0755659	0.166958	0.638147	0.00327268	0.599118	0.247187	0.266296	0.696177	0.212672	0.0336905	0.012418	0.104947	0.387041	0.217777
14	PRRX1	rs9426908	1	170674846	intron	C	0.069	2	0.605547	0.233982	0.0180057	0.000376159	0.00309252	0.980944	0.446103	0.202393	0.753309	0.490465	0.0994116	0.742994	0.000127546	0.0738951	0.629802	0.456983	0.953284	0.0207367	0.0352572	0.74422
15	KCNH1	rs1934628	1	210739125	intron	G	0.164	2	8.97e-05	0.00104471	0.140609	0.0438571	0.0164482	0.482211	0.607966	0.916825	0.284294	0.157036	0.965547	0.271865	0.729178	0.0562053	0.622922	0.0844291	0.153298	0.440758	0.398299	0.68509
16	ESRRG	rs1436879	1	216909043	intron	A	0.041	2	0.31597	0.0626362	0.0920817	0.0304007	0.0166402	0.0954094	0.114831	0.483269	0.0757768	0.590092	0.791573	0.027013	0.000985284	0.00187663	0.084901	0.461102	0.410805	0.643111	0.314931	0.804946
17	GREB1	rs7596162	2	11604106	intron	C	0.196	1	0.616988	0.106123	0.48216	0.508083	0.839732	0.0158857	0.0385316	0.00323477	0.0222113	0.158156	0.18096	0.399	0.424133	0.712851	0.406211	0.146431	0.00907162	0.0522219	0.222315	0.315574
18	SDC1-LAPTM4A*	rs11685359	2	20149672		T	0.137	1	0.65456	0.772133	0.424301	0.583299	0.35169	0.000149881	0.0283081	0.0510095	0.00210504	0.614934	0.630056	0.611413	0.265942	0.169005	0.519745	0.0461429	0.707714	0.270716	0.336737	0.475677
19	ADCY3-DNAJC27*	rs10182181	2	24927427		C	0.472	2	0.000131911	0.0231638	0.823071	0.0922807	0.0873849	0.183964	0.215211	0.545403	0.288383	0.00596957	0.845881	0.151161	0.171306	0.824144	0.231974	0.442839	0.199914	0.227947	0.184626	0.087911
20	CAPN13	rs10173959	2	30806079	intron	A	0.297	2	0.200628	0.00201029	0.304908	0.253909	0.0429597	0.358221	0.45507	0.0491699	0.450494	0.0407452	0.724903	0.294768	0.0858861	0.157129	0.519532	0.0359022	0.400189	0.753907	0.0268433	0.192298
21	CAPN13	rs10176484	2	30806230	UTR-5	A	0.304	2	0.203982	0.00580054	0.414786	0.259499	0.0263442	0.283512	0.290475	0.0509904	0.512023	0.0507059	0.549868	0.204396	0.0748923	0.263687	0.402776	0.0284449	0.2979	0.608432	0.0632745	0.465839
22		rs10495824	2	34525478		C	0.247	2	0.411062	0.130818	0.446806	0.00212627	0.0235194	0.143879	0.236698	0.158374	0.261941	0.930742	0.645592	0.128382	0.004135	0.295309	0.770669	0.983651	0.279192	0.598611	0.354839	0.26871
23	THADA	rs17334919	2	43480246	intron	A	0.1	2	0.0836296	0.00461336	0.0566657	0.000359686	0.00589234	0.479066	0.295326	0.132625	0.0470574	0.15896	0.649026	0.999719	0.584359	0.11855	0.967854	0.0130559	0.48673	0.0208325	0.0264311	0.243525
24	EPAS1	rs10191091	2	46346071	intron	G	0.498	2	0.00577507	0.0341317	0.04115	0.0302124	0.0655172	0.000209063	0.0208377	0.170179	0.0194308	0.72729	0.940823	0.453726	0.163165	0.333335	0.543766	0.769772	0.0893044	0.691594	0.726097	0.062208
25	ANTXR1	rs4255990	2	69046532	intron	C	0.062	2	0.0155671	0.0361947	0.175681	0.179886	0.984223	0.0116673	0.414183	0.0793909	0.0512176	0.31079	0.574394	0.0666559	0.00987186	0.101106	0.0575813	0.316179	0.530133	0.161983	0.000341174	0.641369
26	DNAH6	rs11889456	2	84619559	intron	C	0.077	1	0.907765	0.111772	0.224246	0.748166	0.56327	0.0422249	0.00645383	0.0059384	0.61087	0.483287	0.628518	0.0656407	0.142952	0.447136	0.000992825	0.0382665	0.119291	0.279339	0.667156	0.179975
27	MGAT5	rs755503	2	134386883	intron	A	0.427	2	0.0481019	0.891911	0.021798	0.246096	0.0860097	0.5982	0.107961	0.000984109	0.153594	0.629347	0.0115437	0.661734	0.702638	0.0200293	0.978509	0.698979	0.409761	0.660345	0.627644	0.0691808
28	TMEM163	rs503562	2	134502500	intron	G	0.474	2	0.00110026	0.206098	0.141125	6.06e-05	0.0397159	0.734138	0.519811	0.0818038	0.137314	0.789969	0.46943	0.00382494	0.764292	0.300121	0.291998	0.0195168	0.780258	0.86008	0.560746	0.574988
29	TMEM163	rs666614	2	134532882	intron	G	0.416	1	0.0602715	0.068272	0.00102062	0.245601	0.966808	0.00190678	0.225106	0.0185902	0.000113941	0.749228	0.273579	0.000584132	0.340722	0.345469	0.0475153	0.337036	0.899626	0.143871	0.634719	0.236873
30	UBXN4	rs6430585	2	135749357	intron	A	0.253	2	0.0825378	0.239136	0.000788363	0.10427	0.196666	0.481126	0.241599	2.58e-05	0.0282689	0.866489	0.966952	0.106028	0.0137277	0.165385	0.288839	0.437257	0.438813	0.212844	0.0511905	0.166631
31	CCDC141	rs12693171	2	178883720	intron	A	0.132	2	0.0159033	0.848372	0.0889074	0.0472115	0.141918	0.00485421	0.0194202	5.46e-07	0.0279261	0.600421	0.380663	0.241229	0.347317	0.526484	0.723968	0.707148	0.337583	0.486389	0.378741	0.445482
32		rs6781156	3	5811612		T	0.394	1	0.229702	0.0525741	0.443329	0.146329	0.3254	0.00934865	0.0595329	0.416401	0.542731	0.410804	0.625005	0.450803	0.0107904	0.411042	0.285553	0.0460873	0.217751	0.653129	0.0172891	0.923467
33	CCK*	rs11129950	3	42273095		C	0.15	2	0.074275	0.0426371	0.870996	0.00534223	0.145861	0.00345538	0.00213841	0.0193692	0.17724	0.236729	0.77651	0.292211	0.294138	0.546069	0.0422478	0.058378	0.315093	0.229399	0.0729367	0.622745
34	WNT5A/ERC2*	rs751194	3	55453400		T	0.46	2	0.0800053	0.0963365	0.0604526	0.140915	0.317485	0.454259	0.238017	0.873011	0.557922	0.899562	0.229493	0.163969	0.769216	0.194891	0.82653	0.00490584	0.0536985	0.529245	0.964307	0.817258
35	FHIT	rs1716721	3	60696259	intron	A	0.126	2	0.171031	0.089663	0.153512	0.0357892	0.294403	0.134771	0.0377349	0.113599	0.185735	0.724966	0.287793	0.503784	0.000601299	0.00826393	0.0412583	0.0321233	0.820221	0.346584	0.0116236	0.33928
36	COL6A5	rs16827675	3	130428488	intron	C	0.027	2	0.000782013	0.0161141	0.268685	0.169933	0.155089	0.0235544	0.0349979	0.00177319	0.394399	0.584177	0.924504	0.0312387	0.00362961	0.0535626	0.912365	0.0765071	0.0964831	0.0866555	0.160413	0.840424
37	GFM1	rs16829273	3	158664831	intron	C	0.155	2	0.0102393	0.0124875	0.0156795	0.142503	0.043525	0.446197	0.58613	0.000281816	0.179791	0.780968	0.129755	0.0909059	0.765992	0.066469	0.117999	0.0297731	0.799989	0.479178	0.425691	0.643972
38		rs7676659	4	26055991		T	0.414	2	0.154644	0.687288	0.497182	0.0116349	0.00406002	0.429344	0.17646	0.652899	0.11967	0.295253	0.364605	0.328362	0.977589	0.836808	0.983785	0.850921	0.477348	0.309516	0.933295	0.425733
39		rs6827919	4	38389984		A	0.459	1	0.0437421	0.0274197	0.0531301	0.531965	0.463897	0.00125106	0.00104038	0.463082	0.237487	0.0313535	0.847176	0.716614	0.163969	0.486776	0.837728	0.311198	0.573699	0.487935	0.153662	0.363402
40	DCK-SLC4A4*	rs10012631	4	71093574		G	0.054	2	0.092109	0.0620526	0.0245271	0.244619	0.0139802	0.0389755	0.207737	0.189403	0.592481	0.464788	0.591506	0.798172	0.0767377	0.527059	0.935818	0.0288137	0.0791157	0.934363	0.18561	0.827221
41	SLC4A4	rs6846301	4	71481774	intron	G	0.092	2	0.0006683	0.0280747	0.0341944	0.0286416	0.0342381	0.582771	0.26597	0.62473	0.173748	0.0217302	0.0498854	0.893013	0.156676	0.194931	0.806199	0.000930769	0.219187	0.817187	0.467908	0.36624
42	CCSER1	rs13103126	4	90340833	intron	T	0.448	2	0.0169141	0.0229925	0.344795	0.275849	0.211619	0.0853608	0.700652	0.831023	0.0639192	0.499761	0.105494	0.0190877	0.275705	0.668811	0.876758	0.0551329	0.350031	0.40756	0.199614	0.688456
43	CCSER1*	rs2176312	4	91608453		C	0.478	2	0.358774	0.395073	0.1595	0.00914285	0.0023253	0.180085	0.121678	0.547002	0.306334	0.594512	0.470951	0.348297	0.261549	0.180185	0.146959	0.339315	0.314139	0.660226	0.161421	0.558133
44		rs1460770	4	114484189		A	0.365	2	0.00130273	0.0121419	0.35042	0.00751832	0.0186045	0.00168714	0.00266747	0.524254	0.0311718	0.316267	0.928248	0.644181	0.227584	0.600141	0.63669	0.728242	0.00400863	0.935601	0.974141	0.336268
45	USP38-GAB1*	rs300934	4	143250595		T	0.334	1	0.00448491	0.00835754	0.883696	0.128374	0.0291962	0.00123838	0.120955	0.166347	0.488974	0.0503608	0.0500108	0.349952	0.0261256	0.611039	0.0892842	0.20449	0.614079	0.929757	0.394149	0.65468
46	FSTL5*	rs7438099	4	161343620		T	0.323	2	0.290722	0.719797	0.0382503	0.0623057	0.183288	0.0318009	0.18577	0.0553254	0.00188302	0.154025	0.0813233	0.0145215	0.634959	0.457932	0.571886	0.529387	0.734401	0.853793	0.743737	0.109335
47	CMYA5	rs259130	5	79763725	intron	T	0.326	2	0.320593	0.183059	0.0705649	0.452759	0.818102	7.92e-06	0.0070367	0.134668	0.683515	0.952491	0.703478	0.48403	0.893819	0.0647856	0.544398	0.319307	0.0134313	0.0406308	0.859785	0.0737725
48		rs980831	5	101415163		T	0.022	1	0.473169	0.240449	0.750651	0.939411	0.589895	0.12665	0.130571	0.0763456	0.416595	0.55302	0.137222	0.0493826	1.28e-06	0.137172	0.638087	0.110347	0.0615357	0.00252551	0.214317	0.951165
49	EFNA5	rs152608	5	107435508	intron	A	0.247	2	0.067482	0.0394901	0.243527	0.0171057	0.250854	0.124148	0.109137	0.515011	0.68474	0.486785	0.474414	0.247422	0.397873	0.909148	0.785569	0.628623	0.151841	0.894568	0.558933	0.638672
50	ADRB2*	rs6580586	5	148863160		C	0.116	1	0.000165567	0.00119739	0.169216	0.643599	0.0501206	0.000190452	0.000210471	0.572032	0.174082	0.0272569	0.350002	0.42351	0.105629	0.917264	0.476652	0.00253727	0.767633	0.802388	0.407837	0.843973
51	GLRA1*	rs10053232	5	152123786	intron	T	0.224	2	0.0106936	0.993864	0.81081	0.000402528	0.388837	0.00886263	0.0709697	0.522373	0.431511	0.293648	0.816493	0.62219	0.123846	0.0159982	0.412985	0.887271	0.8367	0.646283	0.627152	0.642762
52	EBF1*	rs2434612	5	158595033		C	0.207	2	0.174543	0.0521059	0.752745	3.7e-05	0.00365678	0.201229	0.287376	0.463908	0.250674	0.80847	0.303212	0.622408	0.0663192	0.217448	0.162733	0.212037	0.0140659	0.453897	0.630245	0.444964
53	HLA-E-GNL1/PRR3	rs2844720	6	30507940		T	0.312	2	0.0604437	0.248885	0.061479	0.00961891	0.501104	0.0907849	0.137824	0.0017457	0.0406814	0.53721	0.50211	0.625806	0.0312958	0.0464813	0.747977	0.0465977	0.739791	0.689943	0.413259	0.745429
54	C6orf10	rs6907322	6	32357168	intron	A	0.184	1	0.225675	0.619546	0.106357	0.4306	0.00749607	0.0318384	0.00264307	0.708165	0.0540034	0.831223	0.0174246	0.567362	0.974695	0.385904	0.340609	0.0499354	0.874083	0.0474987	0.608789	0.639589
55	HLA-DOA-HLA-DPA1/HLA-DPB1	rs6936620	6	33016674		T	0.363	2	0.0223808	0.0622468	0.298013	0.338926	0.134705	0.0818711	0.439257	0.0109064	0.442594	0.0440281	0.0170751	0.776165	0.11239	0.734303	0.721497	0.0305778	0.0877443	0.809281	0.804261	0.645809
56	COL19A1	rs17690160	6	70197672	intron	A	0.055	1	0.992184	0.0414127	0.42005	0.943604	0.230494	0.0361192	0.0133623	0.108958	0.121406	0.305161	0.233023	0.816283	0.717837	0.402534	0.141306	0.0959258	0.0312186	0.739555	0.296921	0.633557
57	VGLL2*	rs783199	6	117229431		T	0.151	2	0.000906293	0.117431	0.876121	0.0542685	0.0302949	0.00397414	0.340946	0.123783	0.351187	0.299368	0.772652	0.924467	0.507914	0.807791	0.693984	0.671733	0.860429	0.895322	0.116994	0.735191
58		rs9482188	6	121700736		A	0.031	2	0.0801021	0.926362	0.718032	0.00339992	0.0501404	0.0801187	0.000935556	5.46e-05	0.0712428	0.14577	0.305138	0.76257	0.0802003	0.18344	0.445263	0.448465	0.0610586	0.129839	0.604951	0.210271
59	HDAC9	rs1178348	7	18176753	intron	C	0.257	2	0.615602	0.116087	0.749048	0.68694	0.798769	0.0206682	0.0917947	0.00287334	0.147404	0.0283069	0.25412	0.683139	0.682363	0.659201	0.320067	0.0802959	0.493808	0.0908976	0.335509	0.24337
60	CPVL	rs7785072	7	29097886	intron	A	0.497	2	0.107386	0.0805033	0.0125886	0.0132967	0.000131521	0.964712	0.566534	0.143132	0.0365787	0.347736	0.204514	0.230567	0.291158	0.987334	0.0747508	0.367131	0.0903579	0.281566	0.723704	0.513445
61	TMEM248*	rs4717331	7	66913899		T	0.304	2	0.00111828	0.104382	0.0382437	0.138746	0.331787	0.128739	0.0245244	0.0294927	0.24584	0.274692	0.820666	0.624795	0.49586	0.38351	0.177085	0.273001	0.000117113	0.491952	0.0871744	0.265062
62	CALCR	rs6966283	7	93539572	intron	T	0.108	2	0.0272815	0.134346	0.0752118	0.000107405	0.00157681	0.0263902	0.0650261	0.743322	0.459667	0.988035	0.0573651	0.539513	0.249984	0.175013	0.436625	0.233956	0.697091	0.781419	0.578527	0.280592
63	VGF	rs10953325	7	101162227	nearGene-3	C	0.401	2	0.000224485	0.00336798	0.0564706	0.268387	0.534801	0.749913	0.242519	0.00563153	0.514563	0.152219	0.775769	0.856593	0.134708	0.0508274	0.228356	0.000788021	0.382503	0.0392426	0.110508	0.493055
64		rs7807451	7	115825666		A	0.134	1	0.0335242	0.0511983	0.325094	0.0567882	0.369623	0.581802	0.535242	0.0668011	0.0388037	0.053448	0.757424	0.0210683	0.00212383	0.146424	0.132511	0.0457578	0.596656	0.00969256	0.741571	0.200911
65		rs6466686	7	118996763		G	0.356	1	0.764905	0.0587775	0.24838	0.576519	0.450342	0.0133761	0.0312884	0.378332	0.0753817	0.0984938	0.158858	0.60239	0.881428	0.388323	0.407367	0.21665	0.555155	0.966431	0.387357	0.554396
66	TSGA13	rs1038638	7	130676252	intron	C	0.461	1	0.357123	0.000799963	0.818869	0.257174	0.0154447	0.459188	0.442224	0.947934	0.961161	0.352219	0.312312	0.816301	0.0860953	0.072664	0.348113	0.0406481	0.264193	0.722223	0.934983	0.699748
67	CNTNAP2	rs700278	7	146492560	intron	T	0.458	2	0.237768	0.483675	0.525473	0.00327014	0.021908	0.0507614	0.484842	0.544087	0.863284	0.060916	0.0834493	0.204961	0.191995	0.815671	0.835475	0.727783	0.14998	0.206828	0.479847	0.730319
68	BIN3-EGR3*	rs3893402	8	22679688		G	0.321	2	0.00845426	0.274653	0.848937	0.2306	0.341197	0.00488437	0.0315288	0.155711	0.512947	0.0274369	0.43666	0.955421	0.017689	0.0261634	0.297469	0.729397	0.0710329	0.00980795	0.914209	0.178655
69	RP1	rs10103201	8	54530554	intron	A	0.377	1	0.890021	0.241402	0.0722362	0.705119	0.0756537	0.00728238	0.0167596	0.663408	0.456113	0.113211	0.000497309	0.219587	0.736951	0.475536	0.117231	0.0824648	0.655176	0.875439	0.0886796	0.732019
70	XKR9	rs2732091	8	71006188	intron	T	0.493	1	0.435565	0.490157	0.135291	0.440997	0.000359676	0.233433	0.0705736	0.289072	0.756449	0.0756793	0.533946	0.49825	0.559871	0.0749311	0.978786	0.974663	0.0515933	0.0603432	0.810979	0.716961
71	SLC24A2	rs7851478	9	19653532	intron	G	0.294	1	0.630016	0.0535553	0.178215	0.303086	0.00704027	0.402266	0.769076	0.0134562	0.423946	0.8228	0.947513	0.0982222	0.0284749	0.384184	0.2937	0.127646	0.505176	0.373241	0.79988	0.850803
72		rs3928808	9	32278893		A	0.345	2	0.0963021	0.130939	0.971618	0.00354744	0.131818	0.37815	0.0182281	0.0632672	0.876753	0.451033	0.406116	0.0525363	0.151568	0.1062	0.512999	0.257521	0.309327	0.161474	0.596663	0.344273
73	FBP2	rs2987900	9	94593188	intron	G	0.057	2	0.344882	0.959654	0.0838914	0.535354	0.457986	0.00447517	0.163766	0.746079	0.113138	0.273431	0.0134751	0.0696935	0.159298	0.267277	0.663338	0.333645	0.333668	0.162195	0.277829	0.364563
74	ABCA1	rs4149313	9	103022369	missense, ncRNA	C	0.141	2	0.74238	0.565301	0.00023175	0.000720986	0.258516	0.473817	0.755745	0.822723	0.00171857	0.779059	0.787022	0.435246	0.184142	0.214473	0.00396754	0.221696	0.0781648	0.796557	0.561705	0.754609
75	ABCA1	rs10820738	9	104828835	intron	G	0.068	2	0.529404	0.797061	0.00814687	0.0139399	0.126504	0.030452	0.445593	0.0557006	0.00995554	0.72482	0.827554	0.0273016	0.395249	0.0815768	0.258626	0.25127	0.103325	0.638734	0.0936796	0.50854
76	LPAR1	rs1476946	9	111102469		C	0.332	1	0.166594	0.0397818	0.845716	0.605017	0.107829	0.109265	0.107288	0.265856	0.194084	0.0404092	0.614757	0.130775	0.845786	0.655091	0.449357	0.0681858	0.790019	0.534937	0.628653	0.904406
77		rs1340131	10	16261811		T	0.028	2	0.319352	0.000527806	0.442623	0.112021	0.875696	0.00771219	0.00132066	0.21706	0.530443	0.29125	0.505584	0.355666	0.112973	0.0115247	0.232619	0.109165	0.618438	0.00765145	0.281083	0.170642
78		rs7127823	11	28939160	intron	T	0.382	2	0.000887698	0.29122	0.575346	0.0226119	0.0145278	0.00840814	0.0188559	0.140266	0.00411645	0.353164	0.0287987	0.491264	0.241522	0.356139	0.154478	0.612533	0.205581	0.650586	0.0346435	0.408998
79	ARL14EP-MPPED2*	rs1222210	11	30340578		A	0.201	1	0.0824626	0.143998	0.134801	0.294541	0.148779	0.642092	0.208564	0.501636	0.63348	0.00888925	0.668141	0.275907	0.306346	0.0993727	0.164651	0.087573	0.663543	0.0991834	0.901607	0.342676
80	SHANK2	rs10459038	11	71135915	intron	C	0.485	2	0.301836	0.208182	0.914342	0.128069	0.165603	0.785388	0.530354	0.0605358	0.162188	0.546522	0.955757	0.00179422	0.537948	0.569412	0.0178454	0.557455	0.83444	0.842853	0.929687	0.709482
81	NTM	rs2442100	11	131429821	intron	C	0.047	2	0.0165025	0.29383	0.523084	0.0561577	0.0039842	0.0440457	0.0225742	0.400109	0.0278986	0.317707	0.174695	0.563994	0.248732	0.196446	0.878299	0.0323446	0.32203	0.382566	0.62708	0.785344
82	SLCO1B7	rs11045743	12	21089365	intron	G	0.045	2	1.67e-06	0.19236	0.0868396	0.00089664	0.725271	0.307964	0.116754	0.465136	0.872254	0.00142489	0.677988	0.255882	0.045052	0.00553522	0.266109	0.521196	0.726522	0.0410441	0.0902767	0.228732
83	FGD4	rs7315682	12	32533023	nearGene-5	A	0.144	2	0.171525	0.135691	0.991063	0.00711747	0.0226587	0.0346465	0.068651	0.811226	0.0534767	0.830875	0.228362	0.692775	0.341271	0.436507	0.0814929	0.984453	0.560239	0.0505197	0.0975142	0.360346
84	RBM19*	rs11066861	12	113982465		A	0.057	2	1.23e-05	0.00420715	0.506062	0.00492786	0.292912	0.0270663	0.0245347	0.535984	0.628638	0.389643	0.906528	0.238847	0.184643	0.108996	0.991076	0.0102562	0.0388774	0.895871	0.265496	0.492719
85	CDK2AP1	rs1109559	12	123273314	nearGene-5	C	0.324	1	0.579634	0.12191	4.86e-05	0.00259653	0.704374	0.1012	0.23271	0.796311	0.269081	0.417239	0.158428	0.733602	0.335721	0.677327	0.254097	0.119455	0.722172	0.862404	0.540243	0.555186
86		rs9506931	13	22814989		G	0.267	1	0.912954	0.881425	0.962511	0.131051	0.00951987	0.245285	0.00978074	0.0581576	0.159137	0.621601	0.48953	0.276721	0.815567	0.656816	0.0479744	0.84514	0.058618	0.927523	0.772016	0.494181
87	PDX1-CDX2*	rs2504220	13	27945217		T	0.114	2	0.333351	0.342153	0.240327	0.0838445	0.0195904	0.0114919	0.272151	0.530247	0.0354282	0.0531908	0.341269	0.339312	0.205426	0.0663804	0.856062	0.900567	0.438104	0.325006	0.552833	0.0128052
88	DGKH	rs9315885	13	42068674	intron	G	0.365	2	0.0396077	0.275627	0.498776	0.180702	0.00445652	0.000229576	0.00622019	0.06245	0.0104675	0.18946	0.423174	0.150145	0.203422	0.711473	0.0181688	0.119977	0.183086	0.690891	0.36472	0.21527
89	DGKH	rs670676	13	42127603	intron	T	0.208	2	0.117869	0.0750838	0.481468	0.446863	0.00277145	0.021299	0.0152794	0.10348	0.00587169	0.0911994	0.140836	0.142006	0.376619	0.618158	0.0464559	0.474981	0.0264921	0.0466334	0.550306	0.261535
90		rs359412	13	64653337		C	0.495	2	0.0593633	0.116514	0.781003	0.0489176	0.00570768	0.722634	0.539698	0.463977	0.0843474	0.796874	0.872052	0.573857	0.116269	0.0381844	0.159546	0.157644	0.709854	0.0580806	0.885786	0.4872
91		rs4903274	14	40055761		C	0.296	2	0.0475201	0.0865106	0.0306135	0.00217173	0.071681	0.0365955	0.0312787	0.840723	0.0175841	0.552882	0.546518	0.00842895	0.1582	0.897675	0.678103	0.250964	0.514502	0.766634	0.523034	0.115304
92	FUT8*	rs4899173	14	65326450		T	0.227	2	0.477467	0.15245	0.328702	0.617361	0.710091	0.0373708	0.378716	0.00192238	0.0307576	0.442337	0.262361	0.0140711	0.0471698	0.000850481	0.301577	0.0917265	0.227182	0.0349651	0.637675	0.759888
93		rs7151718	14	86428552		T	0.068	2	0.0205371	0.538915	0.646327	0.0115593	0.131986	0.88915	0.170557	0.161043	0.033358	0.0199756	0.228113	0.0120247	0.0711734	0.465905	0.93047	0.776812	0.702805	0.54324	0.0961929	0.498468
94	RYR3	rs2217807	15	33491010	intron	G	0.427	1	0.0245878	0.139274	0.293043	0.0312938	0.422471	0.0415416	0.00681285	0.954341	0.441459	0.0130954	0.50418	0.0804478	0.704303	0.487836	0.182273	0.541141	0.611399	0.44816	0.942406	0.887355
95	SHF	rs3959644	15	45195934	intron	A	0.35	2	0.0264537	0.0116328	0.559731	0.193743	0.0811139	0.396667	0.427166	0.0640734	0.417354	0.755286	0.94536	0.174168	0.623544	0.920137	0.333577	0.302629	0.436343	0.00460858	0.413642	0.0605702
96	ATP8B4*	rs626744	15	49760008		C	0.026	2	0.0941332	0.0234164	0.385687	0.66308	0.00142139	0.895646	0.998441	0.108467	0.00815606	0.374438	0.867681	0.0131758	0.00170695	0.679943	0.224053	0.0788018	0.0309174	0.0210049	0.993803	0.00598045
97	SALL1*	rs7499584	16	51205506		A	0.297	1	0.0940709	0.0640313	0.876188	0.796793	0.955972	0.220448	0.0623693	0.961947	0.122754	0.191208	0.596171	0.35906	0.00157396	0.119156	0.114263	1.53e-05	0.300862	0.655192	0.669388	0.399758
98	MT3-MT2A*	rs12444489	16	56597022		A	0.223	2	0.0540871	0.00342649	0.361534	0.0308154	0.0350107	0.000376027	0.0299652	0.150819	0.946994	0.152403	0.368096	0.416052	0.00128949	0.202017	0.15885	0.519133	0.666184	0.671435	0.816712	0.113179
99		rs2057827	16	66235992		C	0.165	2	0.0226023	0.011825	0.51074	0.0527601	0.0114988	0.0266481	0.164101	0.0239585	0.0830527	0.0635453	0.18543	0.00106303	0.582231	0.814477	0.432212	0.181876	0.837068	0.14079	0.574215	0.00179629
100	CYB5B	rs246134	16	69440614	intron	T	0.416	2	0.0747778	0.0760447	0.635625	0.00948974	0.196937	0.0472408	0.675504	0.0229885	0.0153746	0.00181495	0.129039	0.558717	0.960811	0.164212	0.271689	0.165664	0.805487	0.955164	0.275481	0.0748633
101	GLP2R-RCVRN*	rs874307	17	9894757		G	0.271	1	0.0642601	0.00161832	0.256253	0.730173	0.2039	0.0346961	0.0665557	0.00473157	0.527023	0.235178	0.479719	0.0186329	0.21928	0.726818	0.371717	0.204953	0.494603	0.157476	0.376672	0.371566
102	MAPT	rs11079727	17	45899447	intron	T	0.167	2	0.55781	0.301616	0.454382	0.0861124	0.0123496	0.0128359	0.118407	0.216849	0.198584	0.37274	0.570717	0.000983065	0.135038	0.189638	0.152872	0.0236329	0.821964	0.0074558	0.433028	0.486198
103		rs7213039	17	51433911	nearGene-5	T	0.221	2	0.44776	0.256098	0.642026	0.776473	0.0111281	0.00395013	0.0130632	0.0991133	0.856435	0.056017	0.000679987	0.5202	0.142962	0.874192	0.248335	0.397158	0.315502	0.373509	0.179942	0.048827
104		rs312750	17	70347398		C	0.498	2	0.00344472	0.409552	0.360868	0.0255396	0.0735172	0.148383	0.246619	0.204968	0.208853	0.167983	0.153445	0.832686	0.176542	0.553492	0.512941	0.169581	0.212386	0.848441	0.0436373	0.00242579
105	RNF157	rs11539879	17	76166467	missense,nc transcript variant	A	0.043	2	0.844364	0.00341639	0.561579	0.136287	0.029714	0.775393	0.258037	0.0394089	0.595746	0.775883	0.434972	0.0385214	0.0198168	0.017154	0.118342	0.0214416	0.914927	0.217477	0.245084	0.500655
106	PTPRM	rs1031116	18	7861458	intron	T	0.047	2	0.146855	0.0336751	0.315239	0.00461152	0.0187771	0.830619	0.443608	0.807243	0.182019	0.893838	0.917675	0.0906905	0.045763	0.671386	0.77754	0.167592	0.410914	0.796815	0.275652	0.474164
107	MPPE1/GNAL-IMPA2*	rs4797589	18	11917411	intron	A	0.45	2	0.0495125	0.096968	0.761542	0.0234299	0.115929	0.381962	0.213954	0.0842151	0.235206	0.537896	0.317842	0.526038	0.291237	0.164965	0.0450483	0.347011	0.977301	0.390098	0.151095	0.38973
108	LDLRAD4	rs7231732	18	13554311	intron	C	0.224	2	0.124866	0.00101198	0.0395346	0.00191599	0.00364116	0.645488	0.877297	0.180251	0.3109	0.73644	0.474264	0.0447631	0.0759455	0.450824	0.708884	0.00457287	0.347005	0.0897038	0.260674	0.486017
109		rs10048286	18	44454280	intron	A	0.192	2	0.11599	0.131476	0.157242	0.0357114	0.0037835	0.266054	0.318745	0.247504	0.142429	0.0221257	0.580867	0.5068	0.170107	0.485604	0.714093	0.882511	0.0166196	0.519767	0.634406	0.694255
110		rs4433895	18	76663057	nearGene-5	C	0.435	2	0.138541	0.087284	0.000680556	0.0117203	0.454386	0.104464	0.368028	0.114428	0.0726034	0.507113	0.372691	0.484931	0.0330696	0.63086	0.497353	0.257922	0.485769	0.77157	0.0377648	0.865091
111	UQCRFS1*	rs10408404	19	29248822		A	0.342	2	0.467982	0.014114	0.102409	0.00478015	0.0695396	0.444826	0.71225	0.489492	0.826304	0.407493	0.893143	0.3922	0.501867	0.621956	0.662373	0.0226003	0.486028	0.313648	0.881576	0.724193
112	ZNF283	rs11673332	19	43835290	intron	G	0.12	2	0.00141644	0.108885	0.00455179	0.0498886	0.595033	0.0982971	0.20133	0.0723479	0.302785	0.289189	0.937307	0.228947	0.937717	0.936256	0.481408	0.052855	0.834362	0.747767	0.457343	0.870223
113	MICAL3	rs9605473	22	17980500	intron, nearGene-3	C	0.243	2	0.0192246	0.589599	0.135469	0.896051	0.861459	0.257334	0.0218666	0.162469	0.427992	0.84018	0.299443	0.584931	0.722618	0.300556	0.643545	0.0859821	0.265713	0.00136131	0.386151	0.281338
114		rs8136986	22	47891569		A	0.198	2	0.705518	0.0564769	0.0473632	0.0898593	0.0518147	0.702629	0.788273	0.0390815	0.0692095	0.914154	0.0169883	0.0918992	0.572497	0.224914	0.745346	0.285009	0.279116	0.372807	0.067635	0.155865
115		rs11090806	22	48002740		T	0.057	1	0.0697684	0.376304	0.39631	0.773789	0.160415	0.00182052	0.000368799	0.672597	0.585194	0.951706	0.144086	0.280448	0.168883	0.231745	0.647727	0.979379	0.827229	0.0788067	0.679441	0.15213
Chr = chromosome; Location = location in base pairs; EA = effect allele; EAF = EA frequency.
Quantitative markers: blood glucose (BG); body mass index (BMI); C-reactive protein (CRP); creatinine; diastolic blood pressure (DBP); forced vital capacity (FVC); heart rate (HR); hematocrit (HC); high-density lipoprotein cholesterol (HDL-C); systolic blood pressure (SBP); total cholesterol (TC); and triglycerides (TG).
Risk outcomes: Alzheimer’s disease and related dementias (AD), atrial fibrillation (AF); cancer; coronary heart disease (CHD); diabetes mellitus (DM); death; heart failure (HF); and stroke.
1 If an index SNP was not within protein coding gene, the closest gene was assigned. Multiple genes were assigned if they were at about the same distance up- and downstream from the index SNP or if the index SNP was within the region of overlapping genes.
2 Proxy SNPs with linkage disequilibrium (LD) r2>70% were excluded. LD with r2>1% for SNPs within ±1Mb flanking region retained in the table is given in Supplementary Table 2.
* Protein coding genes within ±100 Kb flanking region for the index SNP.
