# Supplementary material for: Strong impact of natural-selection–free heterogeneity in genetics of age-related phenotypes
Source: Aging (Albany NY). 2018 Mar 29;10(3):492–514. doi: 10.18632/aging.101407 (PMC5892700; doi:10.18632/aging.101407)
Supplement: Supplementary Table 6 [file aging-10-101407-s005.xlsx]

## Sheet: Supplementary Table 6
Supplementary Table 6. The results of pleiotropic meta-analysis for SNPs from Table 2 in each phenotypic domain.
								Pathway	Meta p-values for 12M domain				Meta p-values for 8DD domain				Meta p-values for 20P domain
ID	Gene(s)1	SNP2	Chr	Location	SNP function	EA	EAF	1	PMOp	PMOb	PMFp	PFcFp	PMOp	PMOb	PMFp	PFcFp	PMOp	PMOb	PMFp	PFcFp
								2	POpFc	PObFc		PFpFc	POpFc	PObFc		PFpFc	POpFc	PObFc		PFpFc
1	CLCN6	rs17376328	1	11816605	intron	A	0.051	2	6.89e-15	1.21e-05		2.83e-07	0.104	0.366		0.0397	1.46e-14	1.85e-05		5.92e-07
2	NKAIN1-SNRNP40/ZCCHC17*	rs7549339	1	31249319		A	0.218	2	4.89e-10	3.69e-15		2.74e-06	0.521	0.402		0.0387	1.39e-06	3.67e-14		6.25e-08
3	TINAGL1-SERINC2*	rs16834550	1	31530916		A	0.125	2	4.17e-10	5.48e-09		1.04e-08	0.871	0.924		0.718	3.93e-07	1.66e-07		4.13e-07
4	CSMD2	rs10914845	1	34022514	intron	C	0.499	1	0.151	0.108	0.0819	0.144	0.0136	0.000315	0.00157	0.00253	2.23e-08	0.00173	0.00141	0.00397
5		rs7551194	1	38680229		A	0.249	1	2.55e-08	0.0399	0.000216	0.0392	0.891	0.789	0.79	0.19	8.59e-05	0.146	0.00422	0.0314
6	AKIRIN1/NDUFS5-MACF1*	rs7554809	1	39038206	intron	A	0.168	2	2.55e-08	4.16e-05		0.0013	0.834	0.702		0.321	0.00127	0.00117		0.00771
7		rs778405	1	56237741		A	0.493	2	1.38e-11	2.34e-05		4.2e-06	0.833	0.736		0.587	0.000368	0.00264		1.29e-05
8	PTGER3	rs1327464	1	70900555	intron	A	0.339	1	2.37e-16	0.00117	7.39e-07	2.04e-05	0.818	0.59	0.483	0.118	1.35e-05	0.0107	1.52e-05	3e-05
9		rs17105569	1	80872915		A	0.136	1	1.8e-09	0.00606	0.000296	0.0136	0.361	0.0234	0.175	0.582	1.96e-06	0.00252	0.000478	0.0476
10	RNPC3/AMY2B-AMY2A*	rs4847151	1	103581040		T	0.365	2	2.68e-08	0.00019		0.0205	0.296	0.196		0.185	1.04e-09	0.000548		0.0145
11	NTNG1	rs7542677	1	107319431	intron	T	0.1	2	2.99e-09	1.94e-06		0.000608	0.908	0.965		0.639	1.95e-06	0.000122		0.006
12	FCRL4-FCRL3*	rs1969742	1	157643547		C	0.317	2	1.58e-12	1.6e-08		4.71e-05	0.105	0.121		0.0517	1.14e-06	1.85e-09		4.13e-06
13	OLFML2B	rs2490420	1	161994746	UTR-3	G	0.31	2	0.00131	0.0749		0.0182	0.058	0.0599		0.014	2.49e-08	0.0102		0.00292
14	PRRX1	rs9426908	1	170674846	intron	C	0.069	2	0.00419	2.78e-06		0.00542	0.000233	0.00486		3.2e-05	5.97e-07	7.58e-10		2.24e-05
15	KCNH1	rs1934628	1	210739125	intron	G	0.164	2	8.52e-10	1.98e-07		1.78e-05	0.509	0.429		0.15	2.47e-07	2.79e-06		7.77e-06
16	ESRRG	rs1436879	1	216909043	intron	A	0.041	2	2.38e-08	2.46e-06		0.00139	0.0518	0.0221		0.00256	1.68e-07	8.21e-09		6.72e-07
17	GREB1	rs7596162	2	11604106	intron	C	0.196	1	3.83e-08	0.000203	3.02e-06	0.000925	0.357	0.0852	0.208	0.0263	6.99e-06	7.92e-05	1.24e-05	0.000172
18	SDC1-LAPTM4A*	rs11685359	2	20149672		T	0.137	1	2.8e-09	0.00404	6.86e-06	0.000749	0.238	0.173	0.154	0.193	8.69e-08	0.000896	1.65e-05	0.00117
19	ADCY3-DNAJC27*	rs10182181	2	24927427		C	0.472	2	8.48e-10	3.73e-06		4.44e-05	0.649	0.494		0.0972	1.84e-05	0.000151		2.89e-05
20	CAPN13	rs10173959	2	30806079	intron	A	0.297	2	2.86e-09	0.000275		0.000244	0.148	0.0622		0.00829	8.25e-11	0.000543		4.89e-05
21	CAPN13	rs10176484	2	30806230	UTR-5	A	0.304	2	3.27e-09	6.78e-05		0.000115	0.211	0.137		0.0158	6.03e-10	0.000149		6.44e-05
22		rs10495824	2	34525478		C	0.247	2	3.61e-17	4.09e-11		0.00103	0.484	0.477		0.096	0.000124	3.02e-09		0.00398
23	THADA	rs17334919	2	43480246	intron	A	0.1	2	2.89e-14	3.96e-10		5.19e-07	0.219	0.0674		0.00846	1.06e-10	2.22e-08		3.03e-07
24	EPAS1	rs10191091	2	46346071	intron	G	0.498	2	1.48e-08	2.13e-11		5.63e-08	0.586	0.468		0.342	1.1e-09	5.05e-10		2.14e-07
25	ANTXR1	rs4255990	2	69046532	intron	C	0.062	2	1.04e-11	1.25e-05		0.000147	0.000106	0.00669		3.21e-06	1.02e-11	1.67e-07		7.89e-10
26	DNAH6	rs11889456	2	84619559	intron	C	0.077	1	1.11e-07	0.000413	9.2e-06	0.00619	0.00193	0.0168	0.00124	0.00217	8.17e-12	7.78e-05	1.16e-07	0.000111
27	MGAT5	rs755503	2	134386883	intron	A	0.427	2	5.89e-11	0.000213		0.000175	0.625	0.5		0.413	5.6e-05	0.000699		0.00106
28	TMEM163	rs503562	2	134502500	intron	G	0.474	2	9.26e-21	1.37e-14		7.52e-06	0.631	0.713		0.324	6.02e-11	3.42e-12		5.22e-05
29	TMEM163	rs666614	2	134532882	intron	G	0.416	1	1.5e-09	3.13e-07	1.93e-07	3.96e-09	0.302	0.157	0.12	0.202	0.00119	1.05e-06	5.43e-07	3.93e-08
30	UBXN4	rs6430585	2	135749357	intron	A	0.253	2	6.09e-11	4e-06		0.000393	0.325	0.264		0.0147	2.29e-09	9.08e-08		3.07e-06
31	CCDC141	rs12693171	2	178883720	intron	A	0.132	2	7.25e-15	7.51e-09		1.43e-08	0.834	0.798		0.429	1.65e-06	1.1e-07		4.59e-08
32		rs6781156	3	5811612		T	0.394	1	0.0124	0.417	0.113	0.0285	0.000294	0.000112	8.33e-06	0.011	2.48e-10	0.00324	3.97e-05	0.00206
33	CCK*	rs11129950	3	42273095		C	0.15	2	1.1e-10	4.39e-07		1.43e-06	0.344	0.335		0.0269	1.16e-07	9.97e-07		1.07e-07
34	WNT5A/ERC2*	rs751194	3	55453400		T	0.46	2	2.28e-06	8.19e-06		0.0312	0.347	0.425		0.247	2.92e-08	0.000145		0.028
35	FHIT	rs1716721	3	60696259	intron	A	0.126	2	4.23e-06	6.58e-05		0.0013	0.00899	0.0122		1.3e-05	1.13e-09	8.92e-06		2.45e-07
36	COL6A5	rs16827675	3	130428488	intron	C	0.027	2	2.9e-11	9.03e-07		2.46e-06	0.0239	0.016		0.000659	1.09e-10	7.13e-12		9.13e-10
37	GFM1	rs16829273	3	158664831	intron	C	0.155	2	3.42e-12	2.07e-08		5.5e-06	0.442	0.472		0.18	4.07e-08	8.45e-07		1.49e-05
38		rs7676659	4	26055991		T	0.414	2	4.17e-09	4.21e-07		0.0173	1	1		0.997	0.0286	0.000142		0.273
39		rs6827919	4	38389984		A	0.459	1	3.93e-09	0.00463	0.000101	3.83e-05	0.805	0.693	0.612	0.449	0.000329	0.00799	0.00129	0.000334
40	DCK-SLC4A4*	rs10012631	4	71093574		G	0.054	2	4.11e-06	5.28e-06		0.00102	0.168	0.0998		0.0229	6.1e-13	5.17e-07		3.03e-05
41	SLC4A4	rs6846301	4	71481774	intron	G	0.092	2	1.16e-08	3.37e-09		5.58e-06	0.0709	0.0478		0.00851	3.44e-12	4.3e-09		4.97e-07
42	CCSER1	rs13103126	4	90340833	intron	T	0.448	2	2.78e-08	4.49e-06		0.000883	0.638	0.562		0.268	1.14e-07	0.000328		0.00246
43	CCSER1*	rs2176312	4	91608453		C	0.478	2	6.28e-11	7.48e-07		0.000157	0.535	0.547		0.119	0.00111	3.98e-07		0.000106
44		rs1460770	4	114484189		A	0.365	2	4.34e-17	1.13e-13		1.09e-08	0.384	0.33		0.281	9.05e-11	1.35e-13		8.89e-09
45	USP38-GAB1*	rs300934	4	143250595		T	0.334	1	5.4e-07	0.0107	6.62e-06	3.68e-06	0.0168	0.0119	0.00812	0.215	1.2e-09	0.00282	5.64e-07	1.54e-05
46	FSTL5*	rs7438099	4	161343620		T	0.323	2	2.24e-08	9.55e-08		6.4e-06	0.965	0.876		0.89	0.000191	6.89e-07		4.02e-05
47	CMYA5	rs259130	5	79763725	intron	T	0.326	2	0.000659	0.0134		0.00162	0.0641	0.188		0.0413	4.11e-08	0.00563		0.000565
48		rs980831	5	101415163		T	0.022	1	0.0404	0.18	0.266	0.118	8.65e-05	0.000134	5.83e-05	1.58e-06	4.41e-10	3.26e-05	0.000618	1.18e-05
49	EFNA5	rs152608	5	107435508	intron	A	0.247	2	5.23e-11	1.12e-11		0.000316	0.941	0.868		0.786	0.00797	3.23e-10		0.0046
50	ADRB2*	rs6580586	5	148863160		C	0.116	1	9.22e-20	1.93e-09	3.08e-13	9.88e-10	0.0191	0.0184	0.0773	0.171	8.38e-25	6.29e-09	2.11e-12	9.04e-09
51	GLRA1*	rs10053232	5	152123786	intron	T	0.224	2	1.19e-09	3.68e-05		0.00251	0.76	0.811		0.34	1.03e-05	0.000202		0.00356
52	EBF1*	rs2434612	5	158595033		C	0.207	2	3.28e-17	8.25e-11		0.000421	0.231	0.0698		0.0314	6.85e-10	8.1e-10		5.41e-05
53	HLA-E-GNL1/PRR3	rs2844720	6	30507940		T	0.312	2	3.55e-08	9.56e-05		0.000122	0.575	0.498		0.124	2.5e-05	0.000283		5.96e-05
54	C6orf10	rs6907322	6	32357168	intron	A	0.184	1	2.05e-08	0.000663	6.6e-06	0.000335	0.803	0.868	0.701	0.304	0.00649	0.00218	0.000207	0.00107
55	HLA-DOA-HLA-DPA1/HLA-DPB1	rs6936620	6	33016674		T	0.363	2	8.4e-06	0.000557		6.42e-05	0.544	0.469		0.227	3.18e-09	0.0143		5.33e-05
56	COL19A1	rs17690160	6	70197672	intron	A	0.055	1	1.23e-08	0.0558	0.0113	0.0176	0.713	0.575	0.611	0.144	0.0324	0.068	0.0447	0.0123
57	VGLL2*	rs783199	6	117229431		T	0.151	2	8.58e-09	1.17e-05		0.000704	0.98	0.98		0.905	0.0154	0.00705		0.048
58		rs9482188	6	121700736		A	0.031	2	9.97e-17	2.83e-15		4.48e-06	0.296	0.195		0.0622	3.62e-10	7.6e-15		1.68e-06
59	HDAC9	rs1178348	7	18176753	intron	C	0.257	2	0.000951	0.00485		0.00152	0.251	0.425		0.152	1.13e-08	0.00112		0.00017
60	CPVL	rs7785072	7	29097886	intron	A	0.497	2	3.4e-15	1.34e-09		6.69e-05	0.449	0.409		0.15	3.22e-06	1.26e-07		0.000219
61	TMEM248*	rs4717331	7	66913899		T	0.304	2	5.89e-07	0.00025		3.52e-05	0.0816	0.000302		0.000832	2.85e-14	7.21e-10		2.68e-08
62	CALCR	rs6966283	7	93539572	intron	T	0.108	2	5.05e-19	2.92e-10		1.02e-06	0.799	0.745		0.31	1.11e-09	2.67e-08		7.59e-06
63	VGF	rs10953325	7	101162227	nearGene-3	C	0.401	2	8.37e-07	1.26e-05		0.00029	0.0991	0.0452		8.98e-05	5.91e-10	4.37e-07		1.69e-07
64		rs7807451	7	115825666		A	0.134	1	0.00593	0.0063	0.00172	0.00103	0.00382	0.00619	0.000168	0.000663	6.2e-09	4.29e-05	3.28e-06	6.43e-06
65		rs6466686	7	118996763		G	0.356	1	1.97e-08	0.00748	0.000126	0.00829	0.771	0.472	0.446	0.789	0.00116	0.00924	0.00086	0.0574
66	TSGA13	rs1038638	7	130676252	intron	C	0.461	1	0.0627	0.166	0.392	0.0552	0.00858	0.0362	0.00104	0.118	4.01e-08	0.094	0.00855	0.0279
67	CNTNAP2	rs700278	7	146492560	intron	T	0.458	2	4.73e-09	1.26e-05		0.00399	0.906	0.933		0.595	0.000682	0.000578		0.0318
68	BIN3-EGR3*	rs3893402	8	22679688		G	0.321	2	0.0154	0.00833		0.00116	0.055	0.0569		0.0011	8.35e-09	0.000809		2.2e-05
69	RP1	rs10103201	8	54530554	intron	A	0.377	1	1.19e-10	0.000166	7.1e-06	0.000157	0.241	0.0516	0.0774	0.326	2.53e-07	0.000163	7.21e-06	0.000637
70	XKR9	rs2732091	8	71006188	intron	T	0.493	1	3.94e-11	9.84e-05	4.1e-06	0.00838	0.526	0.31	0.609	0.265	9.97e-06	0.000411	0.0001	0.0124
71	SLC24A2	rs7851478	9	19653532	intron	G	0.294	1	0.00101	0.015	0.00789	0.0196	0.00813	0.00897	0.00167	0.234	7.37e-09	0.00301	0.000115	0.0216
72		rs3928808	9	32278893		A	0.345	2	4.29e-10	1.97e-06		0.00348	0.527	0.565		0.122	1.3e-07	1.68e-05		0.00409
73	FBP2	rs2987900	9	94593188	intron	G	0.057	2	0.00196	0.0571		0.0127	0.174	0.503		0.0937	1.45e-08	0.0707		0.00221
74	ABCA1	rs4149313	9	104824472	missense, ncRNA	C	0.141	2	1.74e-07	0.00163		0.0191	0.0736	0.045		0.0206	1.39e-09	8.54e-05		0.00023
75	ABCA1	rs10820738	9	104828835	intron	G	0.068	2	8.3e-09	2.11e-06		0.00334	0.736	0.468		0.0692	3.62e-06	7.92e-07		0.000332
76	LPAR1	rs1476946	9	111102469		C	0.332	1	2.47e-08	0.0018	3.84e-06	0.0126	0.603	0.133	0.357	0.809	1.3e-05	0.00144	3.45e-05	0.0802
77		rs1340131	10	16261811		T	0.028	2	1.93e-07	0.00128		3.35e-05	0.0464	0.0344		0.0012	2.27e-09	0.000696		5.48e-07
78		rs7127823	11	28939160	intron	T	0.382	2	2.67e-13	1.48e-10		1.66e-07	0.519	0.466		0.0615	9.89e-09	4.14e-10		7.5e-08
79	ARL14EP-MPPED2*	rs1222210	11	30340578		A	0.201	1	1.05e-09	0.0388	3.94e-06	0.0325	0.738	0.511	0.547	0.107	0.000277	0.111	7.71e-05	0.0159
80	SHANK2	rs10459038	11	71135915	intron	C	0.485	2	1.81e-10	0.000242		0.0367	0.694	0.61		0.523	0.00283	0.0011		0.0903
81	NTM	rs2442100	11	131429821	intron	C	0.047	2	6.59e-10	3.87e-08		2.29e-05	0.657	0.573		0.234	2.02e-08	6.09e-07		5.17e-05
82	SLCO1B7	rs11045743	12	21089365	intron	G	0.045	2	5.78e-14	2.56e-10		5.23e-07	0.0897	0.0568		0.00132	1.41e-06	7.93e-11		2.36e-07
83	FGD4	rs7315682	12	32533023	nearGene-5	A	0.144	2	8.62e-09	1.4e-05		0.00386	0.329	0.565		0.0908	0.000291	5.1e-07		0.00027
84	RBM19*	rs11066861	12	113982465		A	0.057	2	3.84e-12	1.2e-08		6.65e-07	0.301	0.301		0.0748	4.81e-12	1.15e-07		2.71e-07
85	CDK2AP1	rs1109559	12	123273314	nearGene-5	C	0.324	1	1.48e-06	4.87e-06	1.71e-06	0.000376	0.35	0.302	0.364	0.65	3.1e-09	8.64e-05	1.83e-05	0.00401
86		rs9506931	13	22814989		G	0.267	1	1.05e-08	0.00423	3.45e-05	0.02	0.698	0.302	0.297	0.495	9.14e-05	0.00229	0.00016	0.0508
87	PDX1-CDX2*	rs2504220	13	27945217		T	0.114	2	4.96e-09	3.83e-05		0.000259	0.14	0.545		0.12	6.31e-08	0.000178		8.21e-05
88	DGKH	rs9315885	13	42068674	intron	G	0.365	2	5.22e-11	2.56e-09		1.44e-06	0.299	0.389		0.0789	4.4e-08	6.75e-10		2.84e-08
89	DGKH	rs670676	13	42127603	intron	T	0.208	2	2.97e-08	3.05e-05		1.72e-05	0.117	0.183		0.0287	1.34e-08	3.03e-06		3.77e-08
90		rs359412	13	64653337		C	0.495	2	3.04e-08	4.73e-06		0.0627	0.152	0.344		0.0443	0.00097	6.25e-06		0.00518
91		rs4903274	14	40055761		C	0.296	2	4.76e-16	4.43e-09		1.41e-06	0.945	0.862		0.564	1.79e-05	6.86e-07		6.19e-05
92	FUT8*	rs4899173	14	65326450		T	0.227	2	7.8e-05	0.0105		0.00108	0.0633	0.0326		0.000688	1.9e-08	0.000948		2.59e-06
93		rs7151718	14	86428552		T	0.068	2	2.95e-09	8.14e-06		0.000484	0.543	0.567		0.435	0.000106	2.93e-06		0.000604
94	RYR3	rs2217807	15	33491010	intron	G	0.427	1	3.74e-08	0.0149	0.000259	0.000259	0.898	0.935	0.847	0.881	0.000592	0.103	0.00599	0.00695
95	SHF	rs3959644	15	45195934	intron	A	0.35	2	4e-08	1.03e-05		0.00159	0.264	0.429		0.105	4.89e-08	8.88e-05		0.000811
96	ATP8B4*	rs626744	15	49760008		C	0.026	2	9.17e-08	1.17e-07		0.00233	0.00281	0.00287		0.000377	1.17e-11	8.33e-10		8.83e-08
97	SALL1*	rs7499584	16	51205506		A	0.297	1	0.0177	0.0475	0.0735	0.176	5.86e-05	9.25e-05	0.000245	2.7e-05	3.27e-12	0.000402	0.000299	0.000185
98	MT3-MT2A*	rs12444489	16	56597022		A	0.223	2	1.03e-09	9.58e-08		2.12e-07	0.194	0.199		0.0551	3e-06	1.93e-06		2.56e-07
99		rs2057827	16	66235992		C	0.165	2	6.99e-14	1.17e-08		6.03e-08	0.368	0.202		0.161	8.2e-10	1.09e-09		1.88e-07
100	CYB5B	rs246134	16	69440614	intron	T	0.416	2	5.22e-10	1.52e-08		2.36e-08	0.289	0.173		0.248	7.04e-10	3.84e-09		1.17e-09
101	GLP2R-RCVRN*	rs874307	17	9894757		G	0.271	1	2.65e-09	0.00102	5.9e-08	4.13e-05	0.769	0.357	0.37	0.332	7.41e-07	0.00282	1.11e-06	0.000219
102	MAPT	rs11079727	17	45899447	intron	T	0.167	2	4.33e-09	5.97e-07		4.97e-05	0.0257	0.103		0.00166	1.11e-06	3.1e-06		5.66e-06
103		rs7213039	17	51433911	nearGene-5	T	0.221	2	2.9e-08	0.000234		8.62e-06	0.44	0.27		0.134	2.5e-06	0.000585		2.56e-05
104		rs312750	17	70347398		C	0.498	2	4.46e-08	8.6e-06		0.0022	0.204	0.00258		0.00115	1.48e-07	3.53e-10		3.93e-06
105	RNF157	rs11539879	17	76166467	missense,nc transcript variant	A	0.043	2	1.46e-05	1.21e-06		0.00872	0.00864	0.00561		0.00075	1.84e-06	9.3e-09		8.41e-05
106	PTPRM	rs1031116	18	7861458	intron	T	0.047	2	1.98e-08	5.14e-06		0.0165	0.579	0.566		0.271	5.86e-06	1.12e-05		0.00773
107	MPPE1/GNAL-IMPA2*	rs4797589	18	11917411	intron	A	0.45	2	6.74e-09	1.04e-06		0.0139	0.405	0.223		0.0955	0.00331	1e-07		0.00134
108	LDLRAD4	rs7231732	18	13554311	intron	C	0.224	2	1.61e-12	2.33e-11		3.26e-05	0.0722	0.112		0.013	3.62e-14	1.36e-11		3.87e-06
109		rs10048286	18	44454280	intron	A	0.192	2	1.95e-10	2.24e-09		0.00168	0.844	0.826		0.492	7.54e-05	2.04e-08		0.00533
110		rs4433895	18	76663057	nearGene-5	C	0.435	2	1.79e-08	1.21e-06		3.05e-05	0.645	0.536		0.165	1.59e-05	3.17e-05		2.51e-05
111	UQCRFS1*	rs10408404	19	29248822		A	0.342	2	3.05e-08	1.32e-06		0.0266	0.549	0.531		0.4	9e-06	2.67e-05		0.0981
112	ZNF283	rs11673332	19	43835290	intron	G	0.12	2	5.51e-09	2.12e-05		0.00014	0.82	0.907		0.859	0.000182	0.00368		0.00732
113	MICAL3	rs9605473	22	17980500	intron, nearGene-3	C	0.243	2	0.0328	0.145		0.139	0.163	0.151		0.0218	2.58e-08	0.0168		0.00976
114		rs8136986	22	47891569		A	0.198	2	5.31e-10	3.22e-09		0.000769	0.733	0.638		0.0888	0.00048	1.23e-07		2.38e-05
115		rs11090806	22	48002740		T	0.057	1	2.25e-09	0.000161	2.14e-07	0.00137	0.386	0.419	0.182	0.361	1.15e-05	0.00107	1.07e-06	0.00421
Chr = chromosome; Location = location in base pairs; EA = effect allele; EAF = EA frequency.
12M domain: BG, BMI, CRP, creatinine, DBP, FVC, HC, HDL-C, HR, SBP, TC, TG
8DD domain: AD, AF, cancer, CHD, DM, death, HF, stroke
20P domain: BG, BMI, CRP, Creatinine, DBP, FVC, HC, HDL-C, HR, SBP, TC, TG, CHD, HF, stroke, DM, cancer, death, AF, ND
Quantitative markers: blood glucose (BG); body mass index (BMI); C-reactive protein (CRP); creatinine; diastolic blood pressure (DBP); forced vital capacity (FVC); heart rate (HR); hematocrit (HC); high-density lipoprotein cholesterol (HDL-C); systolic blood pressure (SBP); total cholesterol (TC); and triglycerides (TG).
Risk outcomes: Alzheimer’s disease and related dementias (AD), atrial fibrillation (AF); cancer; coronary heart disease (CHD); diabetes mellitus (DM); death; heart failure (HF); and stroke.
1 If an index SNP was not within protein coding gene, the closest gene was assigned. Multiple genes were assigned if they were at about the same distance up- and downstream from the index SNP or if the index SNP was within the region of overlapping genes.
2 Proxy SNPs with linkage disequilibrium (LD) r2>70% were excluded. LD with r2>1% for SNPs within ±1Mb flanking region retained in the table is given in Supplementary Table 2.
* Protein coding genes within ±100 Kb flanking region for the index SNP.
PMOp, PMOb, PMFp, PFcFp, POpFc, PObFc, and PFpFc: p-values for meta-tests (subscripts) defined in Fig. 1.
