# Supplementary material for: Strong impact of natural-selection–free heterogeneity in genetics of age-related phenotypes
Source: Aging (Albany NY). 2018 Mar 29;10(3):492–514. doi: 10.18632/aging.101407 (PMC5892700; doi:10.18632/aging.101407)
Supplement: Supplementary Table 7 [file aging-10-101407-s006.xlsx]

## Sheet: Supplementary Table 7
Supplementary Table 7. The results of pleiotropic meta-analyses for SNPs reported in Table 2 for pathway 2 in each cohort separately (pathway 2a) and after Fisher meta-analysis across cohorts (pathway 2b).
								Meta p-values				ARIC	CHS	FHS	MESA	HRS	Final
ID	Gene(s)1	SNP2	Chr	Location	SNP function	EA	EAF	POpFc	PObFc	PFpFc	Domain	p-value	p-value	p-value	p-value	p-value	p-value	Replication
1	CLCN6	rs17376328	1	11816605	intron	A	0.051	6.89e-15	1.21e-05	2.83e-07	12M		0.194	6.74e-16		0.0647	6.89e-15	No
2	NKAIN1-SNRNP40/ZCCHC17*	rs7549339	1	31249319		A	0.218	4.89e-10	3.69e-15	2.74e-06	12M	8.02e-16		0.357	0.00254	0.362	3.69e-15	Yes
3	TINAGL1-SERINC2*	rs16834550	1	31530916		A	0.125	4.17e-10	5.48e-09	1.04e-08	12M	1.19e-05	0.0567	0.00424	2.89e-05		4.17e-10
6	AKIRIN1/NDUFS5-MACF1*	rs7554809	1	39038206	intron	A	0.168	2.55e-08	4.16e-05	0.0013	12M	0.405	0.136	7.05e-06	2.09e-05		2.55e-08
7		rs778405	1	56237741		A	0.493	1.38e-11	2.34e-05	4.2e-06	12M	0.000299	0.96	3.05e-10	0.446	0.00436	1.38e-11	Yes
10	RNPC3/AMY2B-AMY2A*	rs4847151	1	103581040		T	0.365	1.04e-09	0.000548	0.0145	20P	0.0032	0.976	5.55e-10	0.285	0.0453	1.04e-09	Yes
11	NTNG1	rs7542677	1	107319431	intron	T	0.1	2.99e-09	1.94e-06	0.000608	12M	4.59e-05	0.0962	1.82e-06	0.0134	0.695	2.99e-09
12	FCRL4-FCRL3*	rs1969742	1	157643547		C	0.317	1.58e-12	1.6e-08	4.71e-05	12M	0.0075	0.455	9.74e-06	5.49e-09		1.58e-12	Yes
13	OLFML2B	rs2490420	1	161994746	UTR-3	G	0.31	2.49e-08	0.0102	0.00292	20P	0.0914	0.00254	3.54e-06	0.00291	0.363	2.49e-08
14	PRRX1	rs9426908	1	170674846	intron	C	0.069	5.97e-07	7.58e-10	2.24e-05	20P	4.37e-09		0.00172	0.137	0.156	7.58e-10	Yes
15	KCNH1	rs1934628	1	210739125	intron	G	0.164	8.52e-10	1.98e-07	1.78e-05	12M	0.182	0.576	1.57e-06	4.9e-07	0.222	8.52e-10
16	ESRRG	rs1436879	1	216909043	intron	A	0.041	1.68e-07	8.21e-09	6.72e-07	20P	9.11e-05	0.000876	0.273	1.2e-05	0.915	8.21e-09
19	ADCY3-DNAJC27*	rs10182181	2	24927427		C	0.472	8.48e-10	3.73e-06	4.44e-05	12M	0.000757	0.0029	0.189	1.16e-06	0.0369	8.48e-10
20	CAPN13	rs10173959	2	30806079	intron	A	0.297	8.25e-11	0.000543	4.89e-05	20P	3.13e-05	0.184	5.81e-09	0.0391	0.973	8.25e-11	Yes
21	CAPN13	rs10176484	2	30806230	UTR-5	A	0.304	6.03e-10	0.000149	6.44e-05	20P	0.000505	0.083	2.7e-08	0.0109	0.981	6.03e-10	Yes
22		rs10495824	2	34525478		C	0.247	3.61e-17	4.09e-11	0.00103	12M	5.36e-15	0.855	1.53e-07	0.247	0.711	3.61e-17	Yes
23	THADA	rs17334919	2	43480246	intron	A	0.1	2.89e-14	3.96e-10	5.19e-07	12M	0.789	1.03e-06	9.09e-07	2.81e-06	0.0876	2.89e-14
24	EPAS1	rs10191091	2	46346071	intron	G	0.498	1.48e-08	2.13e-11	5.63e-08	12M	2.19e-12		0.303	0.0322	0.146	2.13e-11	No
25	ANTXR1	rs4255990	2	69046532	intron	C	0.062	1.02e-11	1.67e-07	7.89e-10	20P	1.11e-13		0.187	0.403	0.168	1.02e-11	No
27	MGAT5	rs755503	2	134386883	intron	A	0.427	5.89e-11	0.000213	0.000175	12M	0.242	0.0399	0.00735	2.53e-11	0.484	5.89e-11	Yes
28	TMEM163	rs503562	2	134502500	intron	G	0.474	9.26e-21	1.37e-14	7.52e-06	12M	1.82e-10	5.01e-14	0.0681	0.189	0.142	9.26e-21	Yes
30	UBXN4	rs6430585	2	135749357	intron	A	0.253	6.09e-11	4e-06	0.000393	12M	0.0851	0.00615	3.08e-08	7.17e-05	0.781	6.09e-11	Yes
31	CCDC141	rs12693171	2	178883720	intron	A	0.132	7.25e-15	7.51e-09	1.43e-08	12M	1.75e-08	0.368	1.82e-06	1.76e-05	0.193	7.25e-15	Yes
33	CCK*	rs11129950	3	42273095		C	0.15	1.1e-10	4.39e-07	1.43e-06	12M	0.00069	2.77e-05	2.43e-06	0.0739	0.51	1.1e-10
34	WNT5A/ERC2*	rs751194	3	55453400		T	0.46	2.92e-08	0.000145	0.028	20P	8.31e-05	0.00576	5.14e-06	0.458	0.925	2.92e-08
35	FHIT	rs1716721	3	60696259	intron	A	0.126	1.13e-09	8.92e-06	2.45e-07	20P	0.00514	0.0343	1.2e-05	6.13e-05	0.19	1.13e-09
36	COL6A5	rs16827675	3	130428488	intron	C	0.027	1.09e-10	7.13e-12	9.13e-10	20P	2.7e-09		0.824	7.29e-07	0.583	7.13e-12	Yes
37	GFM1	rs16829273	3	158664831	intron	C	0.155	3.42e-12	2.07e-08	5.5e-06	12M	1.52e-06		1.36e-08	0.0311	0.661	3.42e-12	Yes
38		rs7676659	4	26055991		T	0.414	4.17e-09	4.21e-07	0.0173	12M	0.00348	0.14	0.0157	9.84e-08	0.146	4.17e-09
40	DCK-SLC4A4*	rs10012631	4	71093574		G	0.054	6.1e-13	5.17e-07	3.03e-05	20P	1.54e-10	0.762	5.74e-08	0.785	0.996	6.1e-13	Yes
41	SLC4A4	rs6846301	4	71481774	intron	G	0.092	3.44e-12	4.3e-09	4.97e-07	20P	9.19e-05	2.86e-10	0.0253	0.0548	0.99	3.44e-12	Yes
42	CCSER1	rs13103126	4	90340833	intron	T	0.448	2.78e-08	4.49e-06	0.000883	12M	1.56e-06	0.508	6.03e-05	0.0223	0.926	2.78e-08
43	CCSER1*	rs2176312	4	91608453		C	0.478	6.28e-11	7.48e-07	0.000157	12M	0.999	0.03	2.16e-05	1.53e-09	0.944	6.28e-11	Yes
44		rs1460770	4	114484189		A	0.365	4.34e-17	1.13e-13	1.09e-08	12M	2.27e-11	0.218	1.23e-10	0.372	0.666	4.34e-17	Yes
46	FSTL5*	rs7438099	4	161343620		T	0.323	2.24e-08	9.55e-08	6.4e-06	12M	1.35e-07	0.379	0.000391	0.108	0.351	2.24e-08
47	CMYA5	rs259130	5	79763725	intron	T	0.326	4.11e-08	0.00563	0.000565	20P	0.0047		2.05e-05	0.00525	0.0276	4.11e-08
49	EFNA5	rs152608	5	107435508	intron	A	0.247	5.23e-11	1.12e-11	0.000316	12M	2.59e-14	0.461	0.0183	0.621	0.987	1.12e-11	No
51	GLRA1*	rs10053232	5	152123786	intron	T	0.224	1.19e-09	3.68e-05	0.00251	12M	0.171	0.585	3.01e-10	0.00361	0.24	1.19e-09	Yes
52	EBF1*	rs2434612	5	158595033		C	0.207	3.28e-17	8.25e-11	0.000421	12M	0.00415	0.0559	6.85e-17	0.0117	0.596	3.28e-17	Yes
53	HLA-E-GNL1/PRR3	rs2844720	6	30507940		T	0.312	3.55e-08	9.56e-05	0.000122	12M	0.00397	0.109	1.65e-05	0.104	0.00176	3.55e-08
55	HLA-DOA-HLA-DPA1/HLA-DPB1	rs6936620	6	33016674		T	0.363	3.18e-09	0.0143	5.33e-05	20P	0.302	0.11	0.00653	4.97e-10	0.748	3.18e-09	Yes
57	VGLL2*	rs783199	6	117229431		T	0.151	8.58e-09	1.17e-05	0.000704	12M	2.45e-05	0.000104	0.0517	0.134	0.0142	8.58e-09
58		rs9482188	6	121700736		A	0.031	9.97e-17	2.83e-15	4.48e-06	12M	0.0567		7.96e-06	2.14e-14	0.57	9.97e-17	Yes
59	HDAC9	rs1178348	7	18176753	intron	C	0.257	1.13e-08	0.00112	0.00017	20P	0.708	0.923	1.95e-07	1.49e-05	0.182	1.13e-08
60	CPVL	rs7785072	7	29097886	intron	A	0.497	3.4e-15	1.34e-09	6.69e-05	12M	0.125	0.00117	0.00317	1.74e-13	0.216	3.4e-15	Yes
61	TMEM248*	rs4717331	7	66913899		T	0.304	2.85e-14	7.21e-10	2.68e-08	20P	0.000602	0.42	1.79e-15	0.668	0.592	2.85e-14	Yes
62	CALCR	rs6966283	7	93539572	intron	T	0.108	5.05e-19	2.92e-10	1.02e-06	12M	0.00131	0.176	5.3e-18	0.00109	0.916	5.05e-19	Yes
63	VGF	rs10953325	7	101162227	nearGene-3	C	0.401	5.91e-10	4.37e-07	1.69e-07	20P	0.407	0.0181	0.000118	2.69e-08	0.504	5.91e-10	Yes
67	CNTNAP2	rs700278	7	146492560	intron	T	0.458	4.73e-09	1.26e-05	0.00399	12M	0.00153	0.087	0.000218	7.43e-06	0.587	4.73e-09
68	BIN3-EGR3*	rs3893402	8	22679688		G	0.321	8.35e-09	0.000809	2.2e-05	20P	0.000138	0.167	1.44e-07	0.0907	0.812	8.35e-09
72		rs3928808	9	32278893		A	0.345	4.29e-10	1.97e-06	0.00348	12M	0.000994	0.0603	1.07e-08	0.063	0.203	4.29e-10	Yes
73	FBP2	rs2987900	9	94593188	intron	G	0.057	1.45e-08	0.0707	0.00221	20P	0.00847	0.0139	1.28e-08	0.307	0.998	1.45e-08	Yes
74	ABCA1	rs4149313	9	104824472	missense, ncRNA	C	0.141	1.39e-09	8.54e-05	0.00023	20P	3.37e-05	0.46	2.4e-07			1.39e-09
75	ABCA1	rs10820738	9	104828835	intron	G	0.068	8.3e-09	2.11e-06	0.00334	12M	0.000152		0.00165	0.000615	0.0149	8.3e-09
77		rs1340131	10	16261811		T	0.028	2.27e-09	0.000696	5.48e-07	20P	0.00679		8.13e-08	0.281	0.0035	2.27e-09
78		rs7127823	11	28939160	intron	T	0.382	2.67e-13	1.48e-10	1.66e-07	12M	4.96e-07	0.24	1.8e-09	0.015	0.658	2.67e-13	Yes
80	SHANK2	rs10459038	11	71135915	intron	C	0.485	1.81e-10	0.000242	0.0367	12M	0.000152	0.955	5.59e-10	0.0791	0.479	1.81e-10	Yes
81	NTM	rs2442100	11	131429821	intron	C	0.047	6.59e-10	3.87e-08	2.29e-05	12M	3.23e-06		0.219	4.29e-07	0.452	6.59e-10
82	SLCO1B7	rs11045743	12	21089365	intron	G	0.045	5.78e-14	2.56e-10	5.23e-07	12M	3.38e-08		3.36e-08	0.491	0.00913	5.78e-14	Yes
83	FGD4	rs7315682	12	32533023	nearGene-5	A	0.144	8.62e-09	1.4e-05	0.00386	12M	2.08e-07	0.223	0.00277	0.0029	0.681	8.62e-09
84	RBM19*	rs11066861	12	113982465		A	0.057	3.84e-12	1.2e-08	6.65e-07	12M	0.848	0.0211	5.39e-06	2.69e-09	0.157	3.84e-12	Yes
87	PDX1-CDX2*	rs2504220	13	27945217		T	0.114	4.96e-09	3.83e-05	0.000259	12M	0.856	0.39	1.1e-08	0.000173	0.211	4.96e-09	Yes
88	DGKH	rs9315885	13	42068674	intron	G	0.365	5.22e-11	2.56e-09	1.44e-06	12M	0.000183	0.221	0.00979	2.44e-09	0.786	5.22e-11	Yes
89	DGKH	rs670676	13	42127603	intron	T	0.208	1.34e-08	3.03e-06	3.77e-08	20P	0.218	0.632	3.19e-07	0.00056	0.0172	1.34e-08
90		rs359412	13	64653337		C	0.495	3.04e-08	4.73e-06	0.0627	12M	3.96e-09	0.231	0.00587	0.274	0.742	3.04e-08	Yes
91		rs4903274	14	40055761		C	0.296	4.76e-16	4.43e-09	1.41e-06	12M	7.62e-05	0.0365	1.05e-07	3.13e-08	0.223	4.76e-16	Yes
92	FUT8*	rs4899173	14	65326450		T	0.227	1.9e-08	0.000948	2.59e-06	20P	1.5e-06	0.105	0.000194	0.0466	0.443	1.9e-08
93		rs7151718	14	86428552		T	0.068	2.95e-09	8.14e-06	0.000484	12M			0.000209	9.24e-08	0.433	2.95e-09
95	SHF	rs3959644	15	45195934	intron	A	0.35	4e-08	1.03e-05	0.00159	12M	0.306	0.149	2.63e-10	0.996	0.126	4e-08	No
96	ATP8B4*	rs626744	15	49760008		C	0.026	1.17e-11	8.33e-10	8.83e-08	20P	0.00139	0.00126	2.56e-06	9.02e-05	0.351	1.17e-11
98	MT3-MT2A*	rs12444489	16	56597022		A	0.223	1.03e-09	9.58e-08	2.12e-07	12M	3.16e-07	0.879	3.1e-06	0.106	0.243	1.03e-09
99		rs2057827	16	66235992		C	0.165	6.99e-14	1.17e-08	6.03e-08	12M	0.0219	0.000397	1.71e-11	0.104	0.0312	6.99e-14	Yes
100	CYB5B	rs246134	16	69440614	intron	T	0.416	5.22e-10	1.52e-08	2.36e-08	12M	0.132	0.928	5.51e-10	0.000166	0.912	5.22e-10	Yes
102	MAPT	rs11079727	17	45899447	intron	T	0.167	4.33e-09	5.97e-07	4.97e-05	12M	0.00264		7.99e-06	6.99e-05	0.757	4.33e-09
103		rs7213039	17	51433911	nearGene-5	T	0.221	2.9e-08	0.000234	8.62e-06	12M	0.353	0.885	2.49e-07	0.000174	0.0764	2.9e-08
104		rs312750	17	70347398		C	0.498	1.48e-07	3.53e-10	3.93e-06	20P	0.869	0.896	2.09e-10	0.000424		3.53e-10	Yes
105	RNF157	rs11539879	17	76166467	missense,nc transcript variant	A	0.043	1.84e-06	9.3e-09	8.41e-05	20P	0.00011		0.253	7.14e-07	0.132	9.3e-09
106	PTPRM	rs1031116	18	7861458	intron	T	0.047	1.98e-08	5.14e-06	0.0165	12M	2.19e-05		0.0351	1.72e-05	0.464	1.98e-08
107	MPPE1/GNAL-IMPA2*	rs4797589	18	11917411	intron	A	0.45	6.74e-09	1.04e-06	0.0139	12M	0.0451	0.152	0.00661	1.59e-08	0.265	6.74e-09	Yes
108	LDLRAD4	rs7231732	18	13554311	intron	C	0.224	3.62e-14	1.36e-11	3.87e-06	20P	4e-12		2.19e-05	0.109	0.324	3.62e-14	Yes
109		rs10048286	18	44454280	intron	A	0.192	1.95e-10	2.24e-09	0.00168	12M	5.47e-10	0.675	0.00307	0.041	0.0721	1.95e-10	Yes
110		rs4433895	18	76663057	nearGene-5	C	0.435	1.79e-08	1.21e-06	3.05e-05	12M	2.82e-05	0.217	2.33e-07	0.443	0.934	1.79e-08
111	UQCRFS1*	rs10408404	19	29248822		A	0.342	3.05e-08	1.32e-06	0.0266	12M	4.89e-08	0.24	0.000524	0.522	0.342	3.05e-08	Yes
112	ZNF283	rs11673332	19	43835290	intron	G	0.12	5.51e-09	2.12e-05	0.00014	12M	0.0644	0.436	2.85e-06	0.0369	5.12e-05	5.51e-09
113	MICAL3	rs9605473	22	17980500	intron, nearGene-3	C	0.243	2.58e-08	0.0168	0.00976	20P	0.00101	0.908	0.00128	3.71e-06	0.208	2.58e-08
114		rs8136986	22	47891569		A	0.198	5.31e-10	3.22e-09	0.000769	12M	7.97e-12	0.534	0.24	0.0107	0.954	5.31e-10	Yes
Chr = chromosome; Location = location in base pairs; EA = effect allele; EAF = EA frequency.
Domain: a domain of phenotypes in which a given SNP attained minimal genome-wide significant p-value in our pleiotropic meta-analysis. Minimal p-value was considered across domains of 12 quantitative markers (12M), domain of 7 diseases and death (8DD), and domain of all 20 phenotypes (20P). P-values are given for all pleiotropic meta-tests in a given pathway (Fig. 1).
POpFc, PObFc, and PFpFc: p-values for meta-tests in pathway 2 defined in Fig. 1.
Empty cells for p-values indicate missing SNPs in a given study.
Cohort-specific p-values are given for the pleiotropic meta-test with the smallest p-value.
Final: p-value after Fisher meta-analysis across cohorts.
Replication indicates whether (yes) or not (no) strong association with genome-wide significance in one cohort was replicated at Bonferroni adjusted significance level (p<0.05/(Ncohorts-1)) in at least one additional cohort.
Empty cells in column "Replication" indicate SNPs which did not require replication analysis because they did not attain genome-wide significance in an individual study.
12M domain: BG, BMI, CRP, creatinine, DBP, FVC, HC, HDL-C, HR, SBP, TC, TG
8DD domain: AD, AF, cancer, CHD, DM, death, HF, stroke
20P domain: BG, BMI, CRP, Creatinine, DBP, FVC, HC, HDL-C, HR, SBP, TC, TG, CHD, HF, stroke, DM, cancer, death, AF, ND
Quantitative markers: blood glucose (BG); body mass index (BMI); C-reactive protein (CRP); creatinine; diastolic blood pressure (DBP); forced vital capacity (FVC); heart rate (HR); hematocrit (HC); high-density lipoprotein cholesterol (HDL-C); systolic blood pressure (SBP); total cholesterol (TC); and triglycerides (TG).
Risk outcomes: Alzheimer’s disease and related dementias (AD), atrial fibrillation (AF); cancer; coronary heart disease (CHD); diabetes mellitus (DM); death; heart failure (HF); and stroke.
1 If an index SNP was not within protein coding gene, the closest gene was assigned. Multiple genes were assigned if they were at about the same distance up- and downstream from the index SNP or if the index SNP was within the region of overlapping genes.
2 Proxy SNPs with linkage disequilibrium (LD) r2>70% were excluded. LD with r2>1% for SNPs within ±1Mb flanking region retained in the table is given in Supplementary Table 2.
* Protein coding genes within ±100 Kb flanking region for the index SNP.
