# Supplementary material for: Strong impact of natural-selection–free heterogeneity in genetics of age-related phenotypes
Source: Aging (Albany NY). 2018 Mar 29;10(3):492–514. doi: 10.18632/aging.101407 (PMC5892700; doi:10.18632/aging.101407)
Supplement: Supplementary Table 8 [file aging-10-101407-s007.xlsx]

## Sheet: Supplementary Table 8
Supplementary Table 8. Pleiotropic meta-statistics for the antagonistic heterogeneity reported in Table 2 for pathway 2 in each cohort separately and combined using three meta-tests, FpFc, OpFc, and ObFc in pathway 2b (Figure 1).
								Meta p-values					ARIC				CHS				FHS				MESA				HRS
ID	Gene(s)1	SNP2	Chr	Location	SNP function	EA	EAF	POpFc	PObFc	PFpFc	Domain	Group	POp	POb	PFp	POp, POb < PFp	POp	POb	PFp	POp, POb < PFp	POp	POb	PFp	POp, POb < PFp	POp	POb	PFp	POp, POb < PFp	POp	POb	PFp	POp, POb < PFp	Ncohorts
1	CLCN6	rs17376328	1	11816605	intron	A	0.051	6.89e-15	1.21e-05	2.83e-07	12M	HP					0.194	0.137	0.132	0	6.74e-16	1.43e-06	5.52e-08	1					0.0647	0.407	0.167	1	2
2	NKAIN1-SNRNP40/ZCCHC17*	rs7549339	1	31249319		A	0.218	4.89e-10	3.69e-15	2.74e-06	12M	HP/HB	5.04e-10	8.02e-16	2.47e-07	1					0.0169	0.357	0.423	1	0.0561	0.00254	0.0442	0	0.206	0.362	0.372	0	2
6	AKIRIN1/NDUFS5-MACF1*	rs7554809	1	39038206	intron	A	0.168	2.55e-08	4.16e-05	0.0013	12M	HP	0.405	0.635	0.38	0	0.136	0.243	0.0741	0	7.05e-06	0.000446	0.00386	1	2.09e-05	0.000618	0.0274	1					2
7		rs778405	1	56237741		A	0.493	1.38e-11	2.34e-05	4.2e-06	12M	HP	0.000299	0.00905	0.188	1	0.96	0.978	0.989	0	3.05e-10	9.3e-06	4.75e-08	1	0.446	0.473	0.386	0	0.00436	0.0788	0.11	1	3
10	RNPC3/AMY2B-AMY2A*	rs4847151	1	103581040		T	0.365	1.04e-09	0.000548	0.0145	20P	HP	0.0032	0.034	0.0229	1	0.976	0.98	0.991	0	5.55e-10	0.000377	0.0213	1	0.285	0.2	0.487	0	0.0453	0.0675	0.0667	0	2
11	NTNG1	rs7542677	1	107319431	intron	T	0.1	2.99e-09	1.94e-06	0.000608	12M	HP	4.59e-05	3.18e-05	0.00879	1	0.0962	0.0838	0.0935	0	1.82e-06	0.00165	0.00907	1	0.0134	0.0461	0.0508	1	0.695	0.731	0.514	0	3
12	FCRL4-FCRL3*	rs1969742	1	157643547		C	0.317	1.58e-12	1.6e-08	4.71e-05	12M	HP/HB	0.0075	0.0418	0.0285	1	0.455	0.584	0.442	0	9.74e-06	0.00032	0.00519	1	5.49e-09	6.17e-07	0.000756	1					3
13	OLFML2B	rs2490420	1	161994746	UTR-3	G	0.31	2.49e-08	0.0102	0.00292	20P	HP	0.0914	0.178	0.0917	0	0.00254	0.053	0.0796	1	3.54e-06	0.0189	0.00618	1	0.00291	0.0959	0.0624	1	0.363	0.549	0.569	0	3
14	PRRX1	rs9426908	1	170674846	intron	C	0.069	5.97e-07	7.58e-10	2.24e-05	20P	HB	4.38e-07	4.37e-09	6.53e-06	1					0.00978	0.00172	0.0814	1	0.12	0.137	0.157	0	0.575	0.156	0.243	0	2
15	KCNH1	rs1934628	1	210739125	intron	G	0.164	8.52e-10	1.98e-07	1.78e-05	12M	HP	0.182	0.137	0.14	0	0.576	0.782	0.784	0	1.57e-06	3.14e-05	4.62e-05	1	4.9e-07	1.37e-05	0.000907	1	0.222	0.212	0.475	0	2
19	ADCY3-DNAJC27*	rs10182181	2	24927427		C	0.472	8.48e-10	3.73e-06	4.44e-05	12M	HP	0.000757	0.0201	0.0172	1	0.0029	0.0116728	0.0427	1	0.189	0.44	0.498	0	1.16e-06	2.85e-05	0.000135	1	0.0369	0.11	0.139	1	4
20	CAPN13	rs10173959	2	30806079	intron	A	0.297	8.25e-11	0.000543	4.89e-05	20P	HP	3.13e-05	0.00607	0.0105	1	0.184	0.238749	0.217	0	5.81e-09	0.000667	5.47e-05	1	0.0391	0.176	0.0629	1	0.973	0.984	0.976	0	3
21	CAPN13	rs10176484	2	30806230	UTR-5	A	0.304	6.03e-10	0.000149	6.44e-05	20P	HP	0.000505	0.121	0.0266	1	0.083	0.107	0.162	1	2.7e-08	6.26e-05	9.95e-05	1	0.0109	0.0393	0.0257	1	0.981	0.985	0.986	0	4
22		rs10495824	2	34525478		C	0.247	3.61e-17	4.09e-11	0.00103	12M	HP/HB	5.36e-15	1.22e-12	9.72e-05	1	0.855	0.821729	0.755	0	1.53e-07	0.00118	0.0194	1	0.247	0.643	0.347	0	0.711	0.759	0.793	0	2
23	THADA	rs17334919	2	43480246	intron	A	0.1	2.89e-14	3.96e-10	5.19e-07	12M	HP/HB	0.789	0.945	0.939	0	1.03e-06	6.7e-05	0.000871	1	9.09e-07	1.07e-06	2.46e-05	1	2.81e-06	0.000703	0.00866	1	0.0876	0.157	0.176	1	4
24	EPAS1	rs10191091	2	46346071	intron	G	0.498	1.48e-08	2.13e-11	5.63e-08	12M	HB	2.23e-08	2.19e-12	5.14e-09	1					0.0921	0.303	0.447	0	0.0397	0.0322	0.0673	1	0.0544	0.146	0.129	0	2
27	MGAT5	rs755503	2	134386883	intron	A	0.427	5.89e-11	0.000213	0.000175	12M	HP	0.242	0.388	0.67	0	0.0399	0.00835	0.0944	1	0.00735	0.0298	0.0141	1	2.53e-11	0.000647	6.74e-05	1	0.484	0.795	0.645	0	3
28	TMEM163	rs503562	2	134502500	intron	G	0.474	9.26e-21	1.37e-14	7.52e-06	12M	HP/HB	1.82e-10	8.58e-08	0.00023	1	5.01e-14	2.54e-10	0.000364	1	0.0681	0.0518	0.131	1	0.189	0.562	0.272	0	0.142	0.126	0.254	0	3
30	UBXN4	rs6430585	2	135749357	intron	A	0.253	6.09e-11	4e-06	0.000393	12M	HP	0.0851	0.0133	0.0637	0	0.00615	0.00342602	0.154	1	3.08e-08	0.000678	0.00103	1	7.17e-05	0.0137	0.0128	1	0.781	0.838	0.847	0	3
31	CCDC141	rs12693171	2	178883720	intron	A	0.132	7.25e-15	7.51e-09	1.43e-08	12M	HP	1.75e-08	0.000458	0.0034	1	0.368	0.461	0.538	0	1.82e-06	2e-05	8.05e-07	0	1.76e-05	0.000223	0.000999	1	0.193	0.23	0.309	0	2
33	CCK*	rs11129950	3	42273095		C	0.15	1.1e-10	4.39e-07	1.43e-06	12M	HP	0.00069	0.0299	0.191	1	2.77e-05	0.000128	0.0148	1	2.43e-06	7.83e-05	2.56e-07	0	0.0739	0.126	0.202	1	0.51	0.666	0.699	0	3
34	WNT5A/ERC2*	rs751194	3	55453400		T	0.46	2.92e-08	0.000145	0.028	20P	HP	8.31e-05	1.64e-05	0.0185	1	0.00576	0.0296	0.075	1	5.14e-06	0.109	0.0431	1	0.458	0.646	0.834	0	0.925	0.88	0.851	0	3
35	FHIT	rs1716721	3	60696259	intron	A	0.126	1.13e-09	8.92e-06	2.45e-07	20P	HP	0.00514	0.0128	0.0106	1	0.0343	0.589	0.332	1	1.2e-05	0.000109	8.54e-05	1	6.13e-05	0.0165	0.000614	1	0.19	0.0692	0.0681	0	4
36	COL6A5	rs16827675	3	130428488	intron	C	0.027	1.09e-10	7.13e-12	9.13e-10	20P	HB	2.83e-07	2.7e-09	2.28e-07	1					0.258	0.824	0.397	0	7.91e-07	7.29e-07	7.53e-06	1	0.326	0.583	0.29	0	2
37	GFM1	rs16829273	3	158664831	intron	C	0.155	3.42e-12	2.07e-08	5.5e-06	12M	HP/HB	1.52e-06	4.96e-07	6.21e-05	1					1.36e-08	0.000429	0.000983	1	0.0311	0.0499	0.0764	1	0.661	0.607	0.829	0	3
38		rs7676659	4	26055991		T	0.414	4.17e-09	4.21e-07	0.0173	12M	HP	0.00348	0.0317	0.247	1	0.14	0.261	0.199	0	0.0157	0.162	0.085	1	9.84e-08	6.43e-08	0.0154	1	0.146	0.277	0.318	0	3
40	DCK-SLC4A4*	rs10012631	4	71093574		G	0.054	6.1e-13	5.17e-07	3.03e-05	20P	HP	1.54e-10	1.6e-08	1.17e-05	1	0.762	0.669	0.834	0	5.74e-08	0.00345	0.000512	1	0.785	0.827	0.86	0	0.996	0.993	0.986	0	2
41	SLC4A4	rs6846301	4	71481774	intron	G	0.092	3.44e-12	4.3e-09	4.97e-07	20P	HP/HB	9.19e-05	3.71e-06	0.000857	1	2.86e-10	1.54e-05	0.000115	1	0.0253	0.0256	0.0154	0	0.0548	0.0815	0.0203	0	0.99	0.957	0.945	0	2
42	CCSER1	rs13103126	4	90340833	intron	T	0.448	2.78e-08	4.49e-06	0.000883	12M	HP	1.56e-06	3.81e-05	0.00797	1	0.508	0.494	0.557	0	6.03e-05	0.00253	0.00032	1	0.0223	0.00879	0.235	1	0.926	0.97	0.951	0	3
43	CCSER1*	rs2176312	4	91608453		C	0.478	6.28e-11	7.48e-07	0.000157	12M	HP	1	1	1	0	0.03	0.103	0.0455	0	2.16e-05	0.00887	0.0261	1	1.53e-09	5.35e-08	3.03e-05	1	0.944	0.962	0.933	0	2
44		rs1460770	4	114484189		A	0.365	4.34e-17	1.13e-13	1.09e-08	12M	HP/HB	2.27e-11	5.97e-11	9.79e-06	1	0.218	0.276	0.591	0	1.23e-10	1.42e-07	4.32e-07	1	0.372	0.495	0.232	0	0.666	0.702	0.573	0	2
46	FSTL5*	rs7438099	4	161343620		T	0.323	2.24e-08	9.55e-08	6.4e-06	12M	HP	1.35e-07	1.36e-05	0.00325	1	0.379	0.382	0.521	0	0.000391	5.05e-05	1.38e-05	0	0.108	0.0308	0.0476	0	0.351	0.513	0.564	0	1
47	CMYA5	rs259130	5	79763725	intron	T	0.326	4.11e-08	0.00563	0.000565	20P	HP	0.0047	0.01	0.0073	0					2.05e-05	0.292	0.21	1	0.00525	0.045	0.0329	1	0.0276	0.152	0.0205	0	2
49	EFNA5	rs152608	5	107435508	intron	A	0.247	5.23e-11	1.12e-11	0.000316	12M	HP/HB	1.87e-12	2.59e-14	0.000678	1	0.638	0.461	0.542	0	0.000953	0.0183	0.000297	0	0.701	0.621	0.793	0	0.953	0.987	0.955	0	1
51	GLRA1*	rs10053232	5	152123786	intron	T	0.224	1.19e-09	3.68e-05	0.00251	12M	HP	0.171	0.603	0.342	0	0.585	0.561	0.948	0	3.01e-10	2.69e-06	0.000225	1	0.00361	0.0248	0.142	1	0.24	0.239	0.126	0	2
52	EBF1*	rs2434612	5	158595033		C	0.207	3.28e-17	8.25e-11	0.000421	12M	HP/HB	0.00415	0.00172	0.177	1	0.0559	0.282	0.126	1	6.85e-17	2.23e-10	3.52e-05	1	0.0117	0.0163	0.224	1	0.596	0.719	0.685	0	4
53	HLA-E-GNL1/PRR3	rs2844720	6	30507940		T	0.312	3.55e-08	9.56e-05	0.000122	12M	HP	0.00397	0.0087	0.313	1	0.109	0.232	0.201	0	1.65e-05	0.0034	0.000128	1	0.104	0.281	0.328	0	0.00176	0.00926	0.00923	1	3
55	HLA-DOA-HLA-DPA1/HLA-DPB1	rs6936620	6	33016674		T	0.363	3.18e-09	0.0143	5.33e-05	20P	HP	0.302	0.447	0.56	0	0.11	0.136	0.236	0	0.00653	0.179	0.0504	1	4.97e-10	0.00173	2.53e-06	1	0.748	0.821	0.508	0	2
57	VGLL2*	rs783199	6	117229431		T	0.151	8.58e-09	1.17e-05	0.000704	12M	HP	2.45e-05	0.000225	0.154	1	0.000104	0.00841	0.00402	1	0.0517	0.113	0.0109	0	0.134	0.0748	0.636	0	0.0142	0.0821	0.0547	1	3
58		rs9482188	6	121700736		A	0.031	9.97e-17	2.83e-15	4.48e-06	12M	HP/HB	0.0567	0.167	0.0768	0					7.96e-06	0.012	0.0366	1	2.14e-14	1.43e-16	2.59e-06	1	0.57	0.69	0.42	0	2
59	HDAC9	rs1178348	7	18176753	intron	C	0.257	1.13e-08	0.00112	0.00017	20P	HP	0.708	0.664	0.952	0	0.923	0.984	0.97	0	1.95e-07	0.0867	0.00158	1	1.49e-05	3.48e-05	0.000341	1	0.182	0.222	0.0748	0	2
60	CPVL	rs7785072	7	29097886	intron	A	0.497	3.4e-15	1.34e-09	6.69e-05	12M	HP/HB	0.125	0.332	0.242	0	0.00117	0.00359	0.0123	1	0.00317	0.0378	0.0148	1	1.74e-13	1.45e-09	0.000496	1	0.216	0.458	0.523	0	3
61	TMEM248*	rs4717331	7	66913899		T	0.304	2.85e-14	7.21e-10	2.68e-08	20P	HP	0.000602	0.00882	0.0452	1	0.42	0.574	0.42	0	1.79e-15	4.42e-12	1.54e-10	1	0.668	0.88	0.763	0	0.592	0.75	0.423	0	2
62	CALCR	rs6966283	7	93539572	intron	T	0.108	5.05e-19	2.92e-10	1.02e-06	12M	HP/HB	0.00131	0.0135	0.0054	1	0.176	0.426	0.238	0	5.3e-18	1.98e-10	4.47e-07	1	0.00109	0.00483	0.129	1	0.916	0.958	0.917	0	3
63	VGF	rs10953325	7	101162227	nearGene-3	C	0.401	5.91e-10	4.37e-07	1.69e-07	20P	HP	0.407	0.0477	0.318	0	0.0181	0.582	0.0367	1	0.000118	0.0215	9.21e-05	0	2.69e-08	6.78e-08	1.2e-05	1	0.504	0.615	0.629	0	2
67	CNTNAP2	rs700278	7	146492560	intron	T	0.458	4.73e-09	1.26e-05	0.00399	12M	HP	0.00153	0.00605	0.00327	1	0.087	0.0643	0.23	1	0.000218	0.00428	0.176	1	7.43e-06	0.0013	0.0391	1	0.587	0.664	0.478	0	4
68	BIN3-EGR3*	rs3893402	8	22679688		G	0.321	8.35e-09	0.000809	2.2e-05	20P	HP	0.000138	0.0111	0.00465	1	0.167	0.0662	0.0617	0	1.44e-07	0.0028	3.95e-05	1	0.0907	0.326	0.351	1	0.812	0.424	0.717	0	3
72		rs3928808	9	32278893		A	0.345	4.29e-10	1.97e-06	0.00348	12M	HP	0.000994	0.000941	0.114	1	0.0603	0.13893	0.233	1	1.07e-08	7.75e-05	0.00225	1	0.063	0.0342	0.0728	0	0.203	0.432	0.47	0	3
73	FBP2	rs2987900	9	94593188	intron	G	0.057	1.45e-08	0.0707	0.00221	20P	HP	0.00847	0.0757	0.0286	1	0.0139	0.0657	0.0212	0	1.28e-08	0.0522	0.00362	1	0.307	0.725	0.513	0	0.998	0.992	0.97	0	2
74	ABCA1	rs4149313	9	104824472	missense, ncRNA	C	0.141	1.39e-09	8.54e-05	0.00023	20P	HP	3.37e-05	0.00373	0.00184	1	0.46	0.257	0.387	0	2.4e-07	0.000778	0.00329	1									2
75	ABCA1	rs10820738	9	104828835	intron	G	0.068	8.3e-09	2.11e-06	0.00334	12M	HP	0.000152	0.000111	0.0144	1					0.00165	0.00132	0.0313	1	0.000615	0.0894	0.261	1	0.0149	0.0963	0.0854	1	4
77		rs1340131	10	16261811		T	0.028	2.27e-09	0.000696	5.48e-07	20P	HP	0.00679	0.0111	0.0244	1					8.13e-08	0.00304	1.17e-06	1	0.281	0.501	0.51	0	0.0035	0.0792	0.0183	1	3
78		rs7127823	11	28939160	intron	T	0.382	2.67e-13	1.48e-10	1.66e-07	12M	HP/HB	4.96e-07	3.02e-06	0.0028	1	0.24	0.452	0.323	0	1.8e-09	5.07e-07	1.27e-07	1	0.015	0.0043	0.0925	1	0.658	0.823	0.748	0	3
80	SHANK2	rs10459038	11	71135915	intron	C	0.485	1.81e-10	0.000242	0.0367	12M	HP	0.000152	0.000238	0.115	1	0.955	0.983	0.953	0	5.59e-10	0.00263	0.00438	1	0.0791	0.163	0.26	1	0.479	0.583	0.519	0	3
81	NTM	rs2442100	11	131429821	intron	C	0.047	6.59e-10	3.87e-08	2.29e-05	12M	HP/HB	3.23e-06	3.28e-07	0.0148	1					0.219	0.322	0.323	0	4.29e-07	0.00022	7.44e-06	1	0.452	0.562	0.584	0	2
82	SLCO1B7	rs11045743	12	21089365	intron	G	0.045	5.78e-14	2.56e-10	5.23e-07	12M	HP/HB	3.38e-08	3.11e-05	0.000213	1					3.36e-08	2.83e-08	3.42e-05	1	0.491	0.737	0.625	0	0.00913	0.0743	0.0555	1	3
83	FGD4	rs7315682	12	32533023	nearGene-5	A	0.144	8.62e-09	1.4e-05	0.00386	12M	HP	2.08e-07	4.36e-06	3.75e-05	1	0.223	0.369	0.69	0	0.00277	0.169	0.239	1	0.0029	0.00752	0.525	1	0.681	0.796	0.727	0	3
84	RBM19*	rs11066861	12	113982465		A	0.057	3.84e-12	1.2e-08	6.65e-07	12M	HP	0.848	0.894	0.921	0	0.0211	0.0168	0.0911	1	5.39e-06	0.000479	1.66e-06	0	2.69e-09	3.06e-07	0.000798	1	0.157	0.168	0.368	0	2
87	PDX1-CDX2*	rs2504220	13	27945217		T	0.114	4.96e-09	3.83e-05	0.000259	12M	HP	0.856	0.926	0.891	0	0.39	0.31	0.0966	0	1.1e-08	1.17e-05	1.39e-05	1	0.000173	0.00566	0.139	1	0.211	0.3	0.384	0	2
88	DGKH	rs9315885	13	42068674	intron	G	0.365	5.22e-11	2.56e-09	1.44e-06	12M	HP/HB	0.000183	0.00444	0.000361	1	0.221	0.318	0.309	0	0.00979	0.294	0.00531	0	2.44e-09	1.88e-10	0.000238	1	0.786	0.805	0.728	0	2
90		rs359412	13	64653337		C	0.495	3.04e-08	4.73e-06	0.0627	12M	HP	3.96e-09	2.71e-08	0.00157	1	0.231	0.166	0.491	0	0.00587	0.19	0.357	1	0.274	0.59	0.626	0	0.742	0.859	0.888	0	2
91		rs4903274	14	40055761		C	0.296	4.76e-16	4.43e-09	1.41e-06	12M	HP/HB	7.62e-05	0.00107	0.0805	1	0.0365	0.0671	0.154	1	1.05e-07	0.000322	0.000119	1	3.13e-08	1.75e-05	0.000199	1	0.223	0.292	0.343	0	4
92	FUT8*	rs4899173	14	65326450		T	0.227	1.9e-08	0.000948	2.59e-06	20P	HP	1.5e-06	0.00946	5.05e-05	1	0.105	0.308	0.188	0	0.000194	0.00112	0.000207	0	0.0466	0.22	0.339	1	0.443	0.489	0.314	0	2
93		rs7151718	14	86428552		T	0.068	2.95e-09	8.14e-06	0.000484	12M	HP									0.000209	0.0314	0.173	1	9.24e-08	8.51e-06	6.4e-05	1	0.433	0.192	0.509	0	2
95	SHF	rs3959644	15	45195934	intron	A	0.35	4e-08	1.03e-05	0.00159	12M	HP	0.306	0.406	0.261	0	0.149	0.0688	0.27	0	2.63e-10	1.77e-07	0.000104	1	0.996	0.995	0.996	0	0.126	0.226	0.0962	0	1
96	ATP8B4*	rs626744	15	49760008		C	0.026	1.17e-11	8.33e-10	8.83e-08	20P	HP/HB	0.00139	0.000721	0.0485	1	0.00126	8.01e-07	2.64e-05	0	2.56e-06	0.169	0.0474	1	9.02e-05	0.000278	0.000106	0	0.351	0.64	0.589	0	2
98	MT3-MT2A*	rs12444489	16	56597022		A	0.223	1.03e-09	9.58e-08	2.12e-07	12M	HP	3.16e-07	2.88e-07	0.0176	1	0.879	0.829	0.717	0	3.1e-06	0.000161	2.39e-08	0	0.106	0.306	0.184	0	0.243	0.353	0.191	0	1
99		rs2057827	16	66235992		C	0.165	6.99e-14	1.17e-08	6.03e-08	12M	HP	0.0219	0.0106	0.0773	1	0.000397	0.00118	0.00159	1	1.71e-11	3.19e-06	2.69e-06	1	0.104	0.129	0.385	0	0.0312	0.0694	0.019	0	3
102	MAPT	rs11079727	17	45899447	intron	T	0.167	4.33e-09	5.97e-07	4.97e-05	12M	HP	0.00264	0.0182	0.109	1					7.99e-06	9.15e-06	0.000344	1	6.99e-05	0.00268	0.00217	1	0.757	0.661	0.652	0	3
103		rs7213039	17	51433911	nearGene-5	T	0.221	2.9e-08	0.000234	8.62e-06	12M	HP	0.353	0.483	0.555	0	0.885	0.916	0.875	0	2.49e-07	0.00126	0.000428	1	0.000174	0.000292	2.76e-05	0	0.0764	0.343	0.157	1	2
104		rs312750	17	70347398		C	0.498	1.48e-07	3.53e-10	3.93e-06	20P	HB	0.587	0.869	0.688	0	0.806	0.896	0.845	0	4.01e-08	2.09e-10	7.17e-08	1	0.00315	0.000424	0.0627	1					2
105	RNF157	rs11539879	17	76166467	missense, nc transcript variant	A	0.043	1.84e-06	9.3e-09	8.41e-05	20P	HB	2.94e-05	0.00011	0.000722	1					0.347	0.253	0.661	0	0.000383	7.14e-07	0.000579	1	0.277	0.132	0.359	0	2
106	PTPRM	rs1031116	18	7861458	intron	T	0.047	1.98e-08	5.14e-06	0.0165	12M	HP	2.19e-05	0.000591	0.0897	1					0.0351	0.131	0.214	1	1.72e-05	7.99e-05	0.00593	1	0.464	0.578	0.762	0	3
107	MPPE1/GNAL-IMPA2*	rs4797589	18	11917411	intron	A	0.45	6.74e-09	1.04e-06	0.0139	12M	HP	0.0451	0.175	0.0531	0	0.152	0.169	0.329	0	0.00661	0.131	0.355	1	1.59e-08	7e-08	0.00522	1	0.265	0.258	0.456	0	2
108	LDLRAD4	rs7231732	18	13554311	intron	C	0.224	3.62e-14	1.36e-11	3.87e-06	20P	HP/HB	4e-12	8.92e-13	9.71e-07	1					2.19e-05	0.0112	0.0193	1	0.109	0.367	0.307	0	0.324	0.525	0.448	0	2
109		rs10048286	18	44454280	intron	A	0.192	1.95e-10	2.24e-09	0.00168	12M	HP/HB	5.47e-10	4.7e-11	0.00213	1	0.675	0.774	0.482	0	0.00307	0.0964	0.136	1	0.041	0.133	0.031	0	0.0721	0.115	0.176	1	3
110		rs4433895	18	76663057	nearGene-5	C	0.435	1.79e-08	1.21e-06	3.05e-05	12M	HP	2.82e-05	0.00292	0.00366	1	0.217	0.236	0.0836	0	2.33e-07	2.3e-07	3.01e-05	1	0.443	0.595	0.519	0	0.934	0.885	0.894	0	2
111	UQCRFS1*	rs10408404	19	29248822		A	0.342	3.05e-08	1.32e-06	0.0266	12M	HP	4.89e-08	6.6e-08	0.00529	1	0.24	0.339	0.43	0	0.000524	0.00988	0.055	1	0.522	0.718	0.762	0	0.342	0.586	0.412	0	2
112	ZNF283	rs11673332	19	43835290	intron	G	0.12	5.51e-09	2.12e-05	0.00014	12M	HP	0.0644	0.0485	0.0103	0	0.436	0.534	0.731	0	2.85e-06	0.00369	0.0402	1	0.0369	0.0283	0.12	1	5.12e-05	0.001	0.000804	1	3
113	MICAL3	rs9605473	22	17980500	intron, nearGene-3	C	0.243	2.58e-08	0.0168	0.00976	20P	HP	0.00101	0.034	0.079	1	0.908	0.732	0.864	0	0.00128	0.382	0.379	1	3.71e-06	0.00533	0.00184	1	0.208	0.385	0.185	0	3
114		rs8136986	22	47891569		A	0.198	5.31e-10	3.22e-09	0.000769	12M	HP/HB	7.97e-12	1.01e-10	0.000121	1	0.534	0.594	0.44	0	0.24	0.172	0.279	0	0.0107	0.00811	0.0186	1	0.954	0.973	0.954	0	2
Chr = chromosome; Location = location in base pairs; EA = effect allele; EAF = EA frequency.
Domain: a domain of phenotypes in which a given SNP attained minimal genome-wide significant p-value in our pleiotropic meta-analysis. Minimal p-value was considered across domains of 12 quantitative markers (12M), domain of 7 diseases and death (8DD), and domain of all 20 phenotypes (20P). P-values are given for all pleiotropic meta-tests in a given pathway (Fig. 1).
POpFc, PObFc, and PFpFc: p-values for meta-tests in pathway 2 defined in Fig. 1.
POp, POb, and PFp are cohort-specific p-values for pathway 2a.
Group: the type of association defined in the “Antagonistic genetic heterogeneity in pleiotropic meta-analysis” section.
POp, POb < PFp indicates: (i) -log10(POp,Ob) + log10(PFp) > 0.2 and (ii) -log10(POp,Ob) or -log10(PFp) > 1 in a given cohort (then it returns 1, otherwise 0).
Ncohorts shows the number of cohorts with antagonistic heterogeneity, characterized in column POp, POb < PFp.
Empty cells indicate missing SNPs in a given study.
12M domain: BG, BMI, CRP, creatinine, DBP, FVC, HC, HDL-C, HR, SBP, TC, TG
8DD domain: AD, AF, cancer, CHD, DM, death, HF, stroke
20P domain: BG, BMI, CRP, Creatinine, DBP, FVC, HC, HDL-C, HR, SBP, TC, TG, CHD, HF, stroke, DM, cancer, death, AF, ND
Quantitative markers: blood glucose (BG); body mass index (BMI); C-reactive protein (CRP); creatinine; diastolic blood pressure (DBP); forced vital capacity (FVC); heart rate (HR); hematocrit (HC); high-density lipoprotein cholesterol (HDL-C); systolic blood pressure (SBP); total cholesterol (TC); and triglycerides (TG).
Risk outcomes: Alzheimer’s disease and related dementias (AD), atrial fibrillation (AF); cancer; coronary heart disease (CHD); diabetes mellitus (DM); death; heart failure (HF); and stroke.
1 If an index SNP was not within protein coding gene, the closest gene was assigned. Multiple genes were assigned if they were at about the same distance up- and downstream from the index SNP or if the index SNP was within the region of overlapping genes.
2 Proxy SNPs with linkage disequilibrium (LD) r2>70% were excluded. LD with r2>1% for SNPs within ±1Mb flanking region retained in the table is given in Supplementary Table 2.
* Protein coding genes within ±100 Kb flanking region for the index SNP.
