# Supplementary material for: Strong impact of natural-selection–free heterogeneity in genetics of age-related phenotypes
Source: Aging (Albany NY). 2018 Mar 29;10(3):492–514. doi: 10.18632/aging.101407 (PMC5892700; doi:10.18632/aging.101407)
Supplement: Supplementary Table 9 [file aging-10-101407-s008.xlsx]

## Sheet: Supplementary Table 9
Supplementary Table 9. Ten nominally significant gene ontology (GO) terms (Fisher’s exact test) for biological processes enriched in DAVID.
GO biological terms	N	Ratio	p-value	logP	Genes
GO:0007189~adenylate cyclase-activating G-protein coupled receptor signaling pathway	5	0.0347536	8.86549e-05	4.0523	ADCY3, CALCR, GNAL, ADRB2, PTGER3
GO:0007190~activation of adenylate cyclase activity	4	0.0278029	0.000873516	3.05873	ADCY3, CALCR, GNAL, ADRB2
GO:0008038~neuron recognition	2	0.0139014	0.0186878	1.72844	CNTNAP2, NTM
GO:0007193~adenylate cyclase-inhibiting G-protein coupled receptor signaling pathway	3	0.0208522	0.0206053	1.68602	ADCY3, GNAL, LPAR1
GO:0071277~cellular response to calcium ion	3	0.0208522	0.024012	1.61957	KCNH1, WNT5A, RYR3
GO:0007612~learning	3	0.0208522	0.0295199	1.52988	SLC24A2, CNTNAP2, SHANK2
GO:0051384~response to glucocorticoid	3	0.0208522	0.0375599	1.42528	CALCR, SDC1, PDX1
GO:0060711~labyrinthine layer development	2	0.0139014	0.0415632	1.38129	CDX2, GAB1
GO:0010038~response to metal ion	2	0.0139014	0.0460747	1.33654	MT2A, MT3
GO:0042060~wound healing	3	0.0208522	0.0545618	1.26311	WNT5A, SDC1, MACF1
The results are from GO category "GO Direct" providing GO mappings directly annotated by the source database (no parent terms included)
N denotes the number of genes in the corresponding set for a given GO term
Ratio denotes proportion of genes from our sets to those in the GO term
LogP denotes minus log-base-10-transformed p-value
