# Supplementary material for: Strong impact of natural-selection–free heterogeneity in genetics of age-related phenotypes
Source: Aging (Albany NY). 2018 Mar 29;10(3):492–514. doi: 10.18632/aging.101407 (PMC5892700; doi:10.18632/aging.101407)
Supplement: Supplementary Table 10 [file aging-10-101407-s009.xlsx]

## Sheet: Supplementary Table 10
Supplementary Table 10. Top 18 nominally significant (Fisher's exact test) ingenuity canonical pathways.
Ingenuity Canonical Pathways	p-value	logP	Ratio	Genes
G-Protein Coupled Receptor Signaling	3.23594e-05	4.49	0.0293	GAB1,LPAR1,PTGER3,ADCY3,CALCR,GNAL,MPPE1,ADRB2
GPCR-Mediated Integration of Enteroendocrine Signaling Exemplified by an L Cell	0.000331131	3.48	0.0548	GLP2R,ADCY3,CCK,ADRB2
cAMP-mediated signaling	0.000512861	3.29	0.0269	LPAR1,PTGER3,ADCY3,GNAL,MPPE1,ADRB2
Relaxin Signaling	0.00512861	2.29	0.026	GAB1,ADCY3,GNAL,MPPE1
CDK5 Signaling	0.01	2	0.0303	MAPT,ADCY3,GNAL
Gαs Signaling	0.0131826	1.88	0.0275	ADCY3,RYR3,ADRB2
Gαi Signaling	0.0169824	1.77	0.025	LPAR1,PTGER3,ADCY3
Role of NANOG in Mammalian Embryonic Stem Cell Pluripotency	0.0177828	1.75	0.0246	GAB1,CDX2,WNT5A
Cardiac Hypertrophy Signaling	0.0218776	1.66	0.0169	GAB1,ADCY3,GNAL,ADRB2
Myo-inositol Biosynthesis	0.0223872	1.65	0.2	IMPA2
Adipogenesis pathway	0.0223872	1.65	0.0224	HDAC9,EBF1,WNT5A
Colorectal Cancer Metastasis Signaling	0.025704	1.59	0.0161	GAB1,PTGER3,ADCY3,WNT5A
PCP pathway	0.0346737	1.46	0.0308	SDC1,WNT5A
CXCR4 Signaling	0.0380189	1.42	0.0182	GAB1,ADCY3,GNAL
eNOS Signaling	0.0398107	1.4	0.0179	GAB1,LPAR1,ADCY3
Gap Junction Signaling	0.0416869	1.38	0.0175	GAB1,LPAR1,ADCY3
Pregnenolone Biosynthesis	0.0436516	1.36	0.1	MICAL3
Non-Small Cell Lung Cancer Signaling	0.0467735	1.33	0.026	FHIT,GAB1
N denotes the number of genes in the corresponding set for a given GO term
Ratio denotes proportion of genes from our sets to those in the ingenuity canonical pathways
LogP denotes minus log-base-10-transformed p-value
